# Supplementary material for: Geometric models for robust encoding of dynamical information into embryonic patterns
Source: eLife journal article supplement (doi:10.7554/elife.55778), 2020-08-10

**A**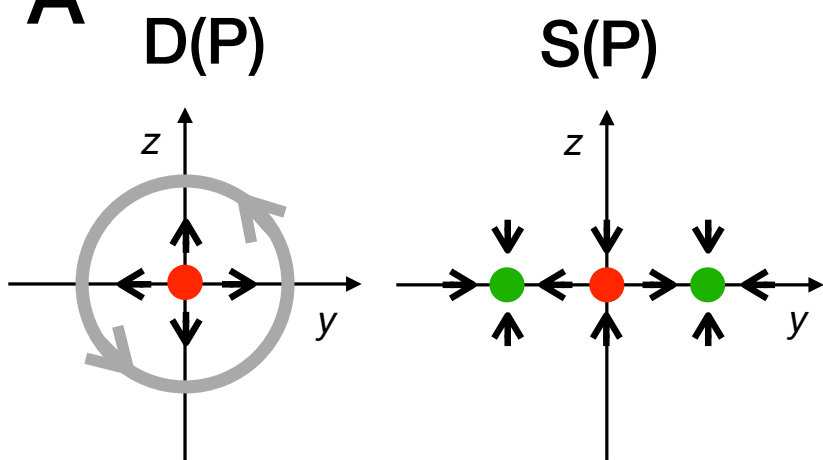**B**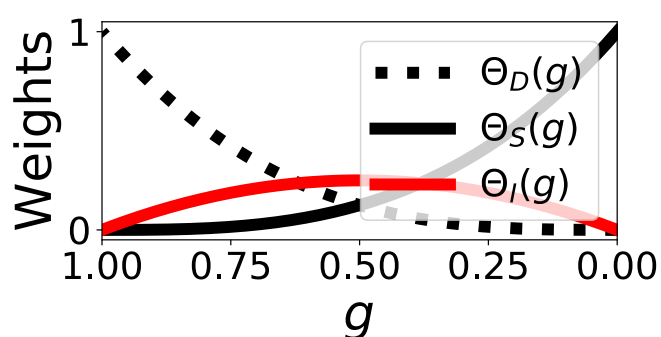**C**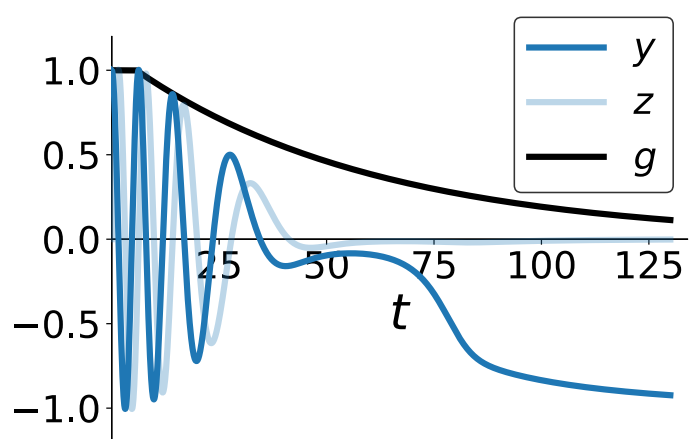**D**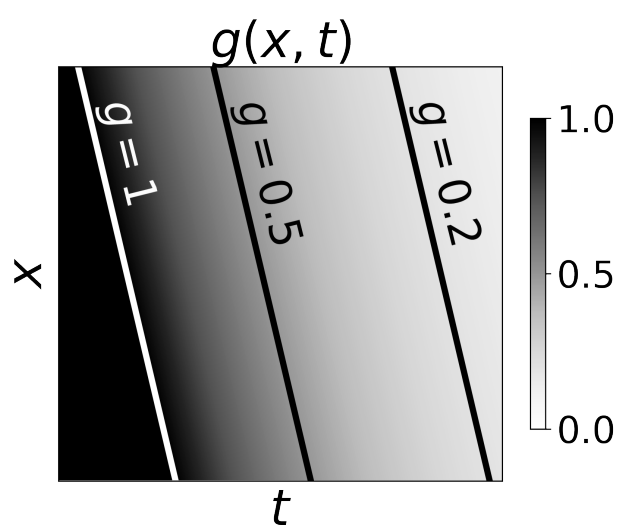**E**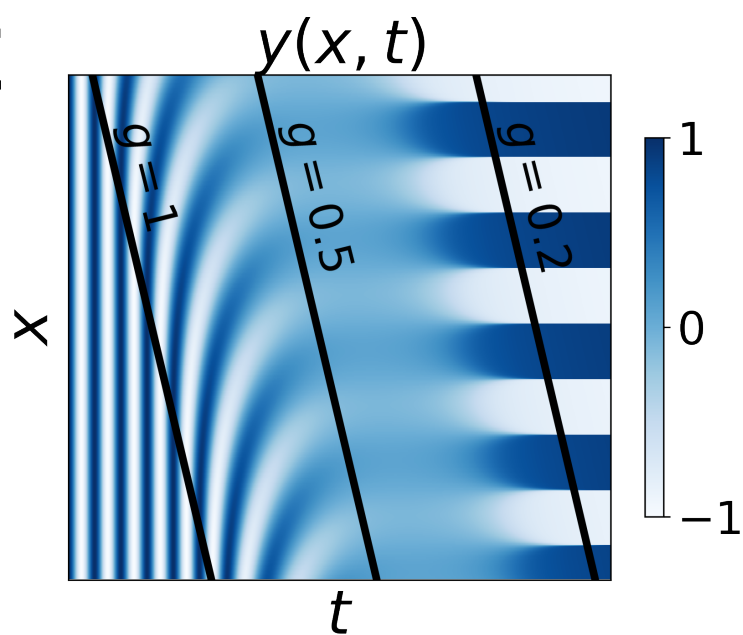**F**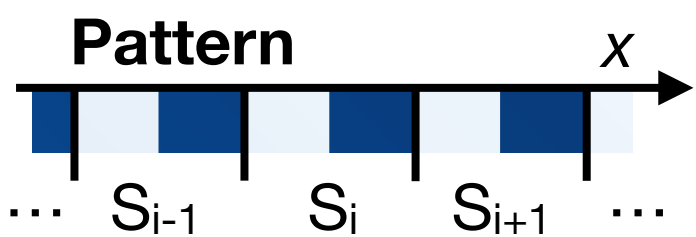**G**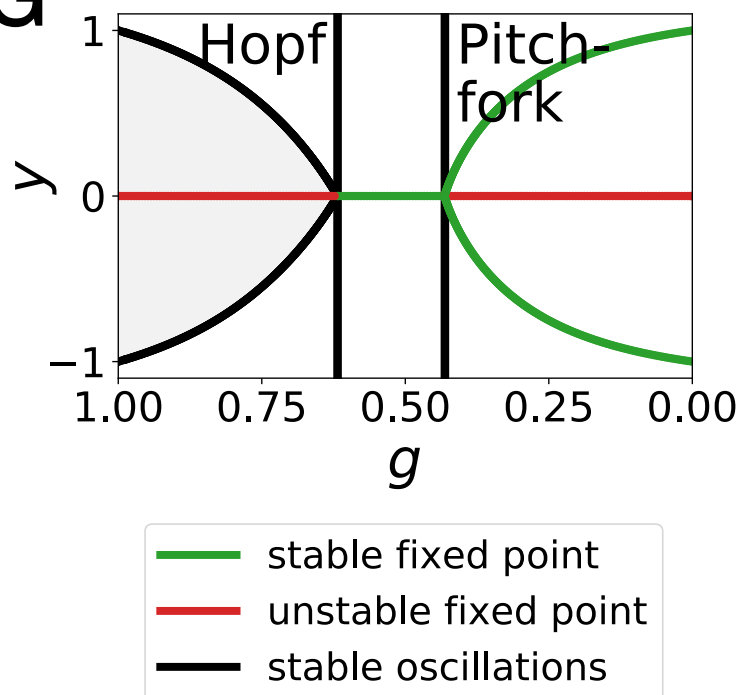**H**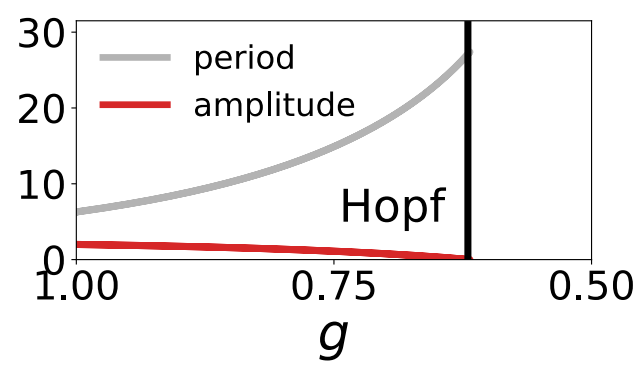Intermediate  
term **I(P)**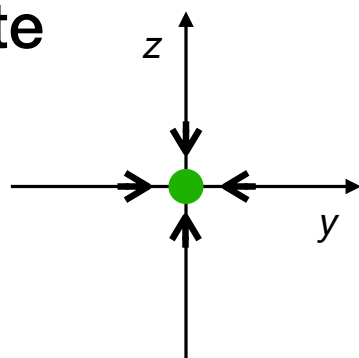**I****Flow plots****D(P)** $g = 1$ 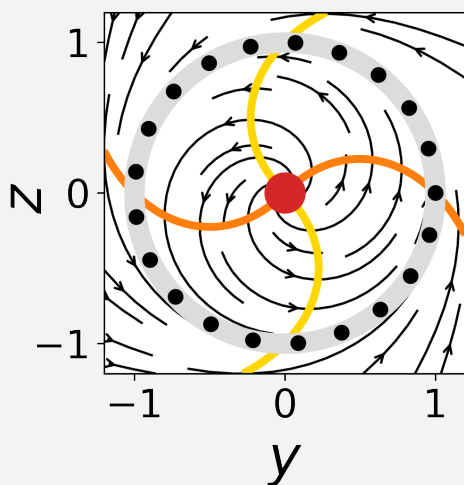 $g = 0.75$ 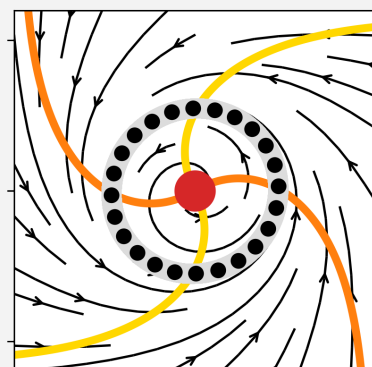Before Hopf  
 $g = 0.64$ 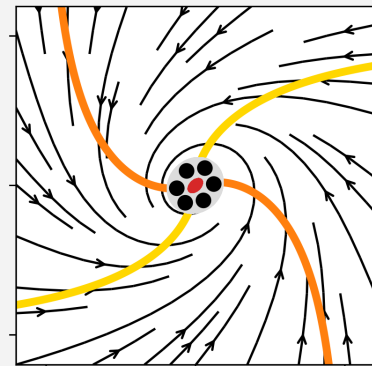After Hopf  
 $g = 0.61$ 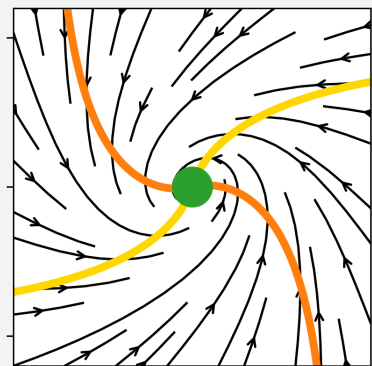Before  
pitchfork  
 $g = 0.44$ 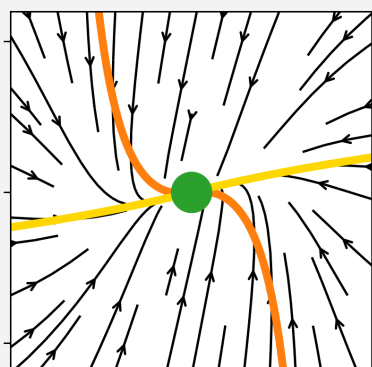After  
pitchfork  
 $g = 0.41$ 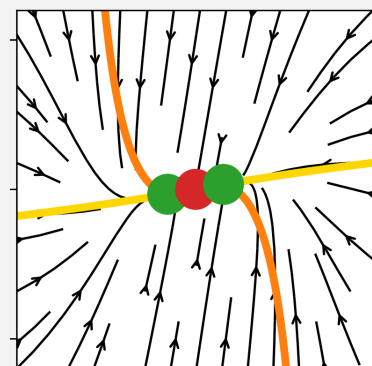 $g = 0.35$ 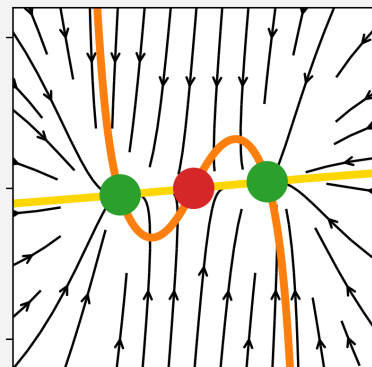**S(P)** $g = 0$ 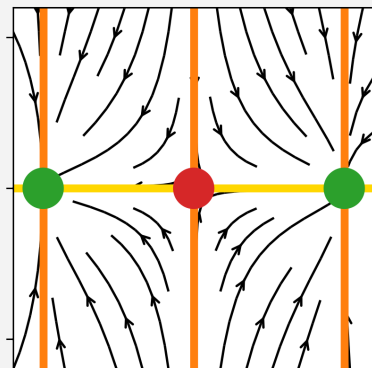

Supplement: supp [file elife-55778-supp-v1.zip › elife_poa_e55778_Figure_4_figure_supplement_2.pdf]
