# Supplementary material for: Geometric models for robust encoding of dynamical information into embryonic patterns
Source: eLife journal article supplement (doi:10.7554/elife.55778), 2020-08-10
Supplement: supp [file elife-55778-supp-v1.zip]

Archive with 21 entries (21 files):
- elife_poa_e55778_Figure_4_video_1.mp4
- elife_poa_e55778_Figure_4_video_2.mp4
- elife_poa_e55778_Figure_7_video_1.mp4
- elife_poa_e55778_Figure_4_video_3.mp4
- elife_poa_e55778_Figure_4_video_4.mp4
- elife_poa_e55778_Transparent_Reporting_File.docx
- elife_poa_e55778_Figure_1_figure_supplement_1.pdf
- elife_poa_e55778_Figure_1_figure_supplement_2.pdf
- elife_poa_e55778_Figure_2_figure_supplement_1.pdf
- elife_poa_e55778_Figure_2_figure_supplement_2.pdf
- elife_poa_e55778_Figure_3_figure_supplement_1.pdf
- elife_poa_e55778_Figure_4_figure_supplement_1.pdf
- elife_poa_e55778_Figure_4_figure_supplement_2.pdf
- elife_poa_e55778_Figure_4_figure_supplement_3.pdf
- elife_poa_e55778_Figure_4_figure_supplement_4.pdf
- elife_poa_e55778_Figure_4_figure_supplement_5.pdf
- elife_poa_e55778_Figure_5_figure_supplement_1.pdf
- elife_poa_e55778_Figure_5_figure_supplement_2.pdf
- elife_poa_e55778_Figure_6_figure_supplement_1.pdf
- elife_poa_e55778_Figure_7_figure_supplement_1.pdf
- elife_poa_e55778_Figure_7_figure_supplement_2.pdf
