# Supplementary material for: Geometric models for robust encoding of dynamical information into embryonic patterns
Source: eLife journal article supplement (doi:10.7554/elife.55778), 2020-08-10

**A**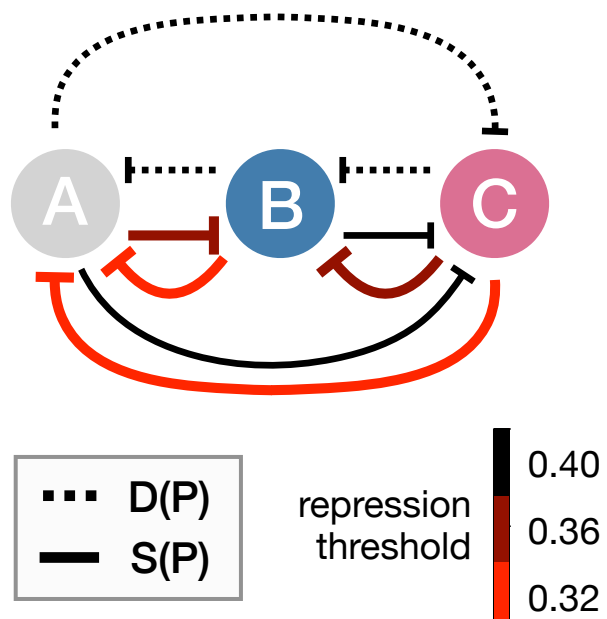**B****Model 1**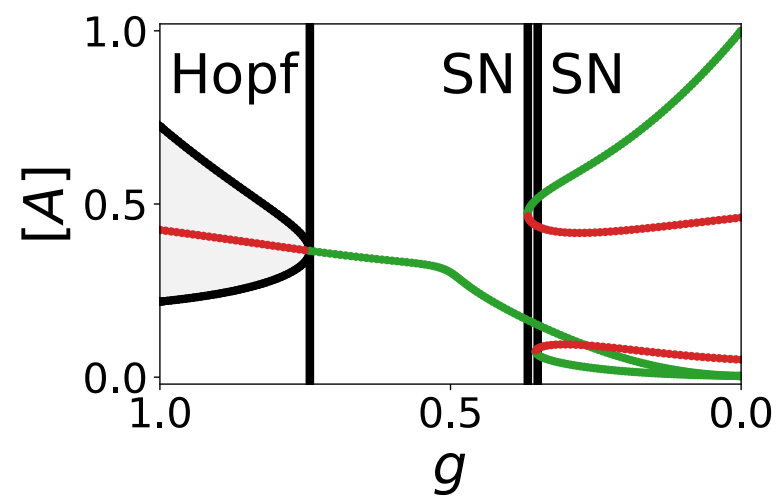

— stable fixed point   
 — unstable fixed point   
 — stable oscillations

**C****Model 2**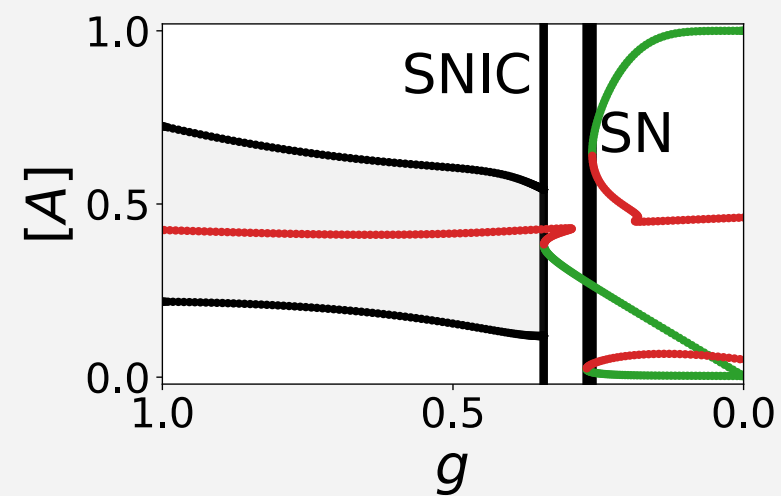**D****Steep gradient**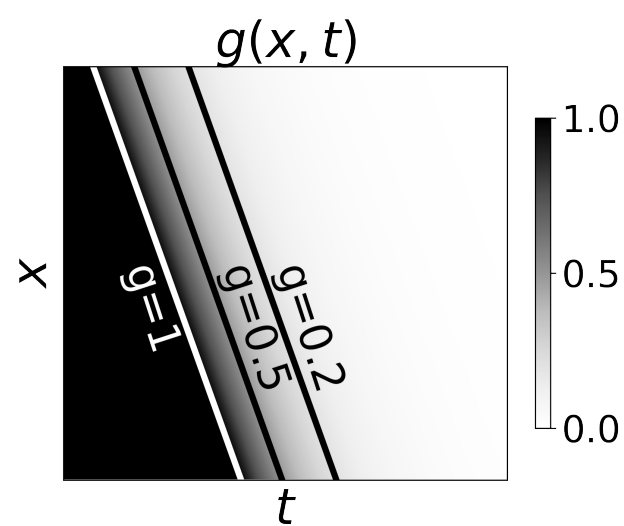**E**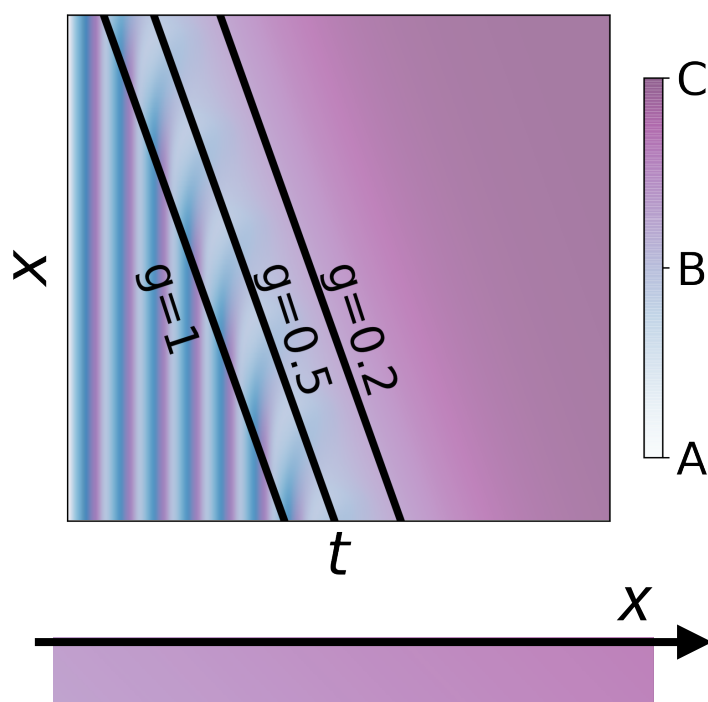**F**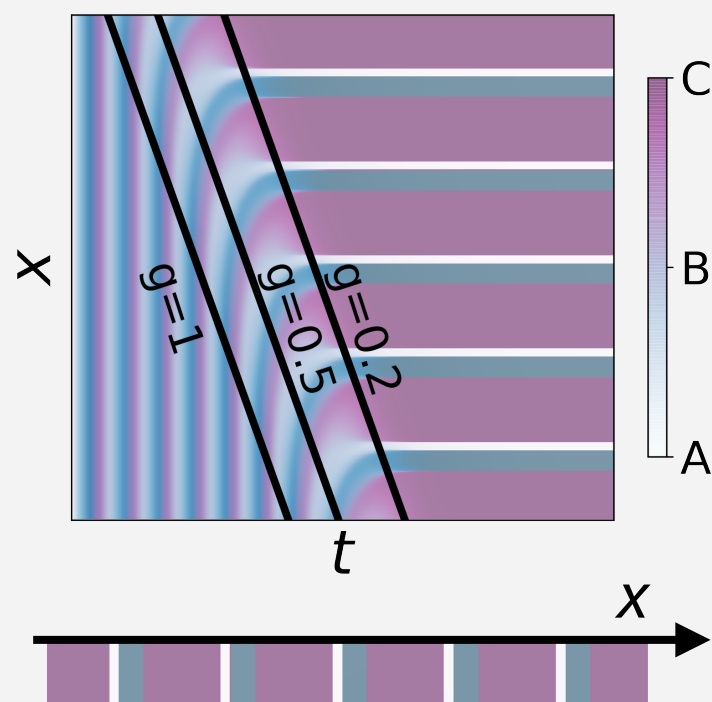**G****Shallow gradient**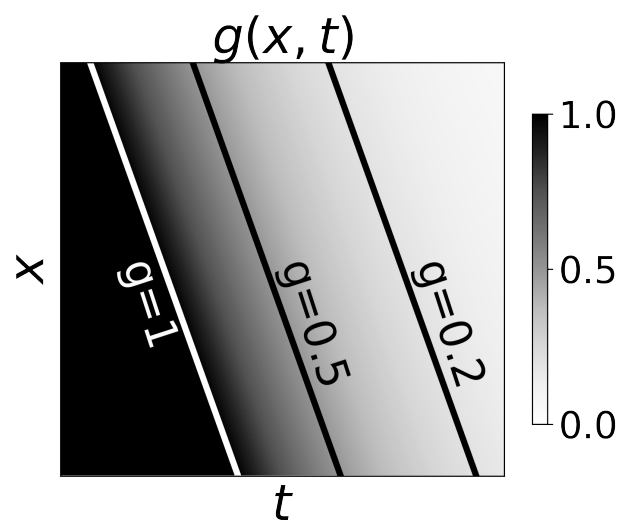**H**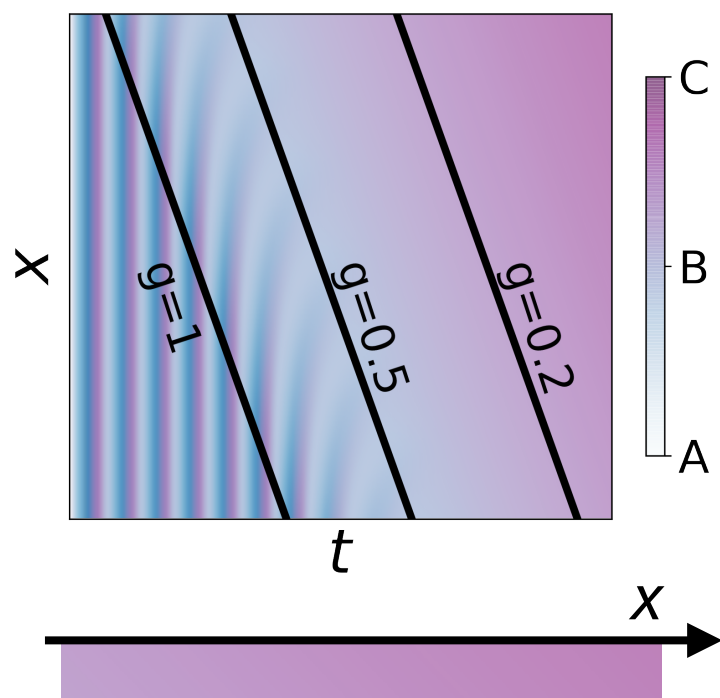**I**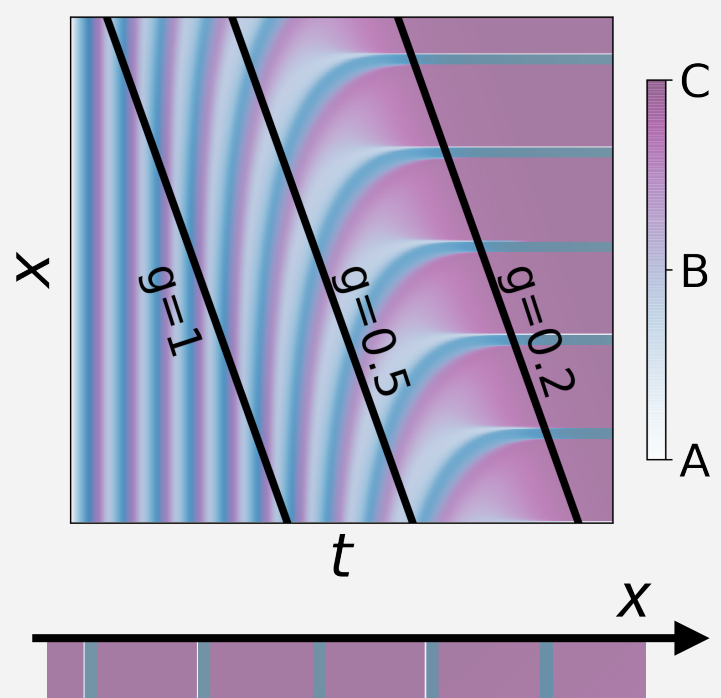

Supplement: supp [file elife-55778-supp-v1.zip › elife_poa_e55778_Figure_5_figure_supplement_1.pdf]
