# Supplementary material for: Geometric models for robust encoding of dynamical information into embryonic patterns
Source: eLife journal article supplement (doi:10.7554/elife.55778), 2020-08-10

**A**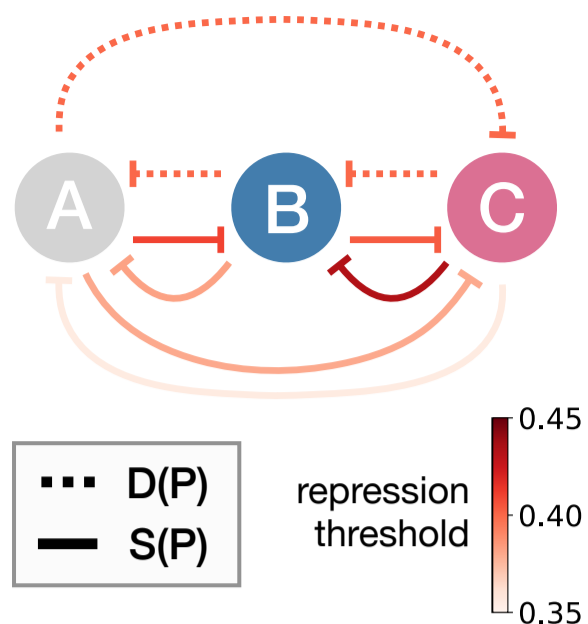**B**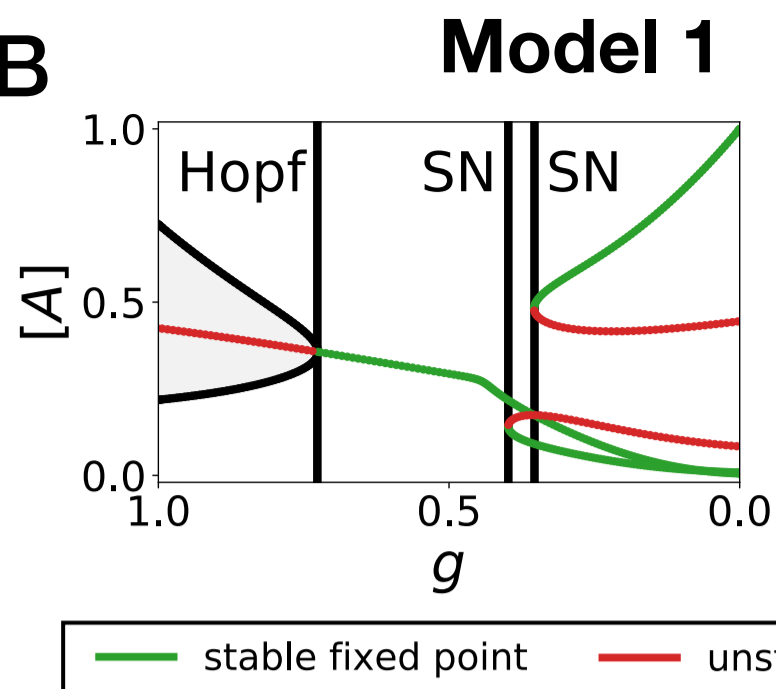**C**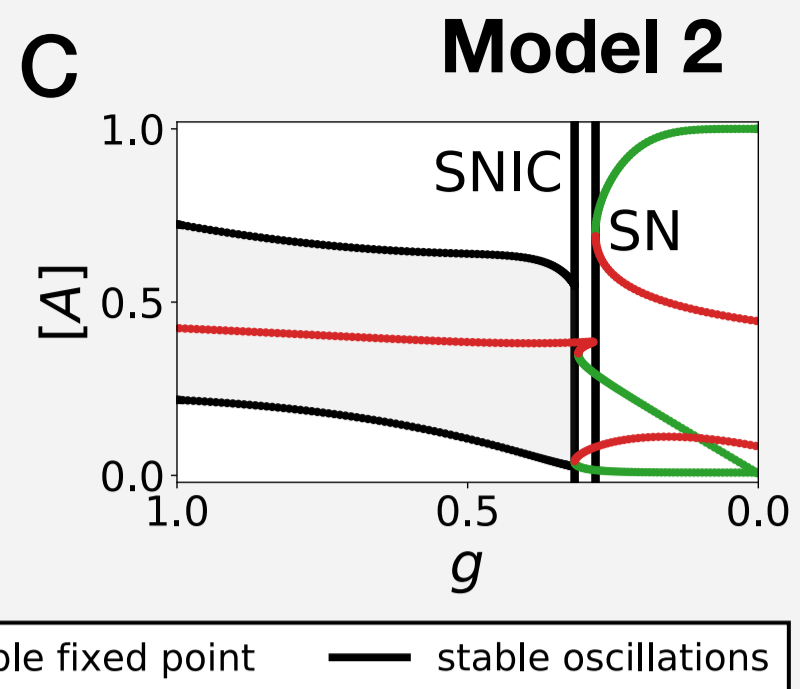**D**

## Steep gradient

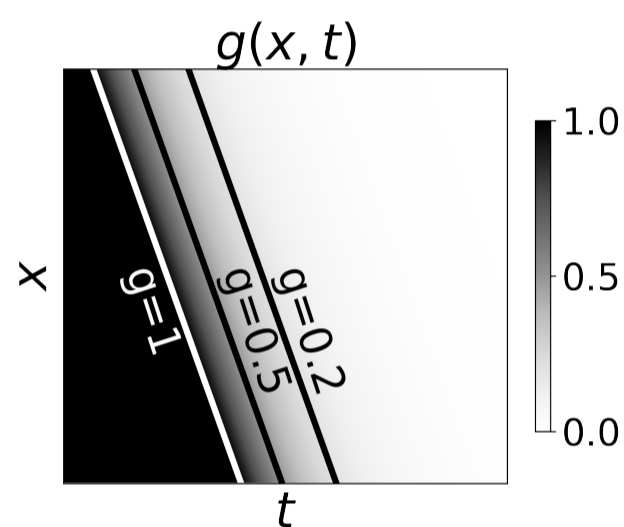**E**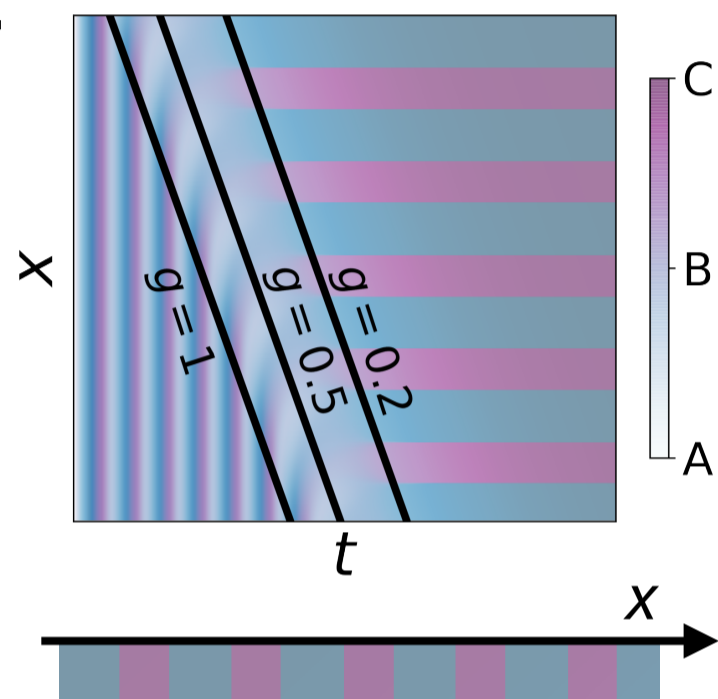**F**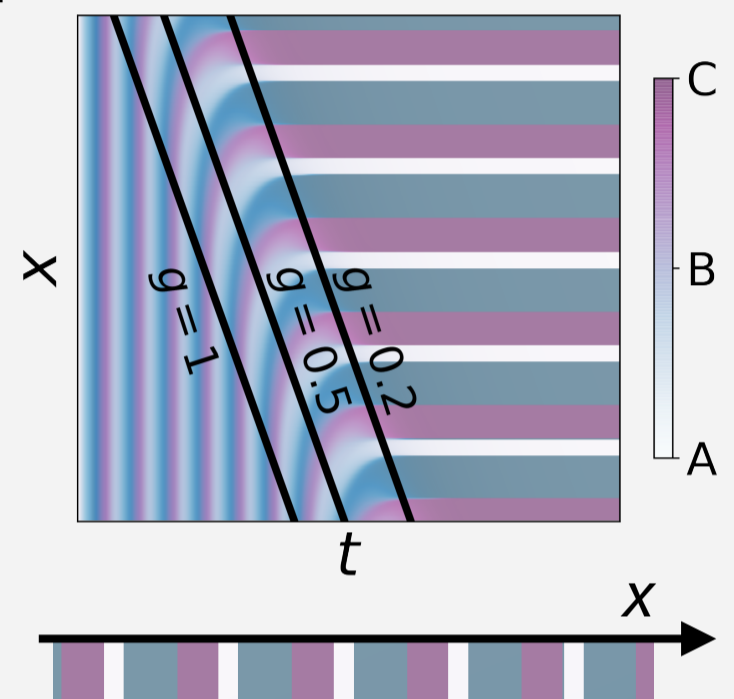**G**

## Shallow gradient

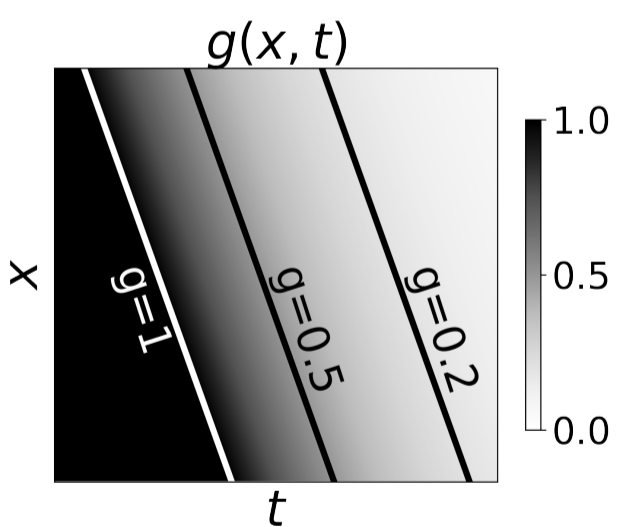**H**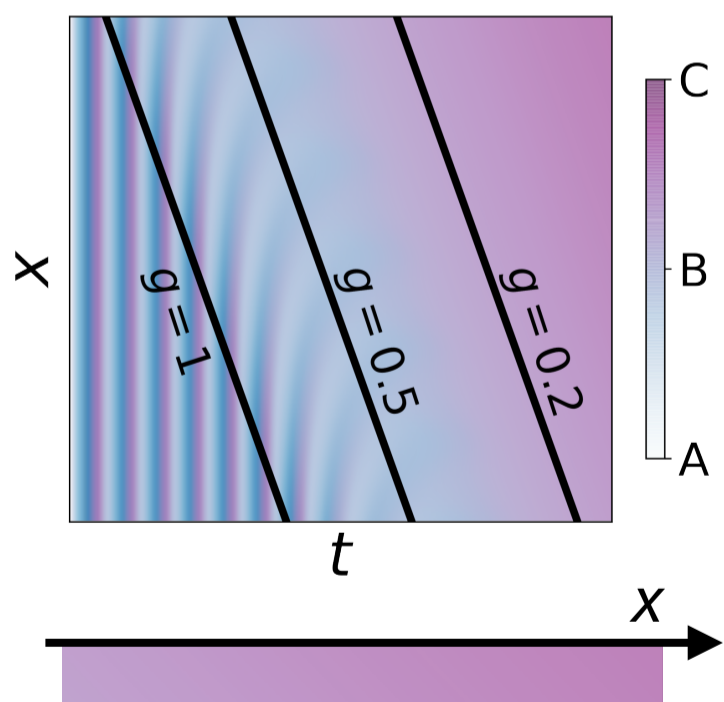**I**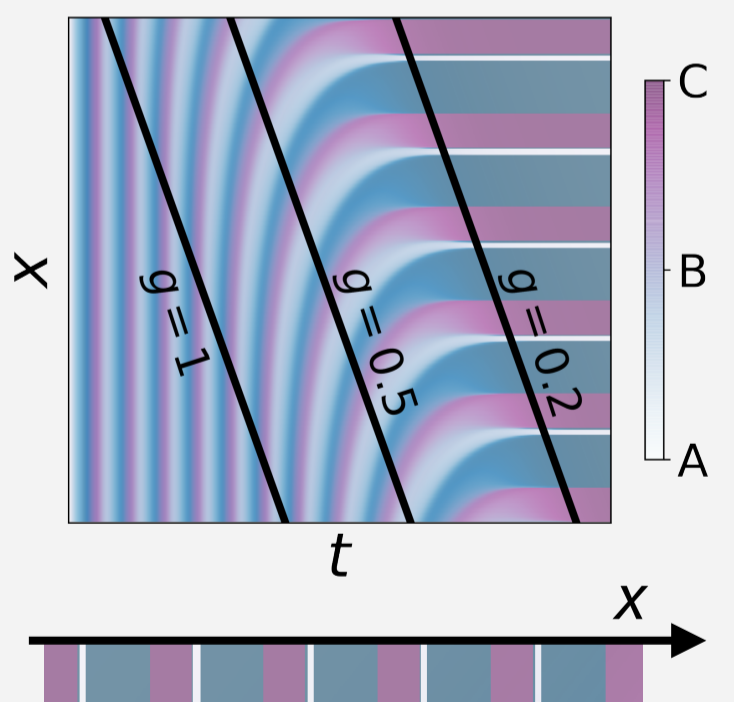**J**

## Weak asymmetry

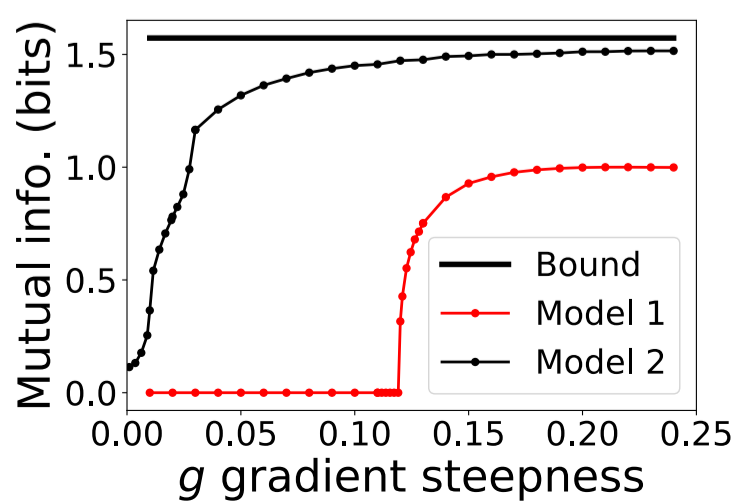

## Strong asymmetry

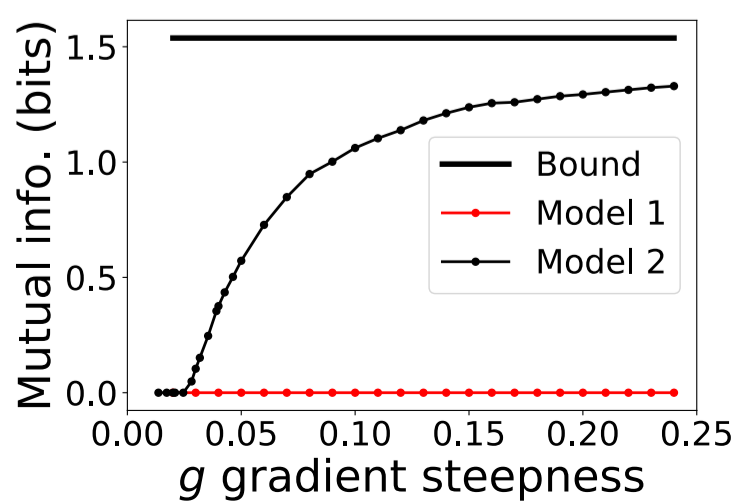

## Random asymmetry

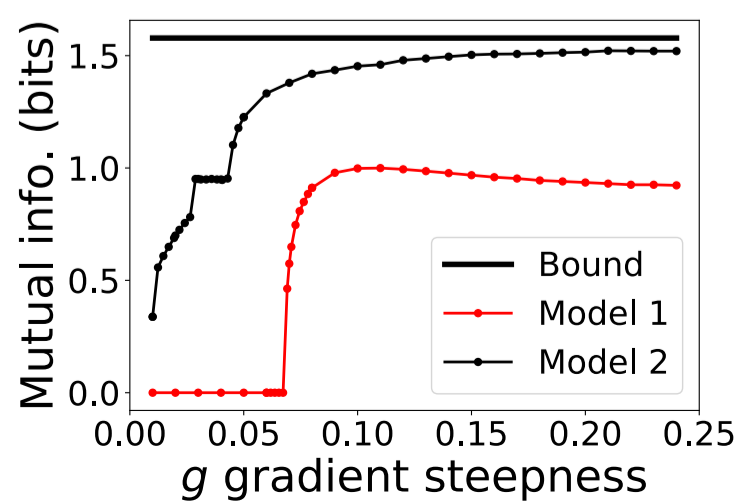

Supplement: supp [file elife-55778-supp-v1.zip › elife_poa_e55778_Figure_5_figure_supplement_2.pdf]
