# Supplementary material for: Geometric models for robust encoding of dynamical information into embryonic patterns
Source: eLife journal article supplement (doi:10.7554/elife.55778), 2020-08-10

Symmetric  
final pattern

Asymmetric  
final pattern

## A Gene-free Model 1 Hopf bifurcation

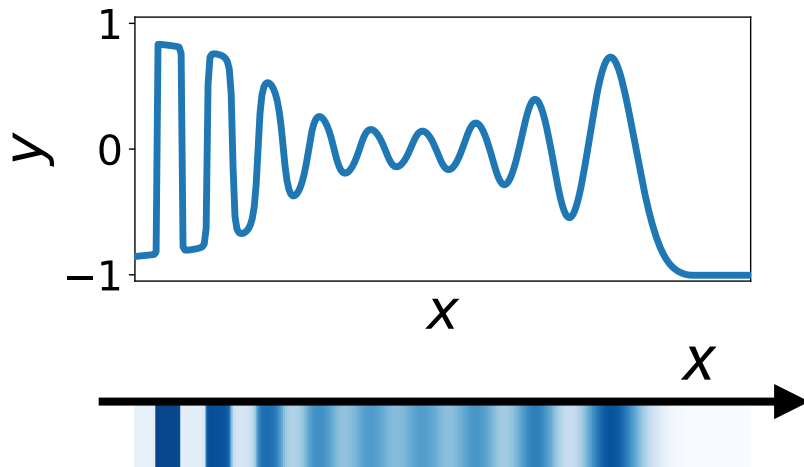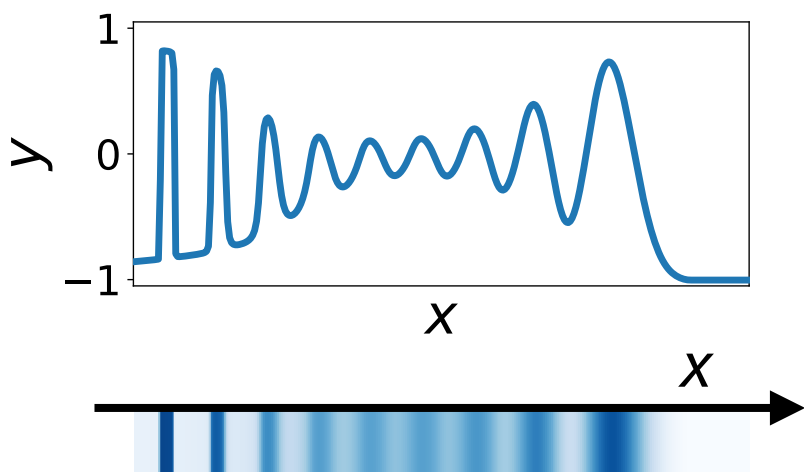

## B Gene-free Model 2 SNIC bifurcation

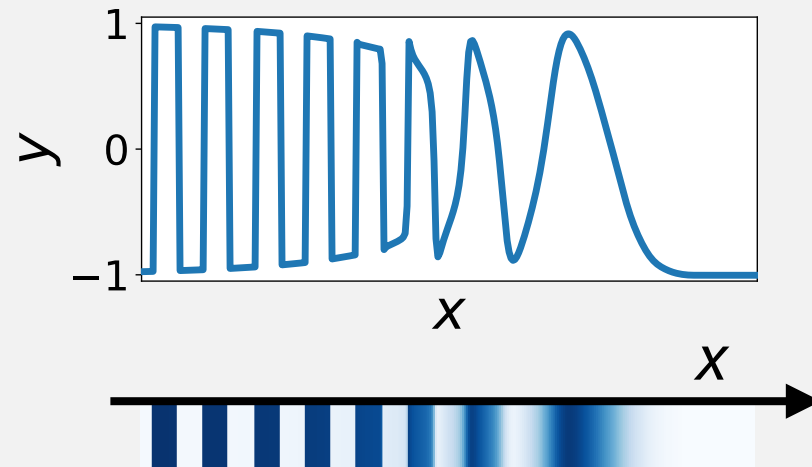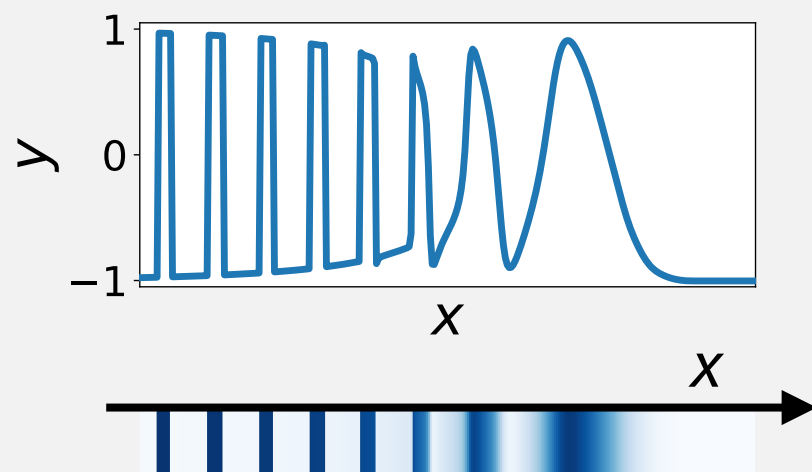

Supplement: supp [file elife-55778-supp-v1.zip › elife_poa_e55778_Figure_7_figure_supplement_1.pdf]
