# Supplementary material for: Geometric models for robust encoding of dynamical information into embryonic patterns
Source: eLife journal article supplement (doi:10.7554/elife.55778), 2020-08-10

# A Gene-free Model 1

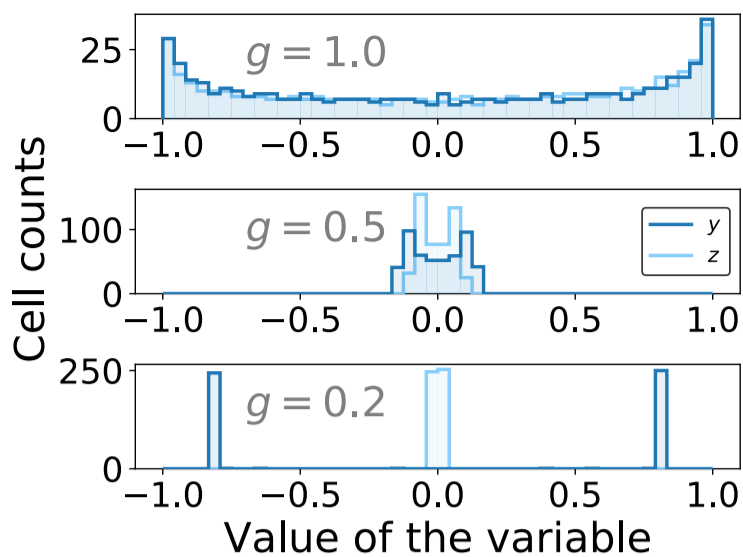

# Gene-free Model 2

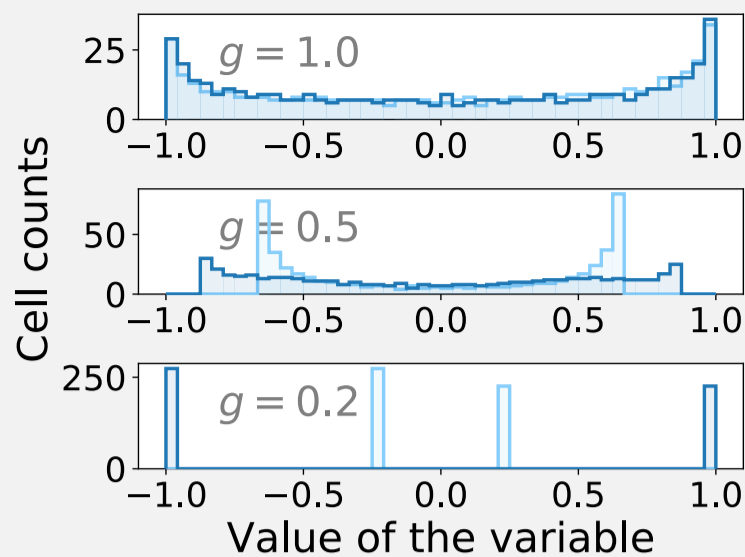

# Gene-free Model 3

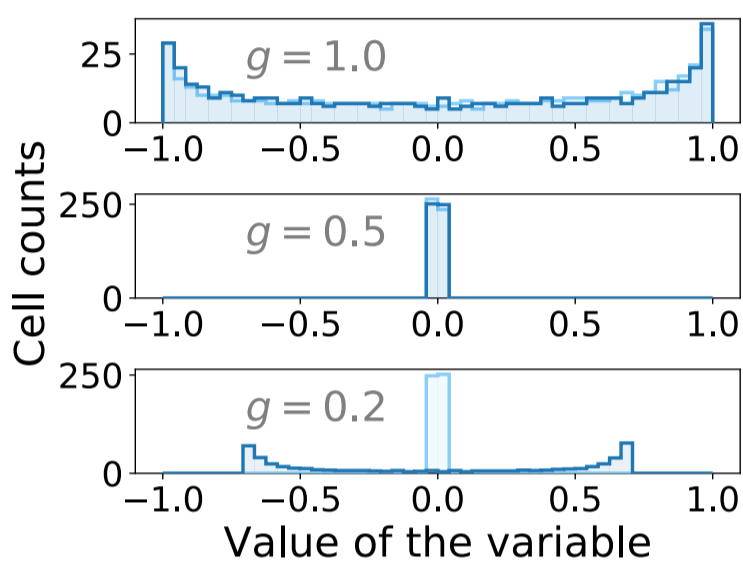

# Gene-free Model 4

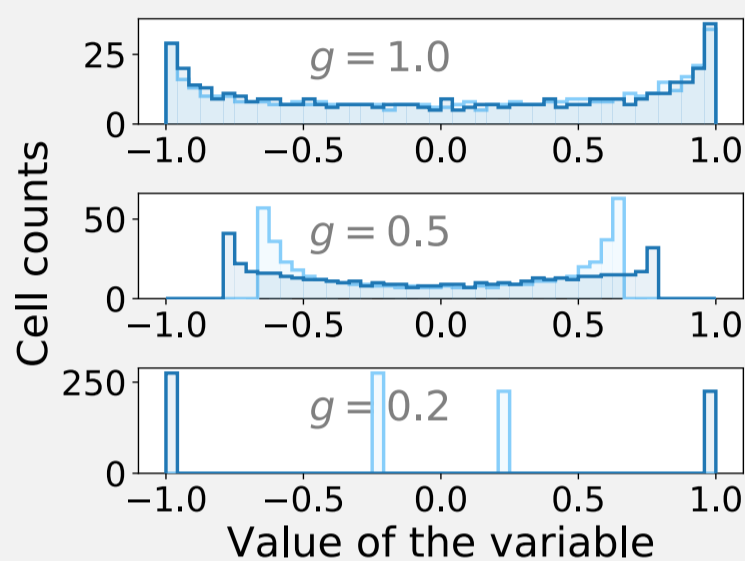

# B 3-gene Model 1

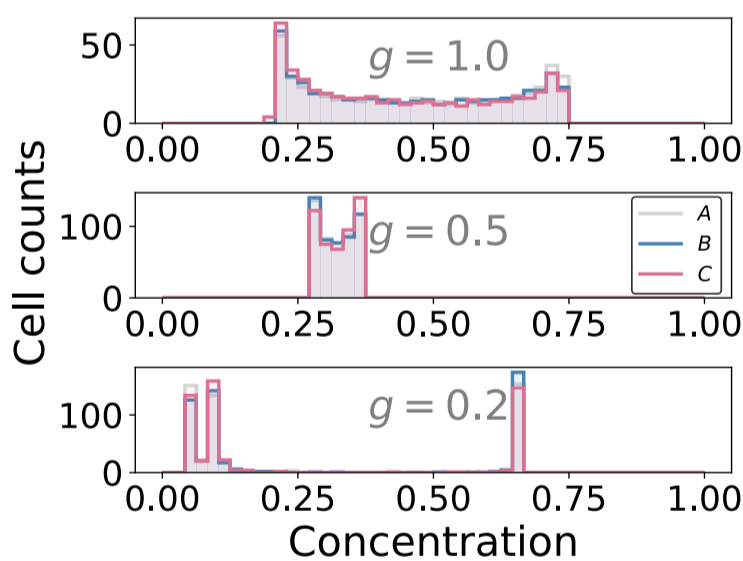

# 3-gene Model 2

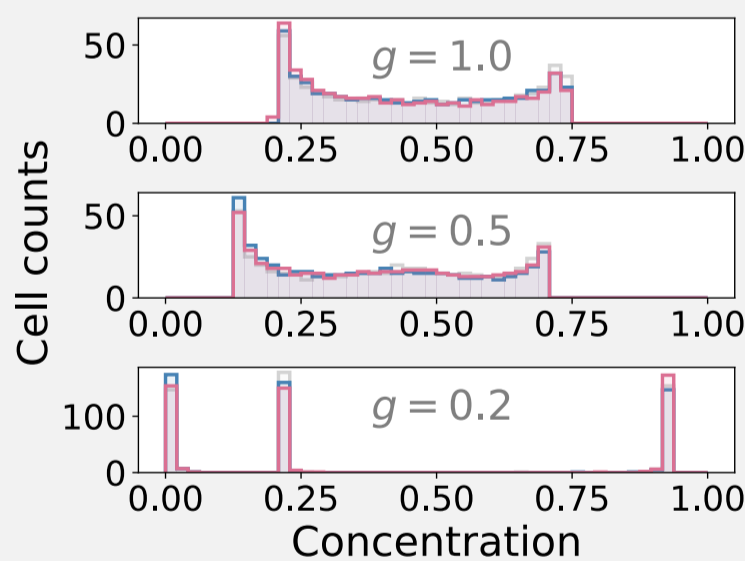

# 3-gene Model 1 (Hill functions)

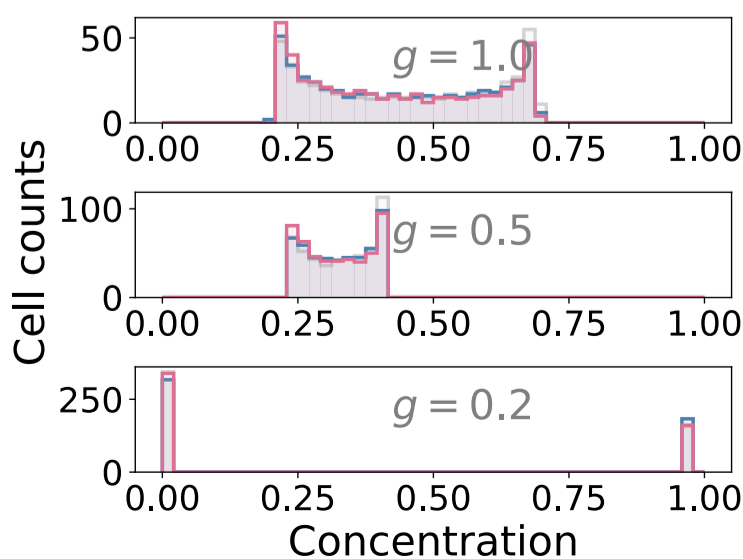

# 3-gene Model 2 (Hill functions)

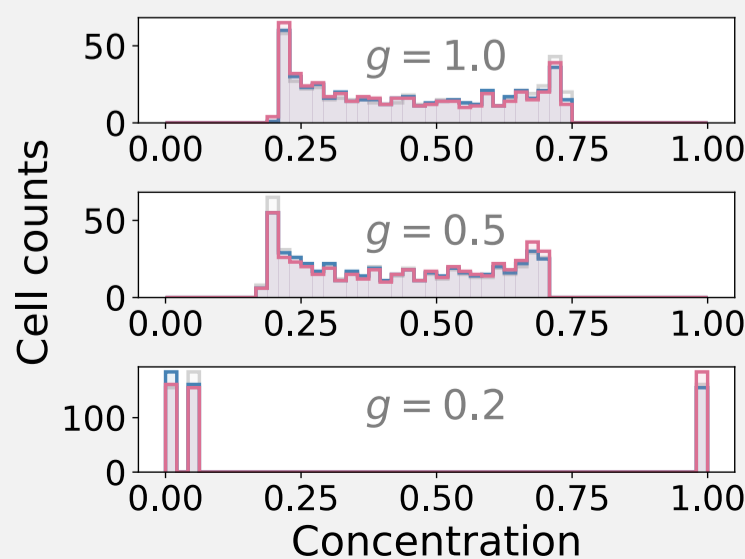

Supplement: supp [file elife-55778-supp-v1.zip › elife_poa_e55778_Figure_7_figure_supplement_2.pdf]
