# Supplementary material for: Geometric models for robust encoding of dynamical information into embryonic patterns
Source: eLife journal article supplement (doi:10.7554/elife.55778), 2020-08-10
Supplement: supp [file elife_poa_e55778_Figure_2_figure_supplement_1.pdf › elife_poa_e55778_Figure_2_figure_supplement_1.pdf]

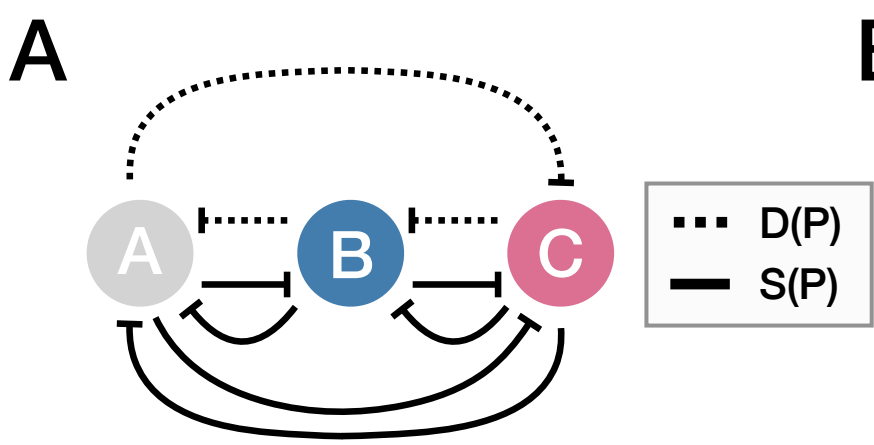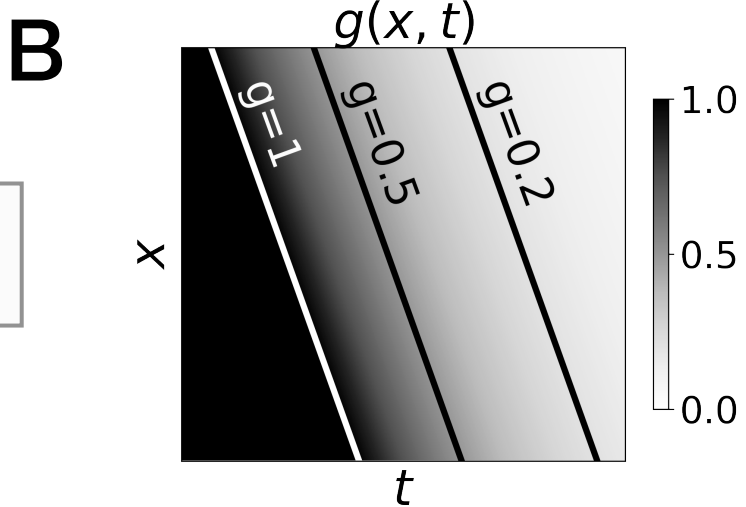

**Model 1  
(Hill functions)**

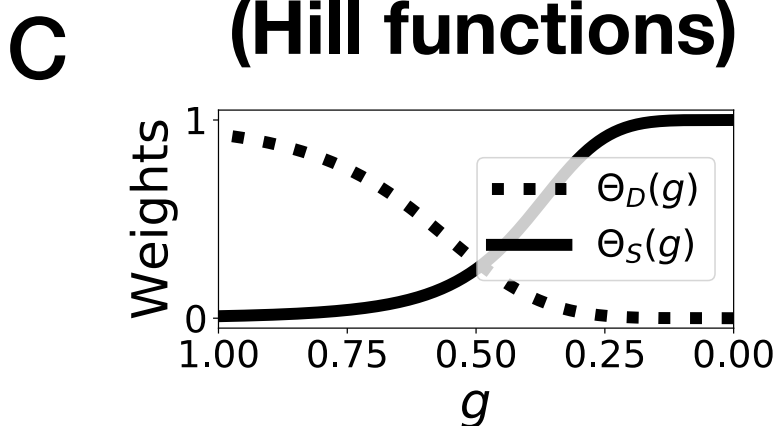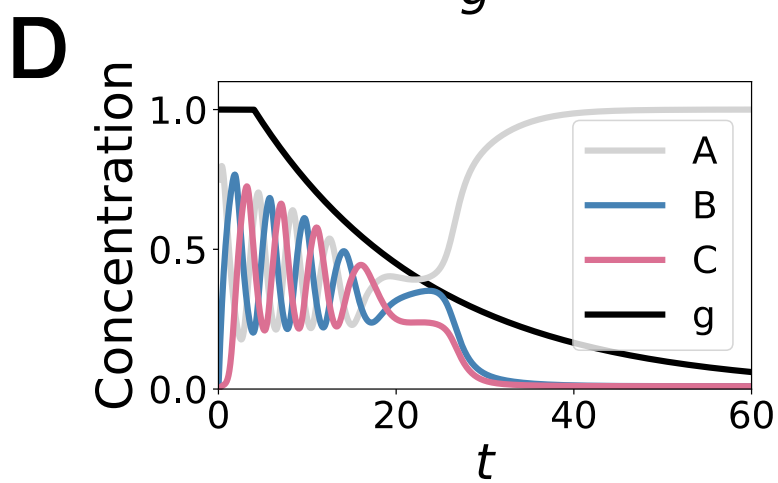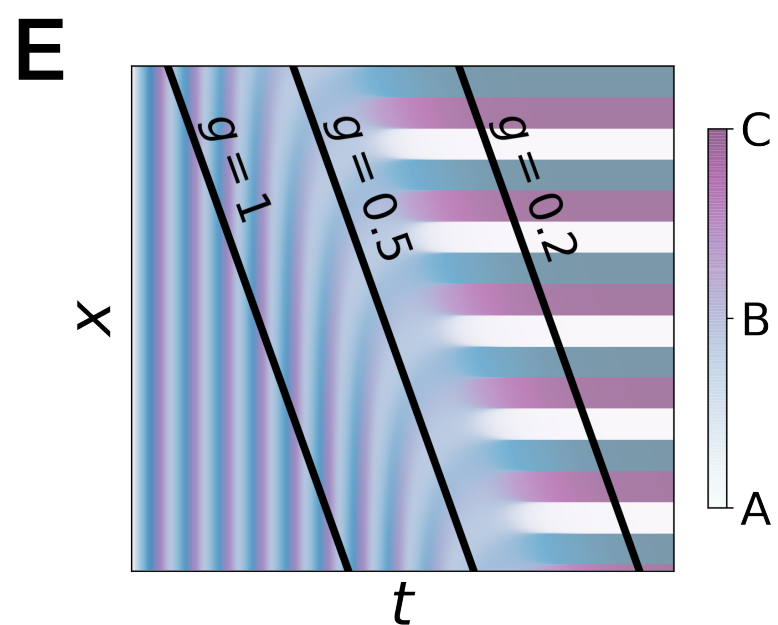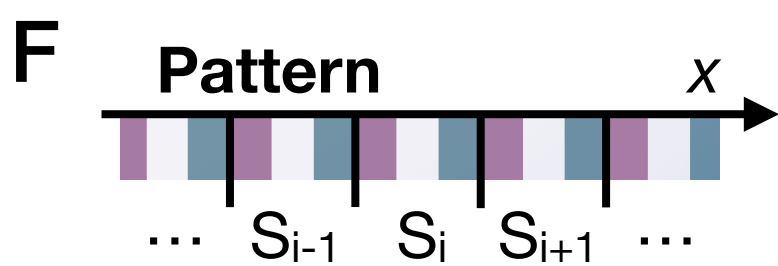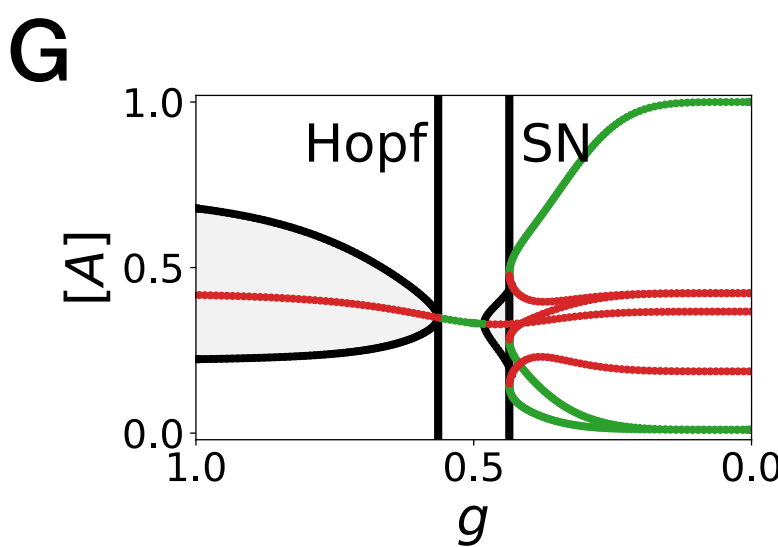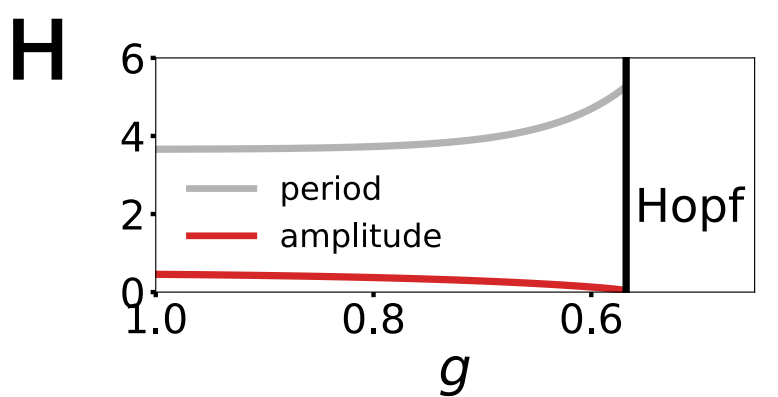

**Model 2  
(Hill functions)**

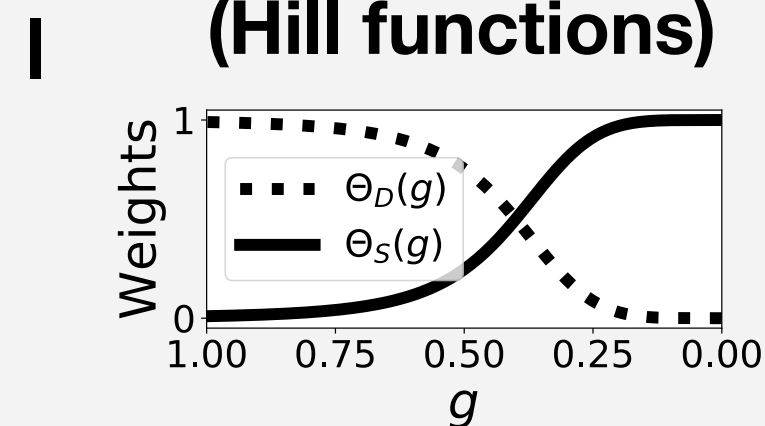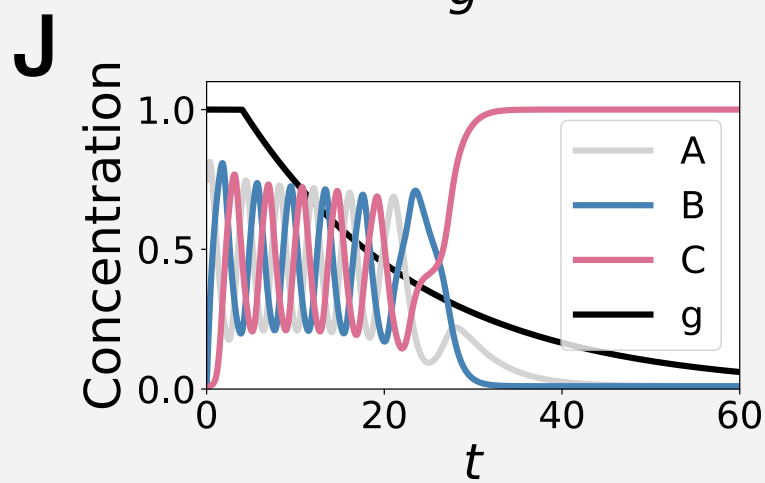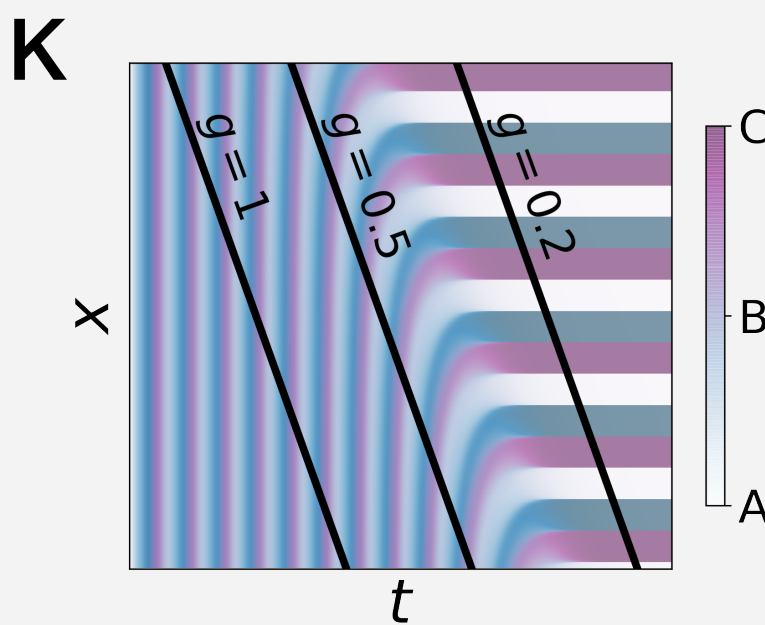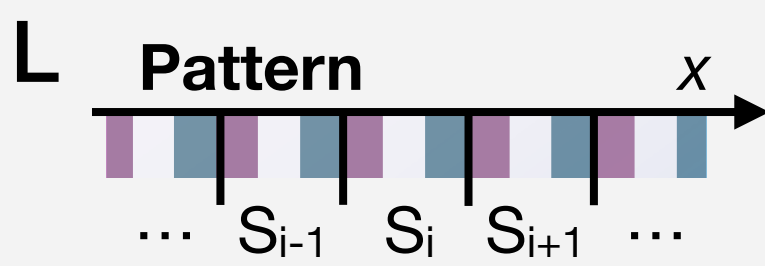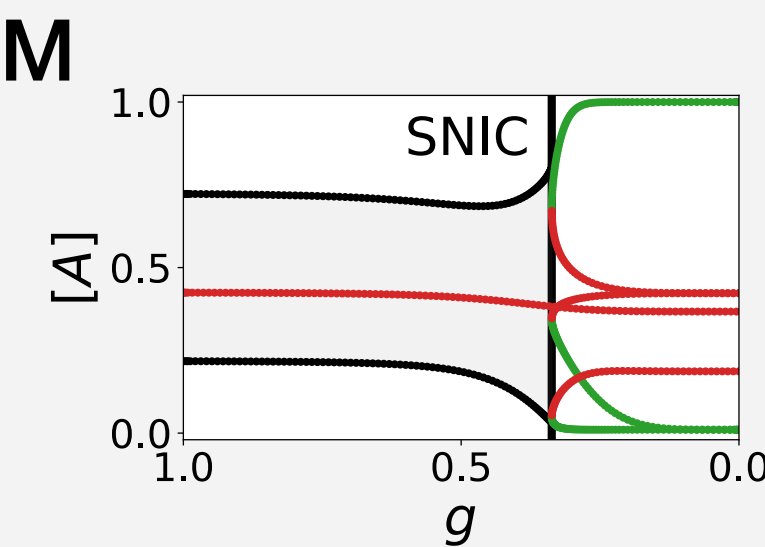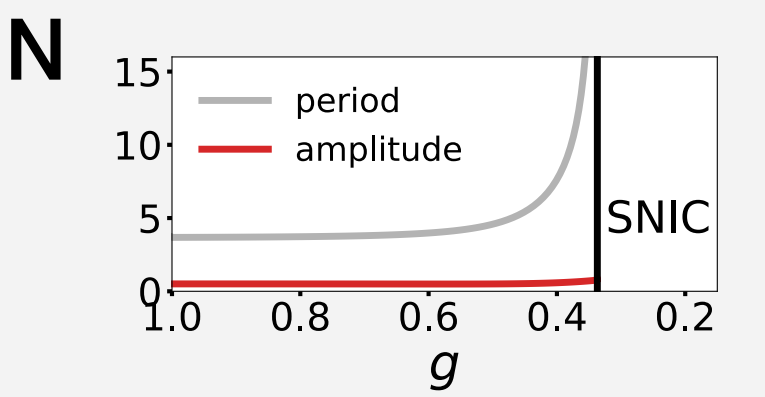

— stable fixed point — unstable fixed point — stable oscillations
