# Supplementary figures and images for: Geometric models for robust encoding of dynamical information into embryonic patterns
Source: eLife journal article supplement (doi:10.7554/elife.55778), 2020-08-10

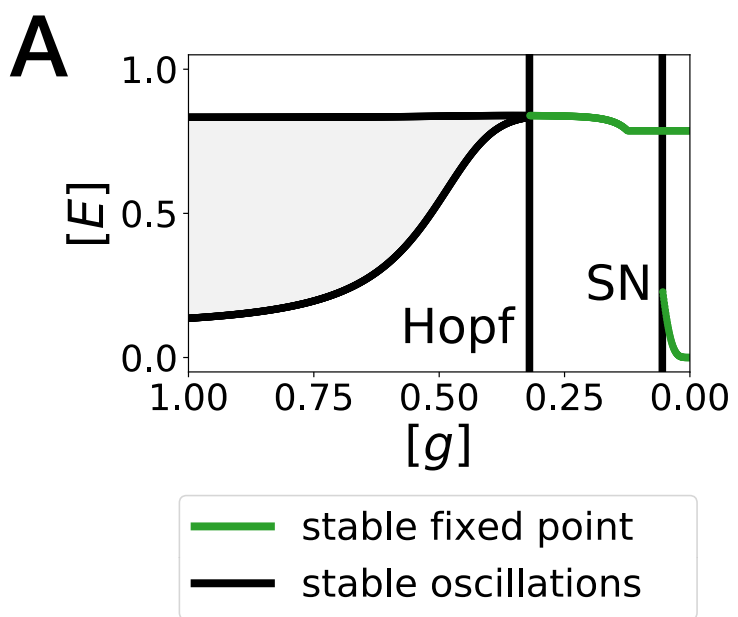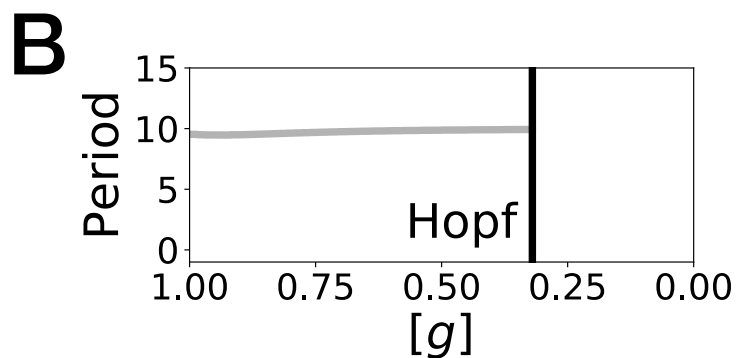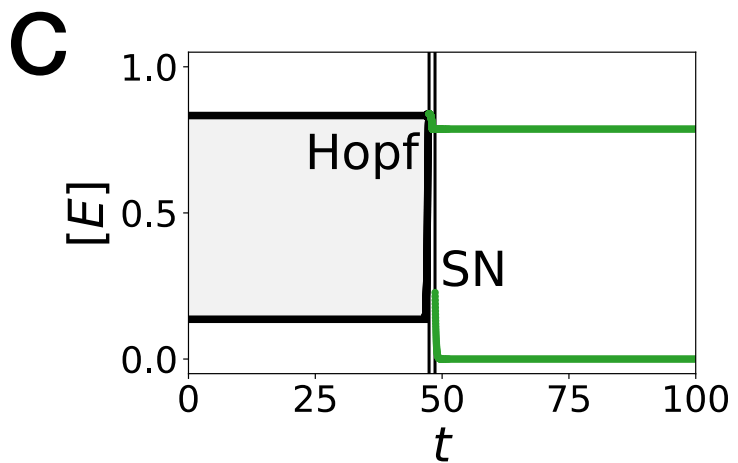

Supplement: supp [file elife-55778-supp-v1.zip › elife_poa_e55778_Figure_1_figure_supplement_1.pdf]

**A**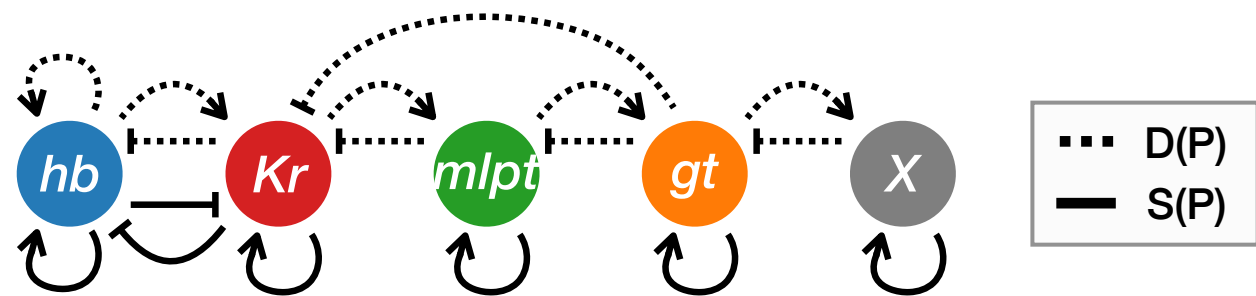**B**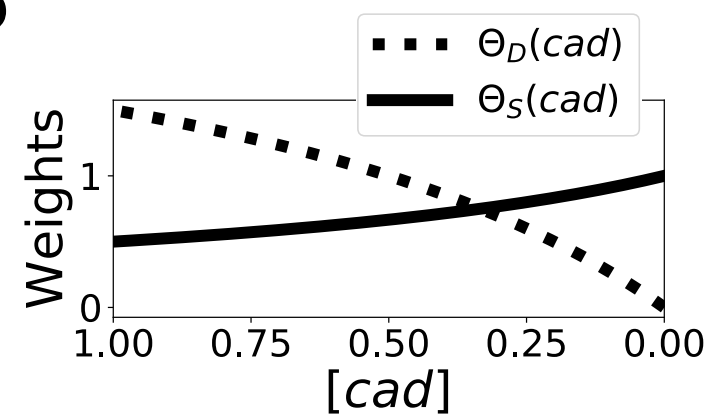**C**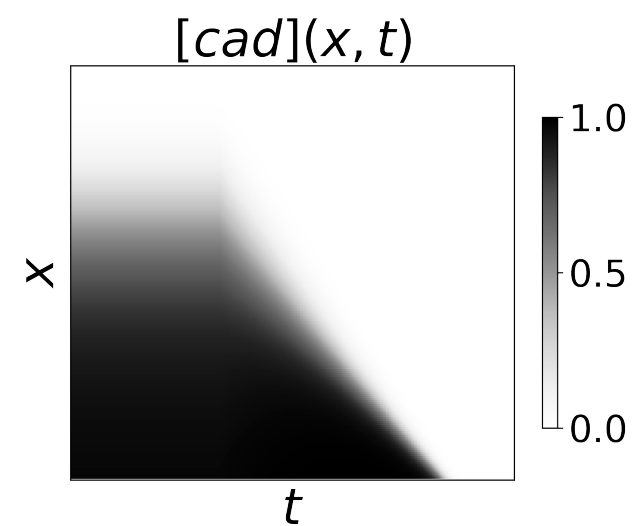**D**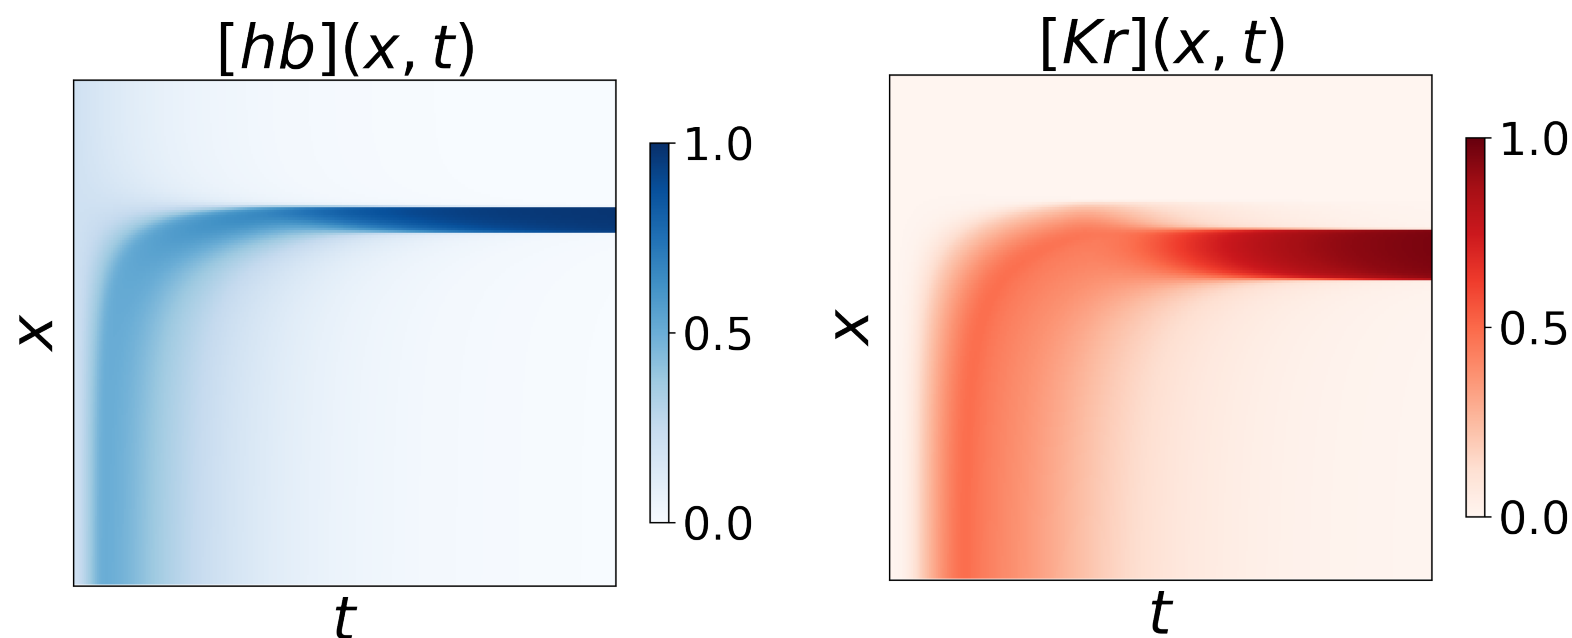**E**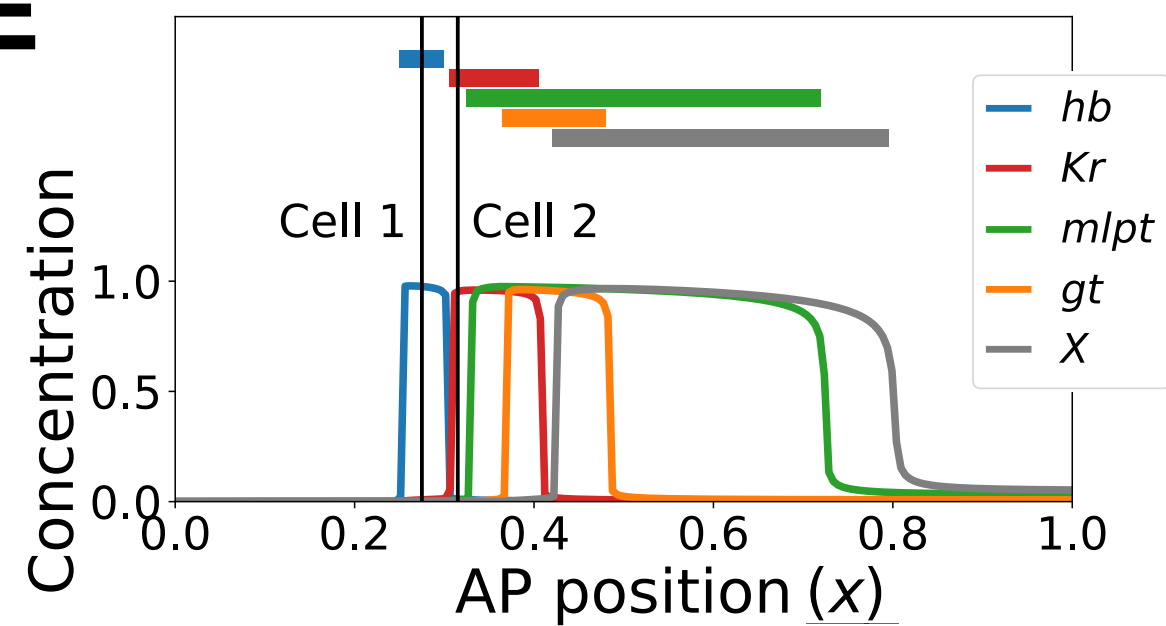**F**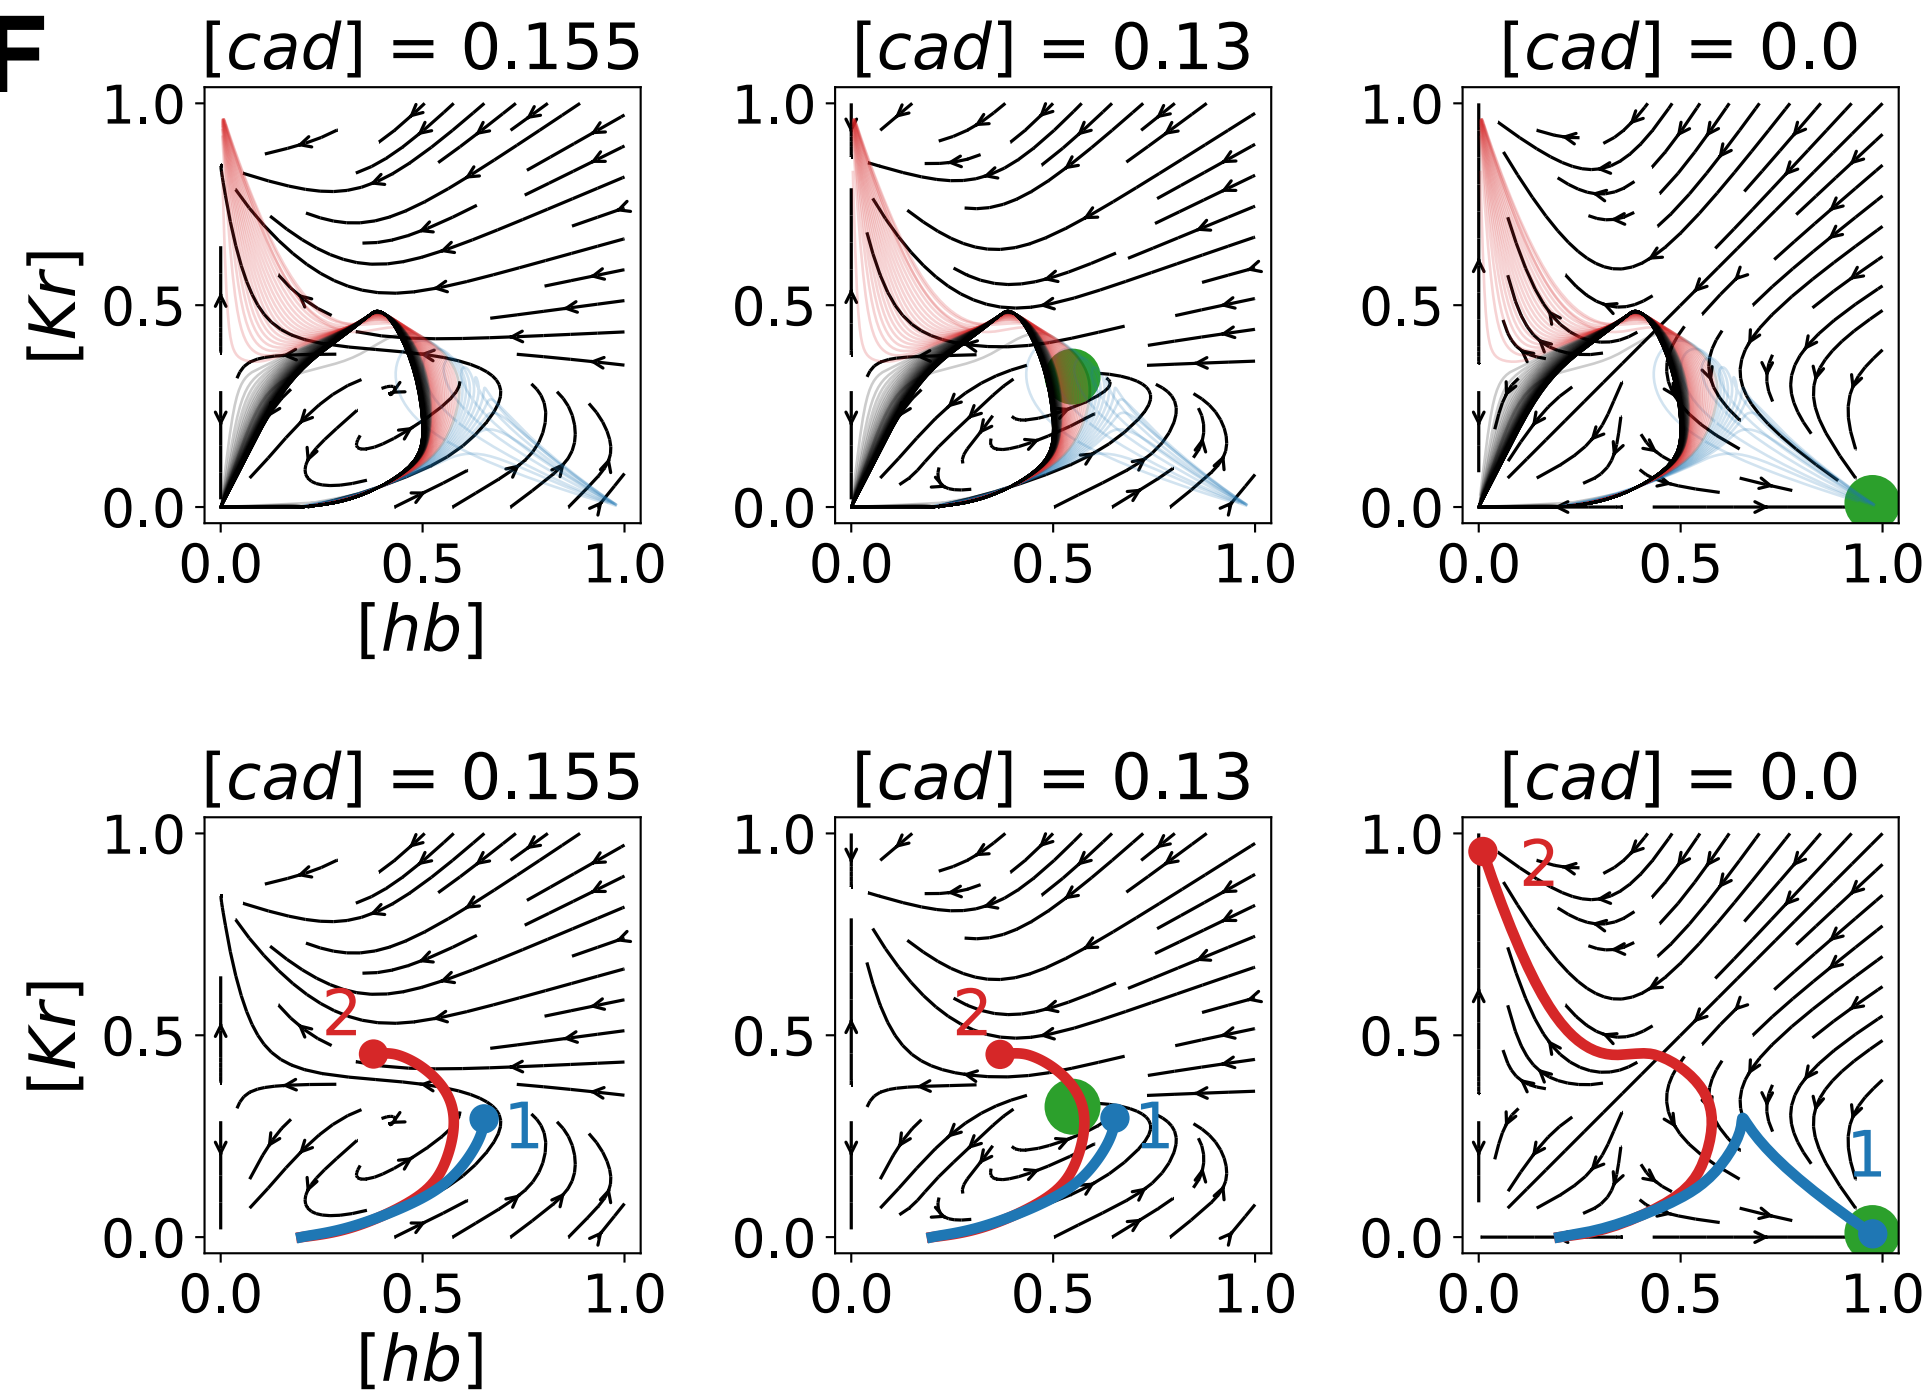**G**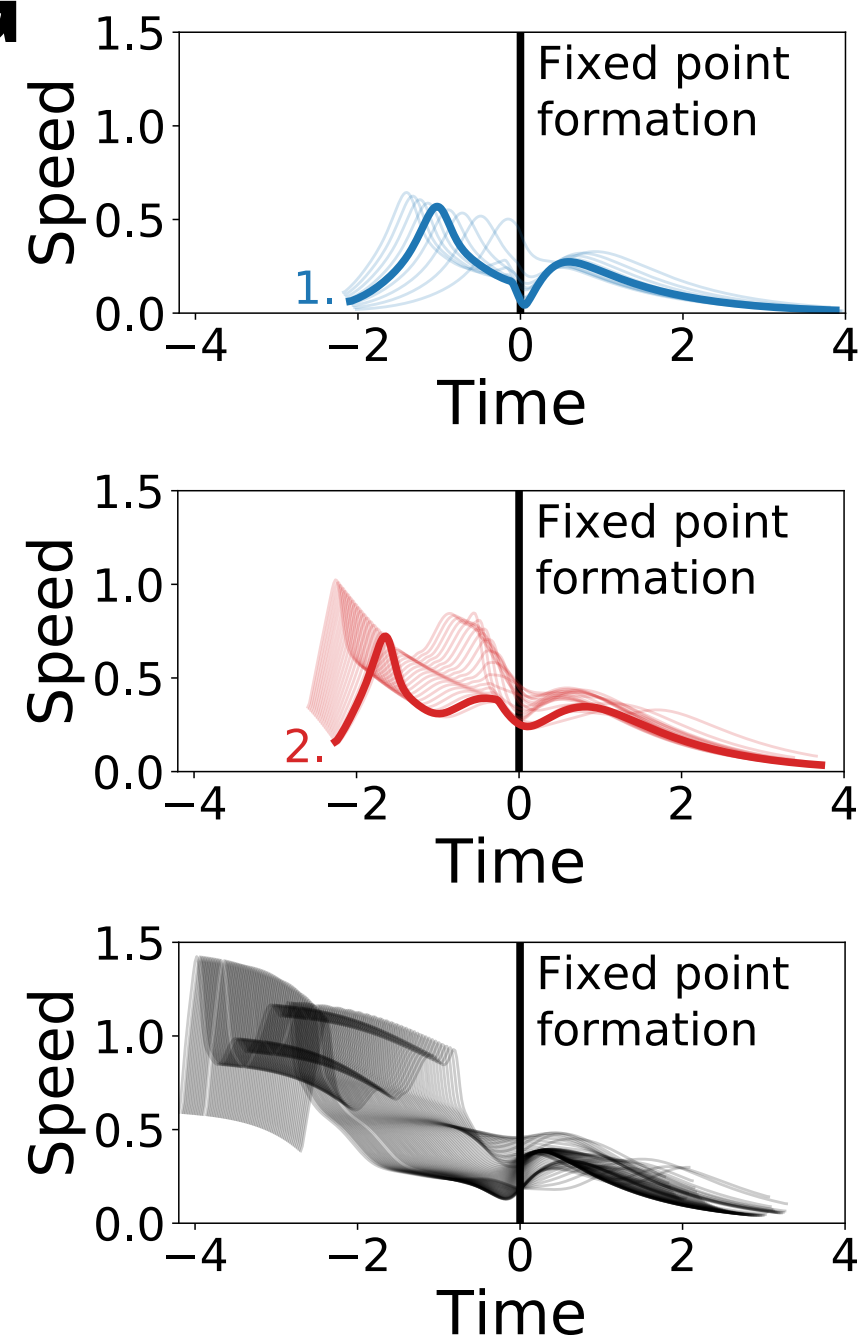

Supplement: supp [file elife-55778-supp-v1.zip › elife_poa_e55778_Figure_1_figure_supplement_2.pdf]

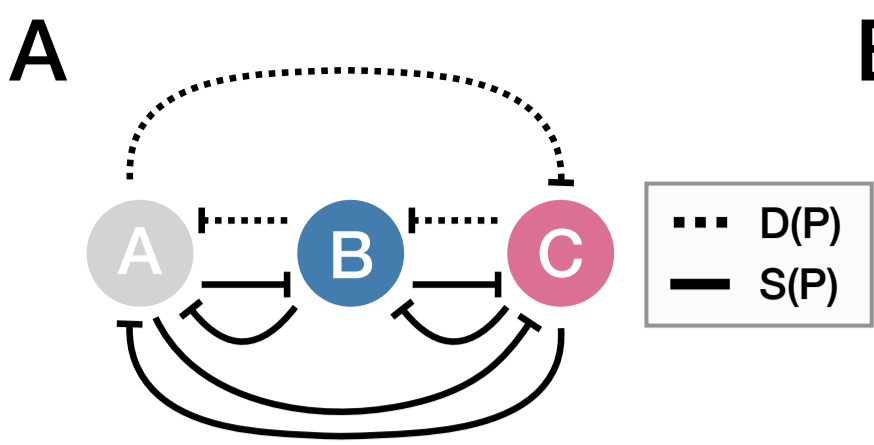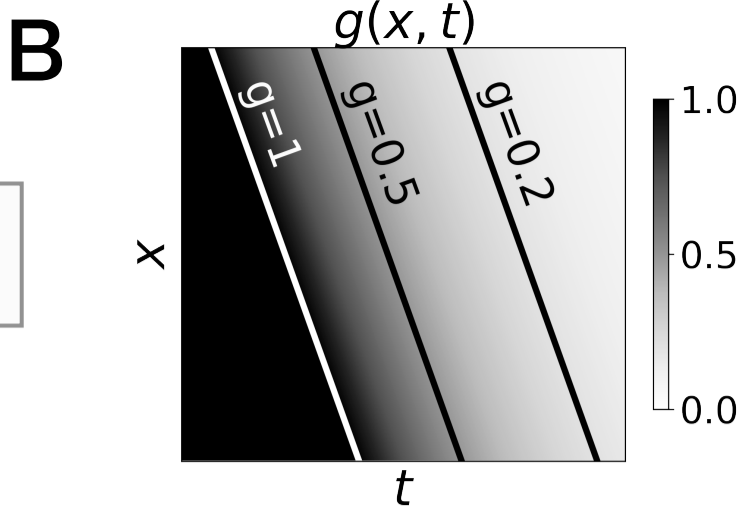

**Model 1  
(Hill functions)**

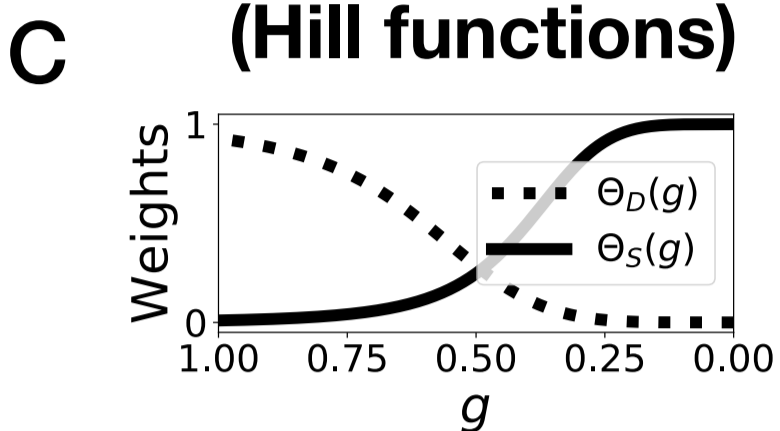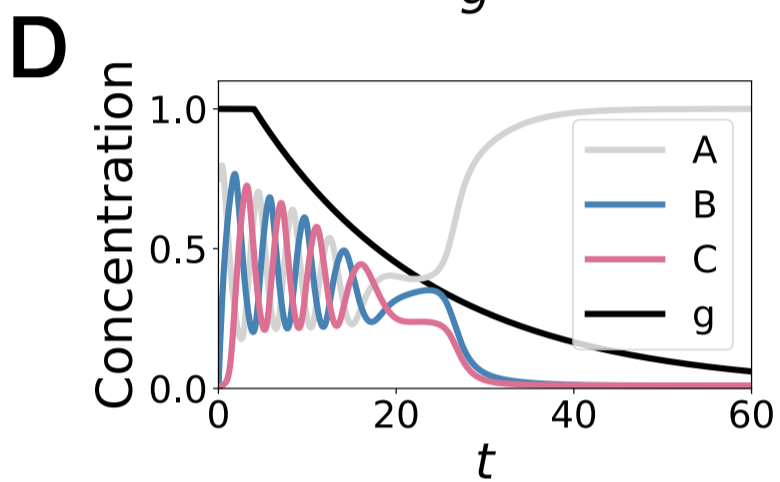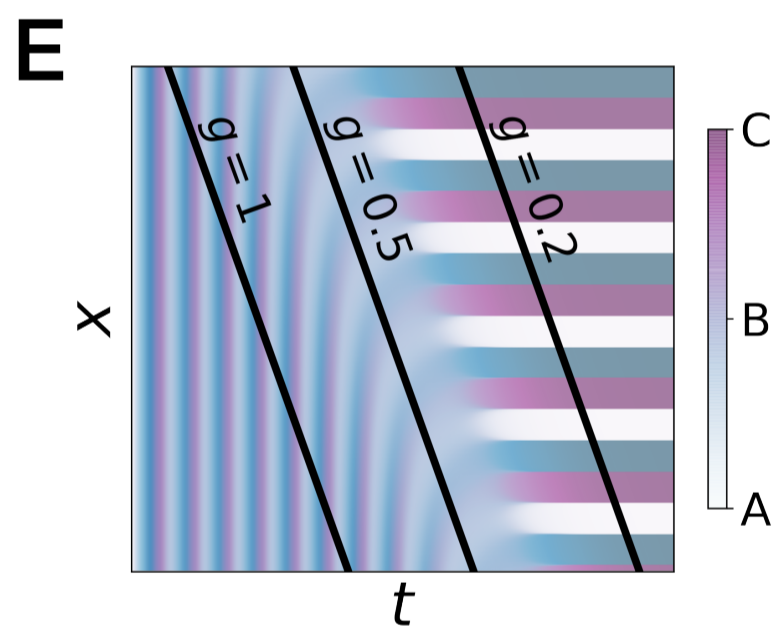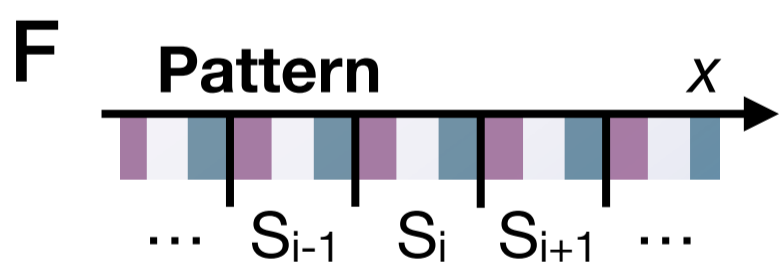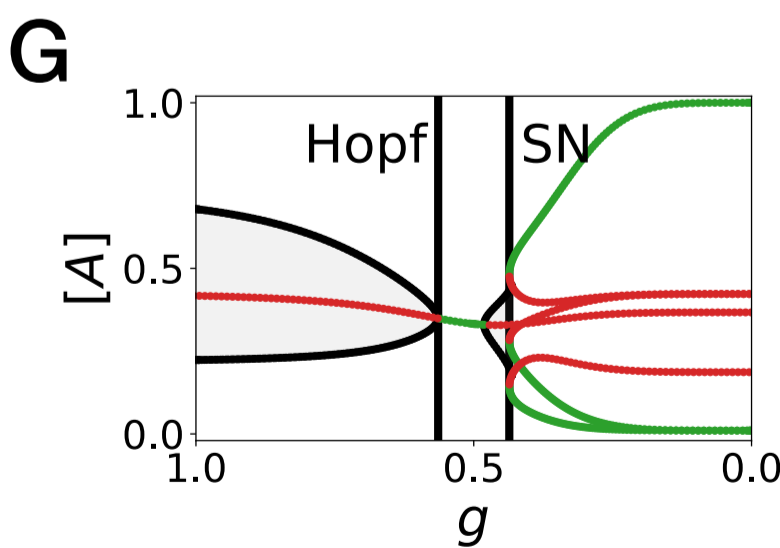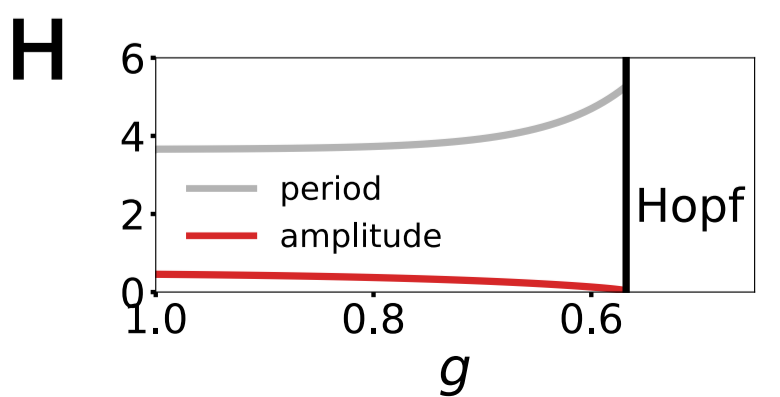

**Model 2  
(Hill functions)**

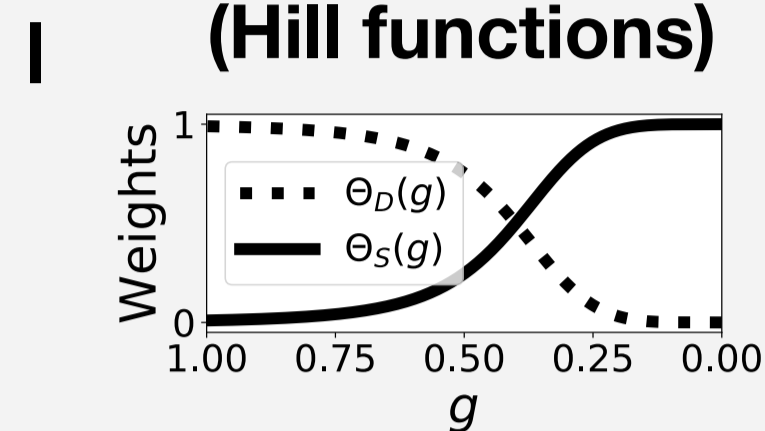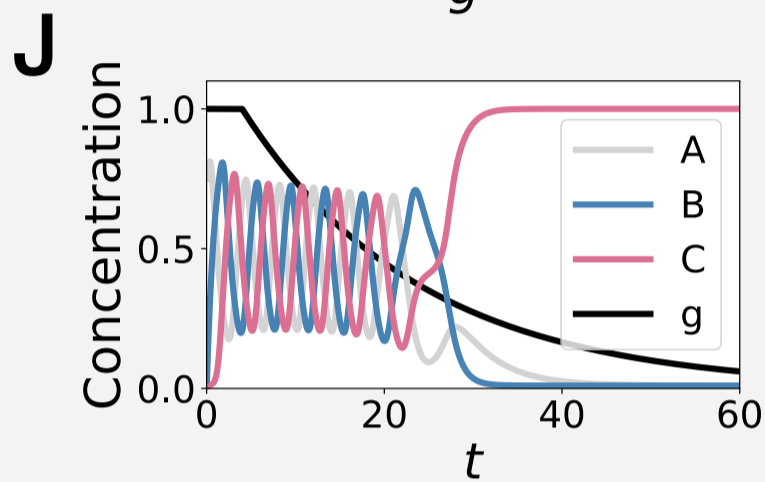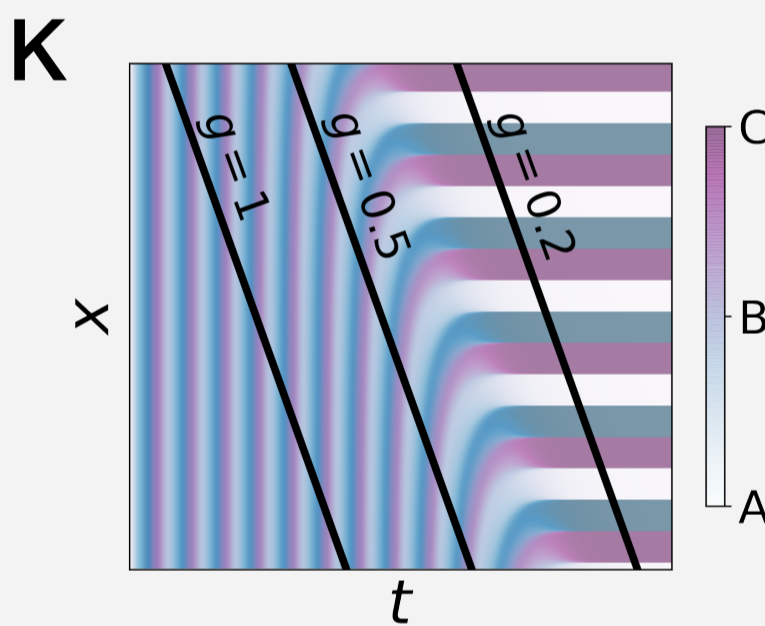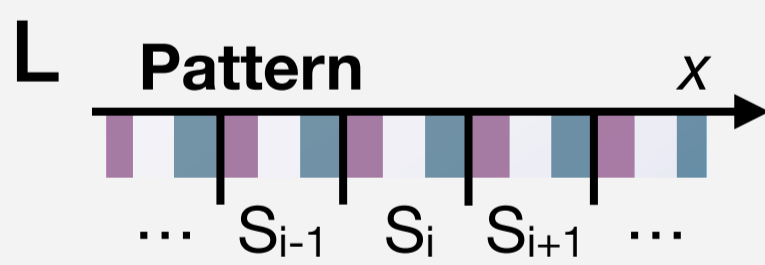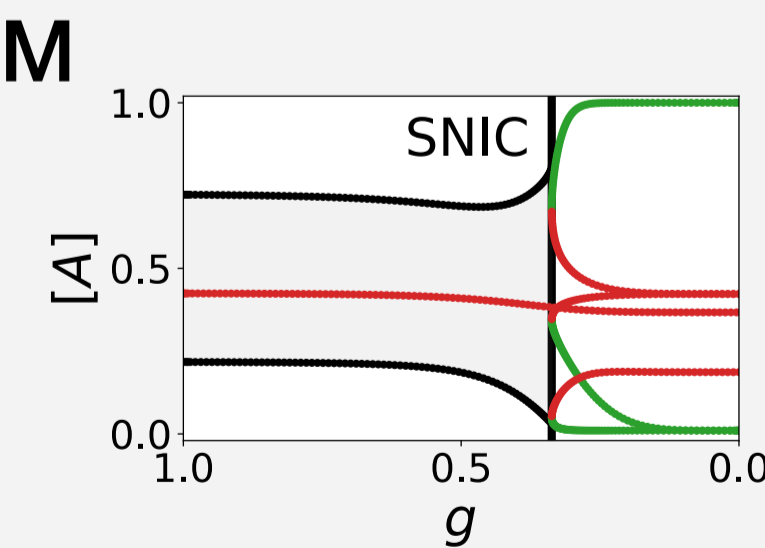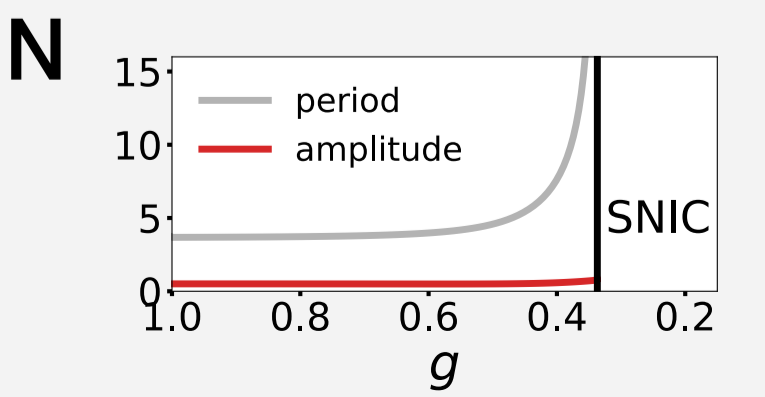

Supplement: supp [file elife-55778-supp-v1.zip › elife_poa_e55778_Figure_2_figure_supplement_1.pdf]

Normalized  
peak-to-peak  
frequency

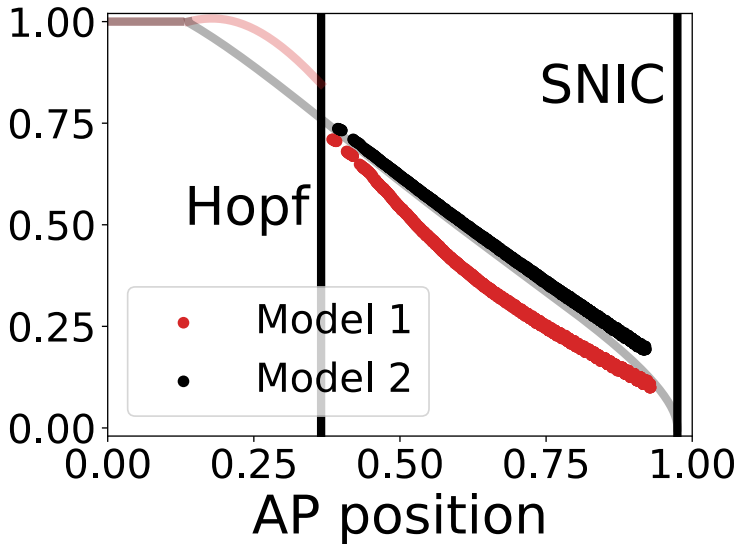

Supplement: supp [file elife-55778-supp-v1.zip › elife_poa_e55778_Figure_2_figure_supplement_2.pdf]

## Model 1 (Hill functions)

## Model 2 (Hill functions)

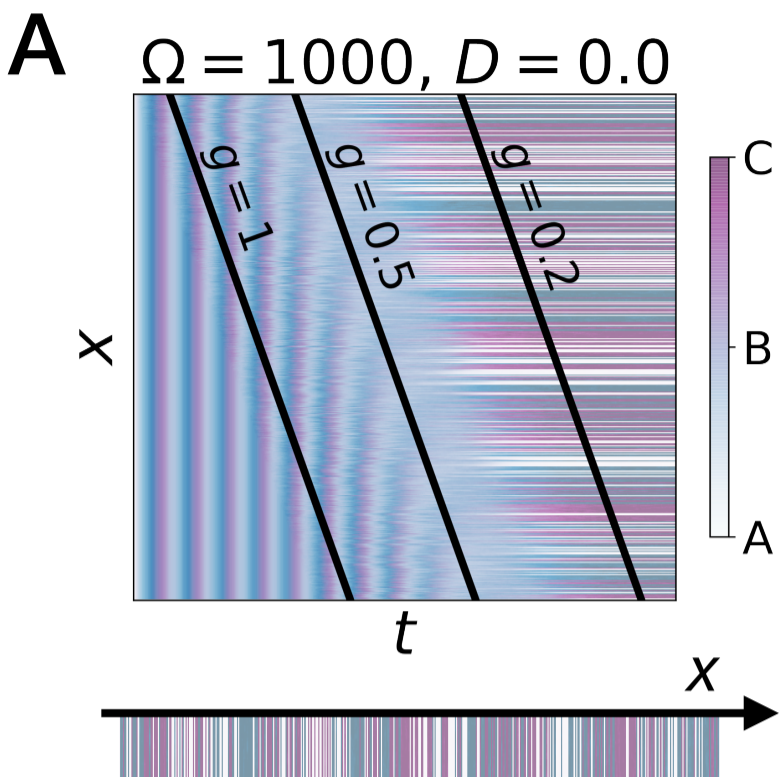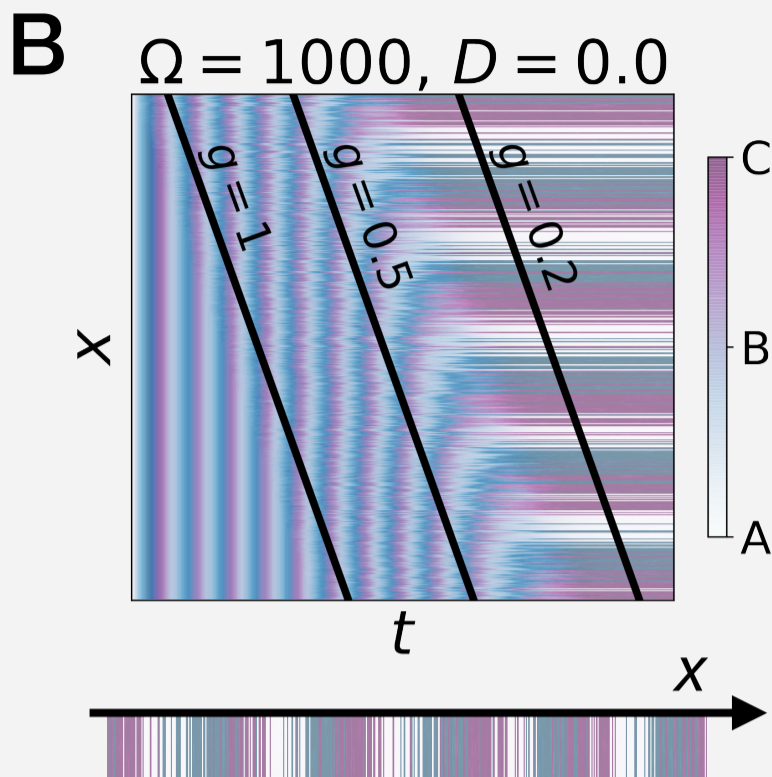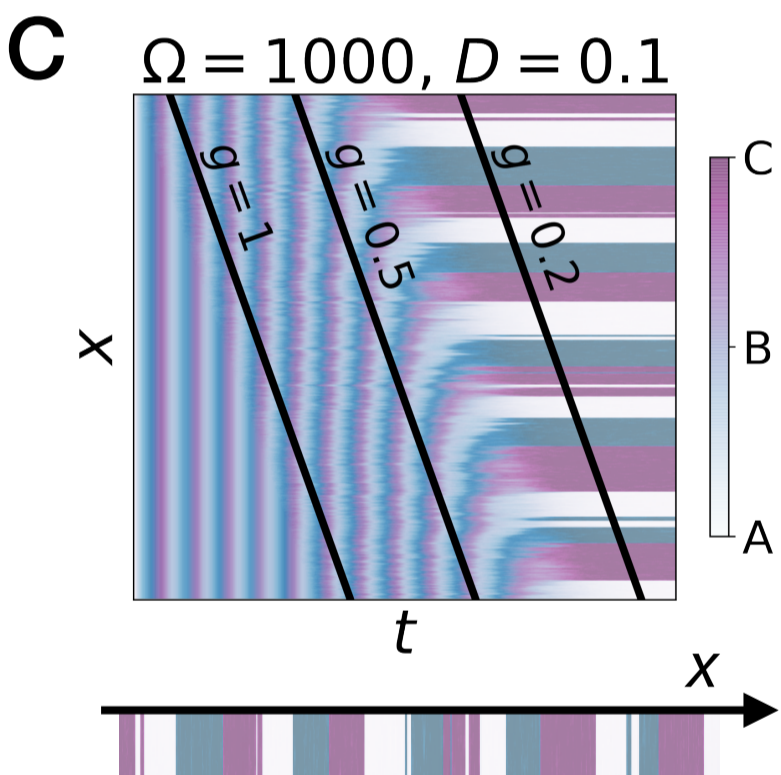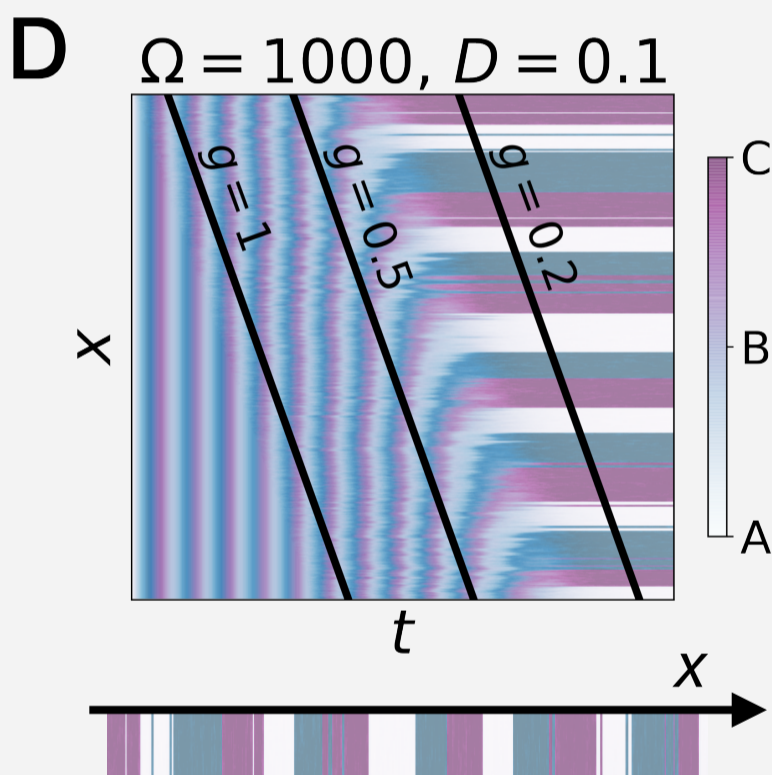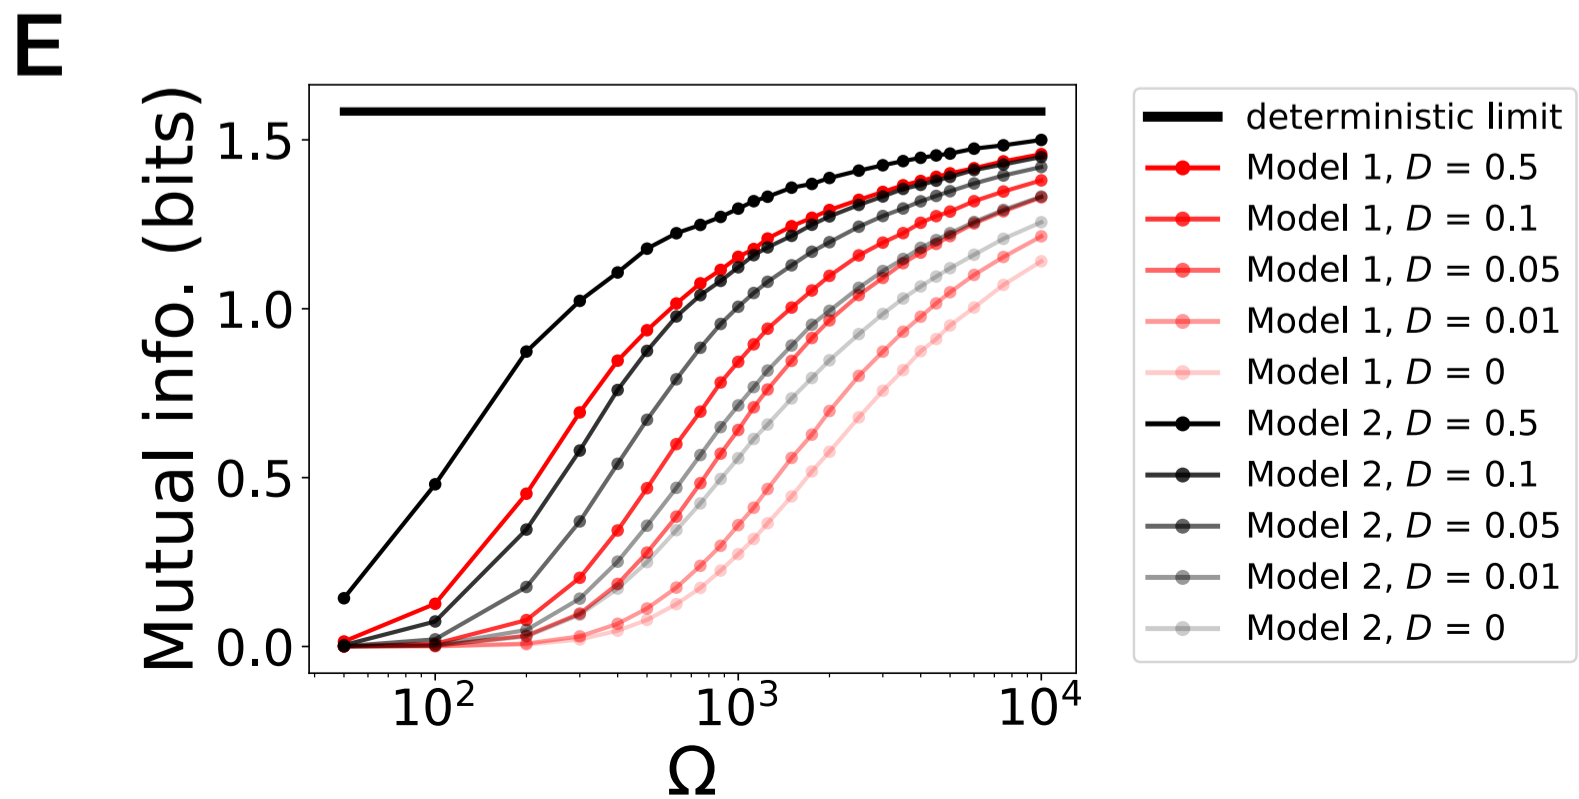

Supplement: supp [file elife-55778-supp-v1.zip › elife_poa_e55778_Figure_3_figure_supplement_1.pdf]

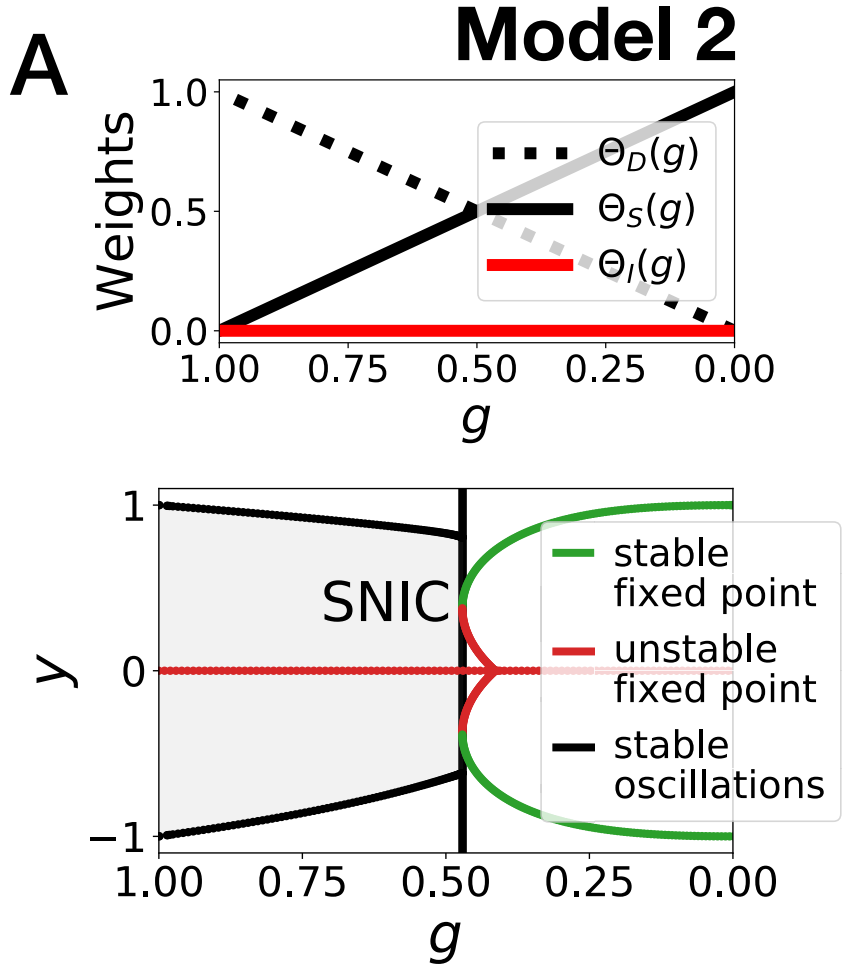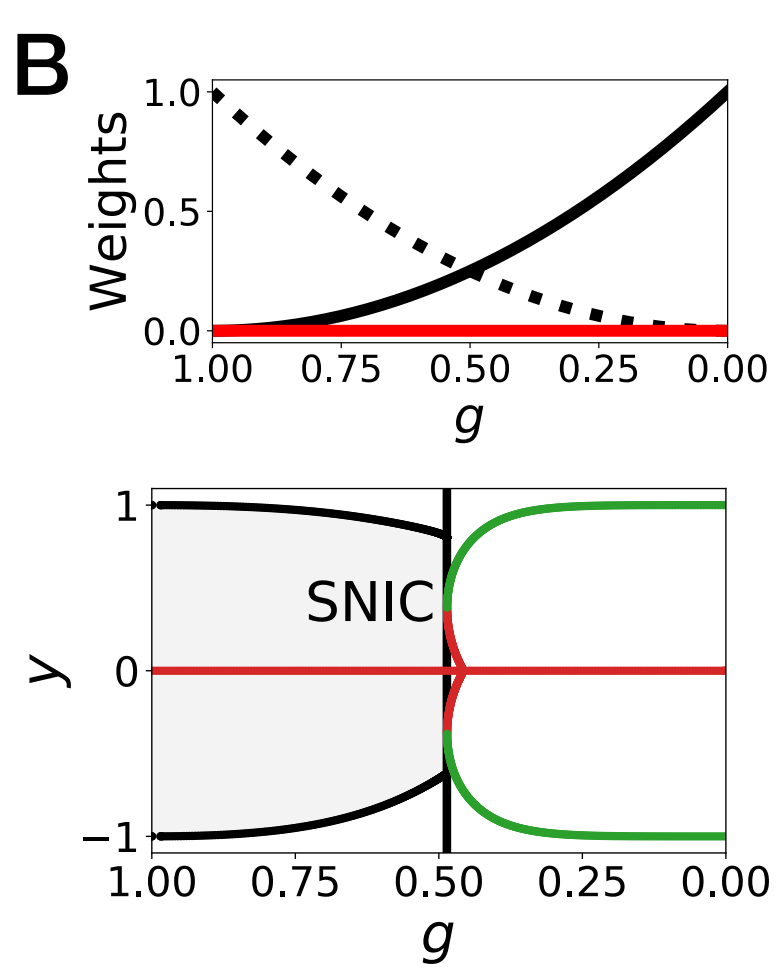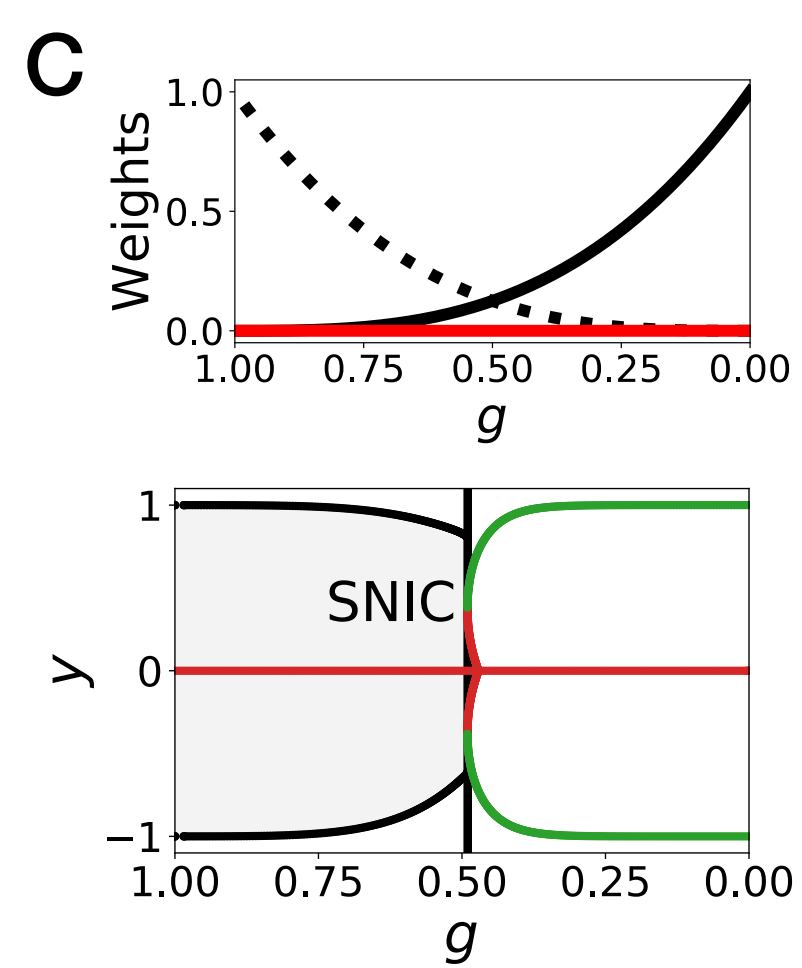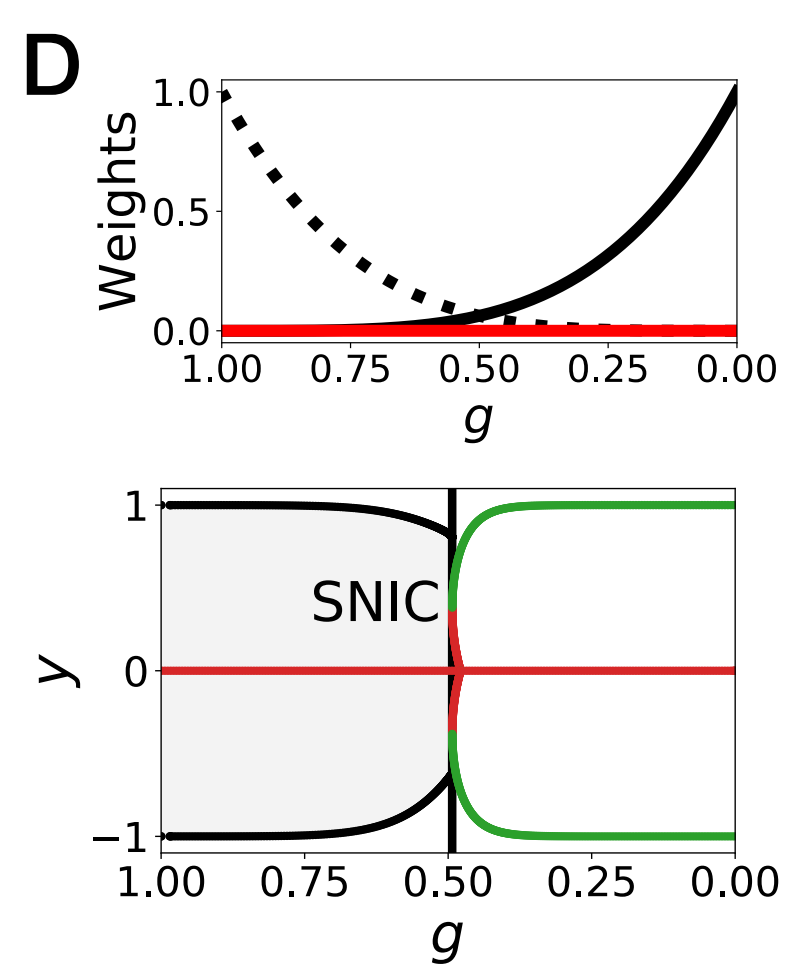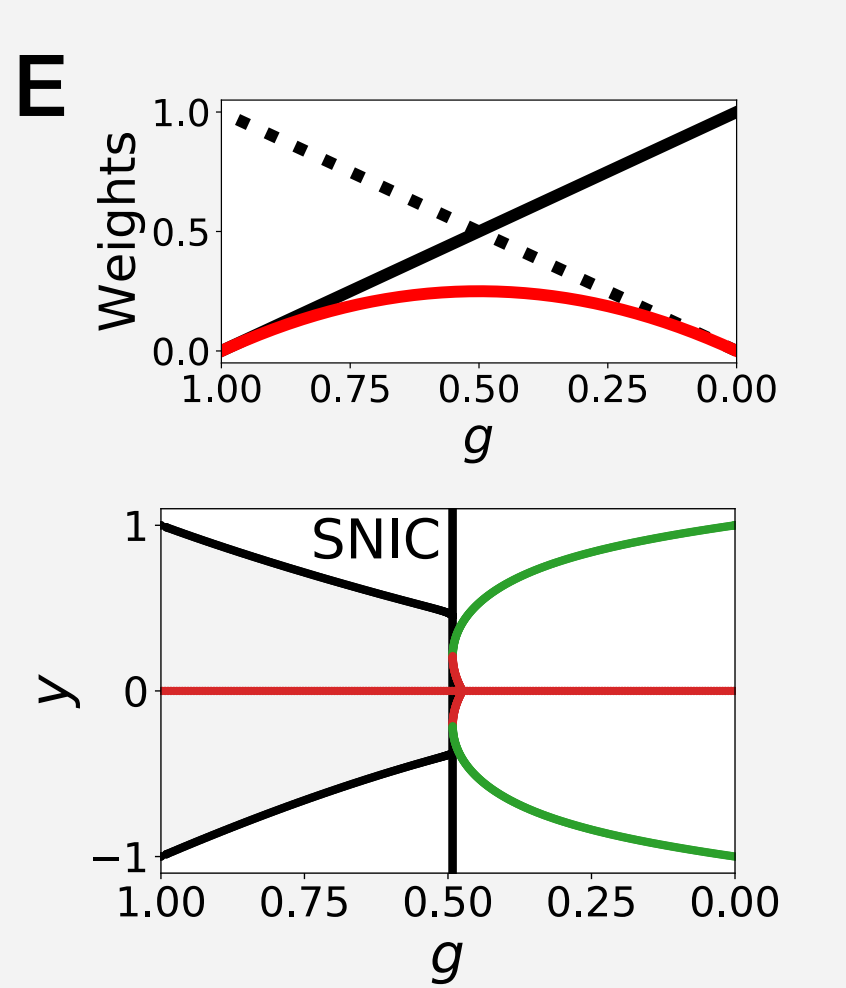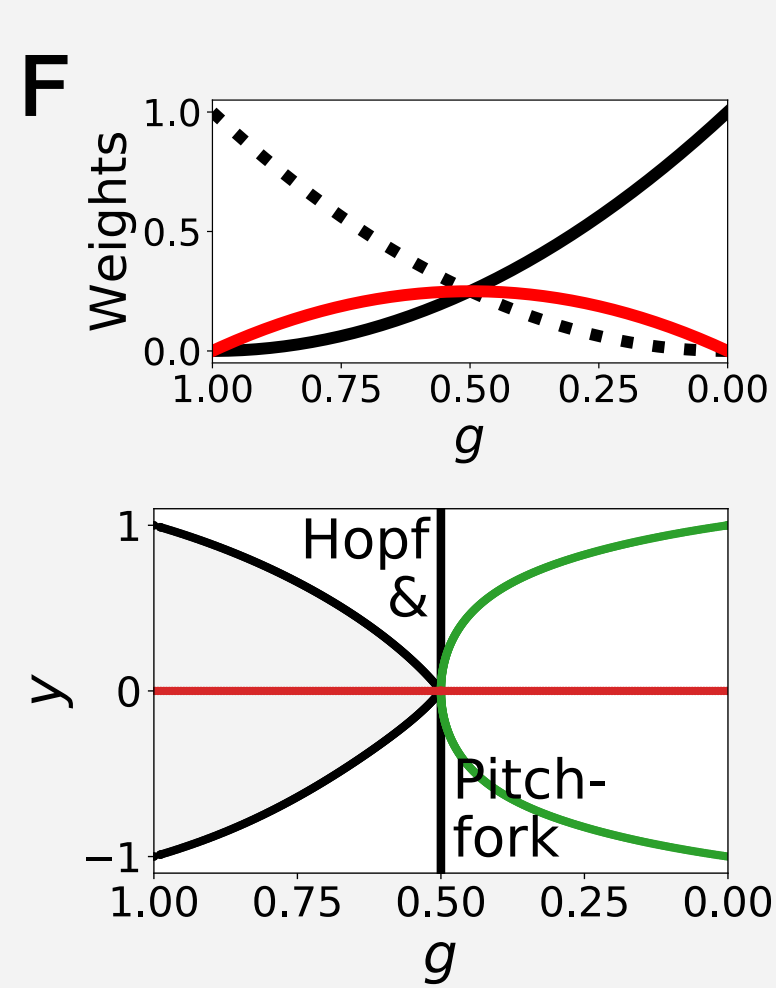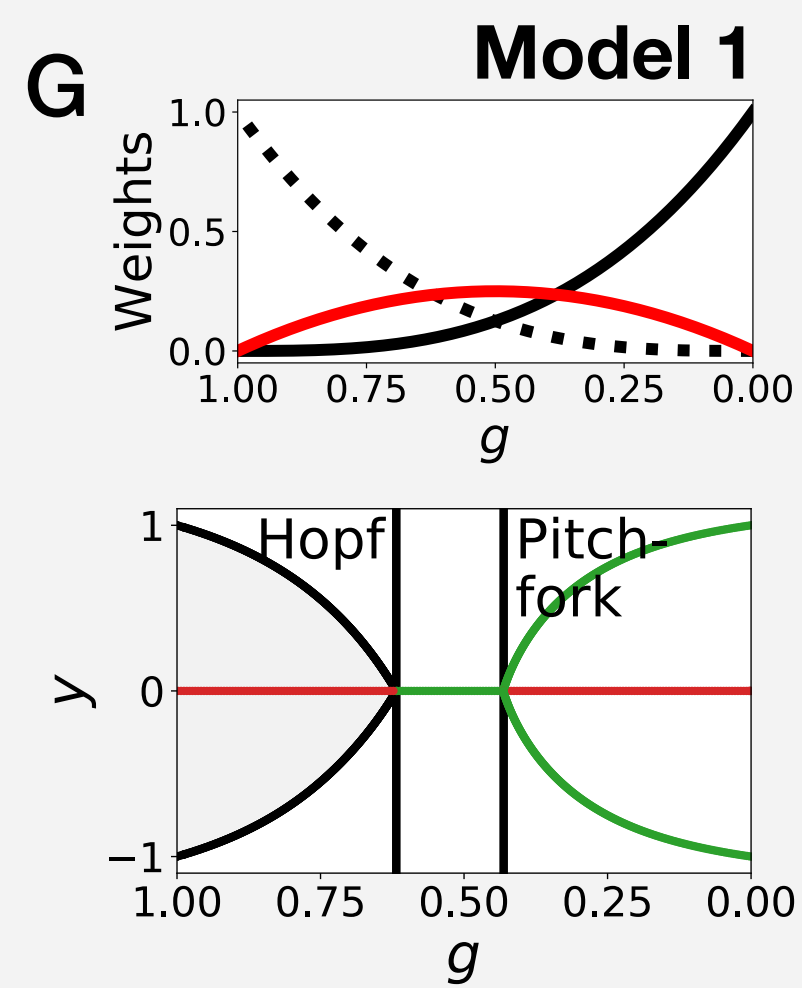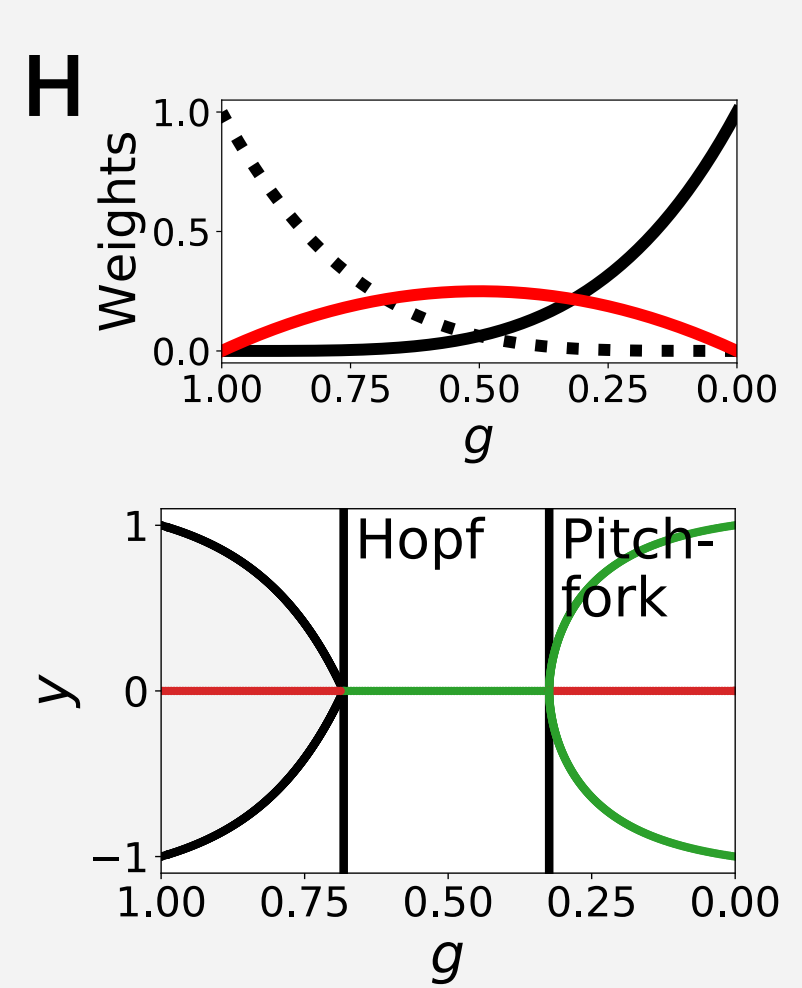

Supplement: supp [file elife-55778-supp-v1.zip › elife_poa_e55778_Figure_4_figure_supplement_1.pdf]

Gene-free Model 3

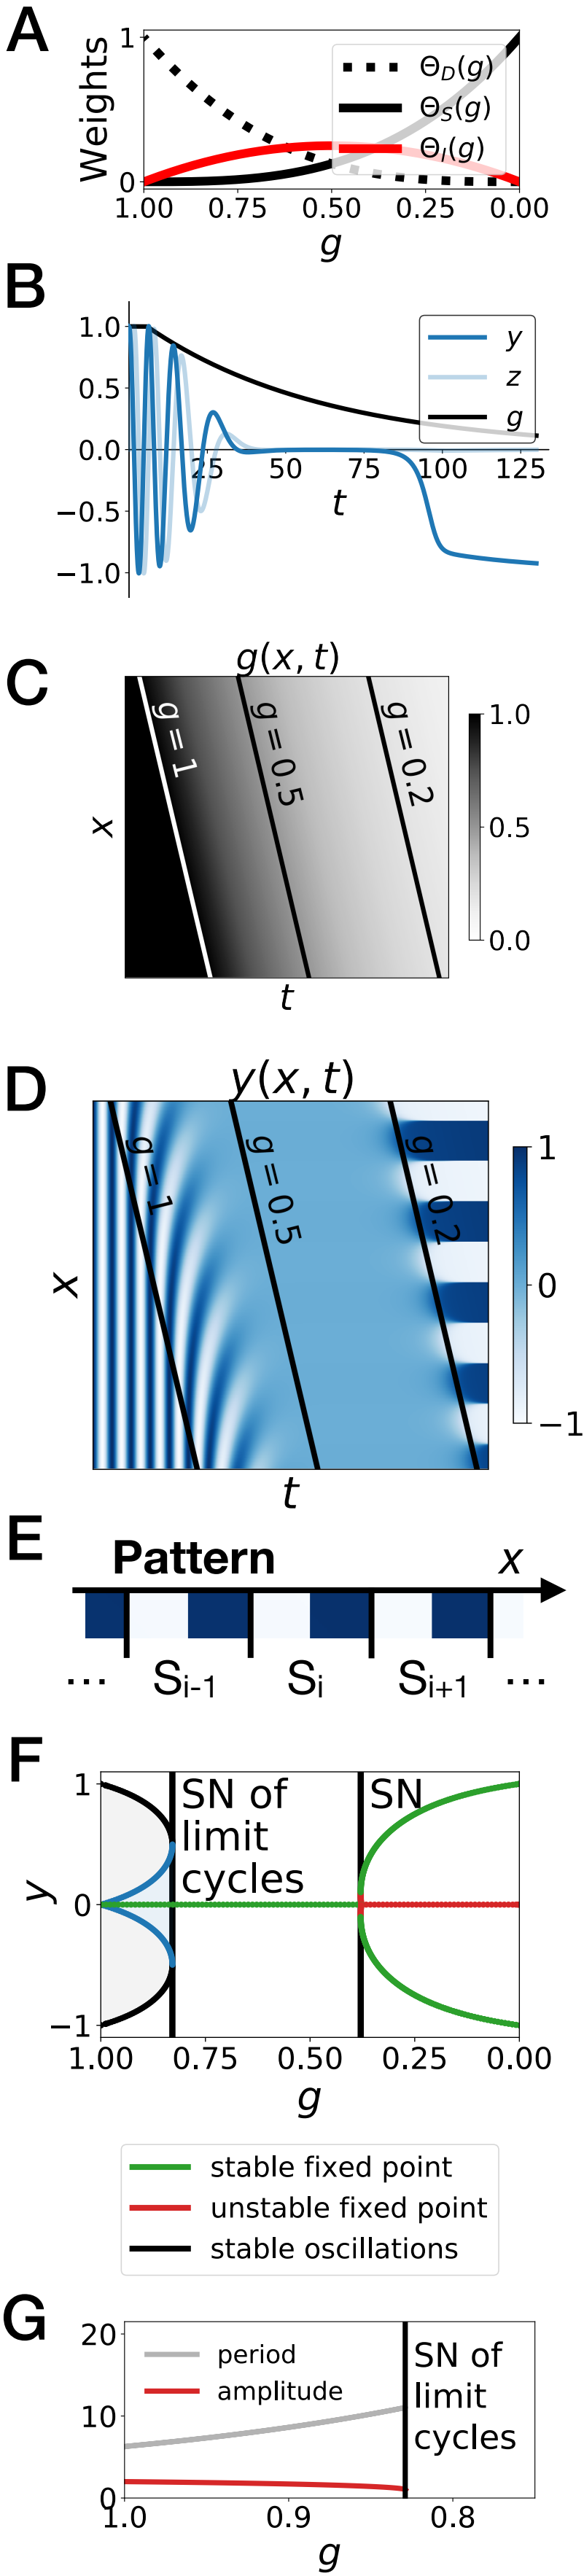

Flow plots

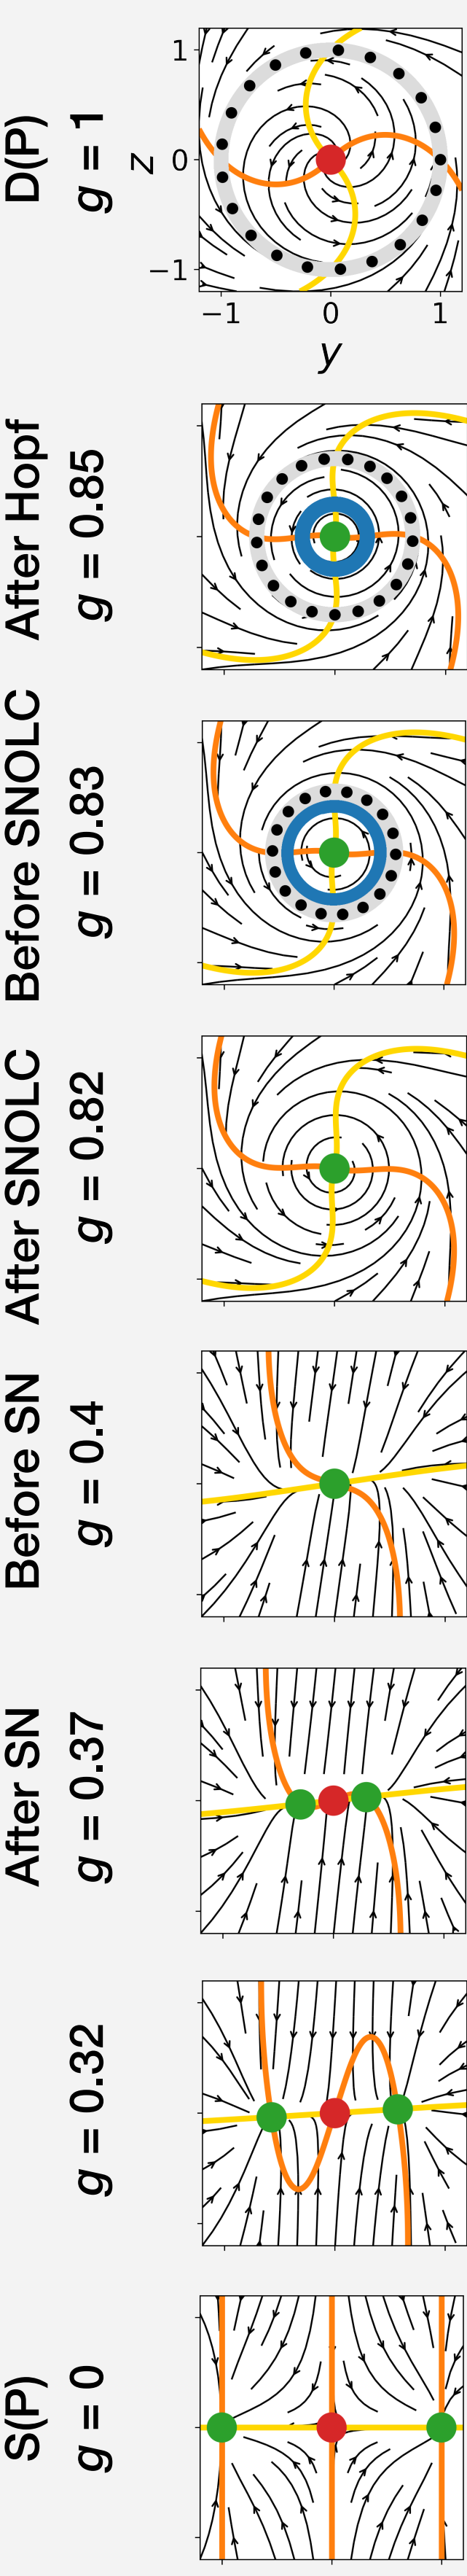

Supplement: supp [file elife-55778-supp-v1.zip › elife_poa_e55778_Figure_4_figure_supplement_3.pdf]

# Gene-free Model 4

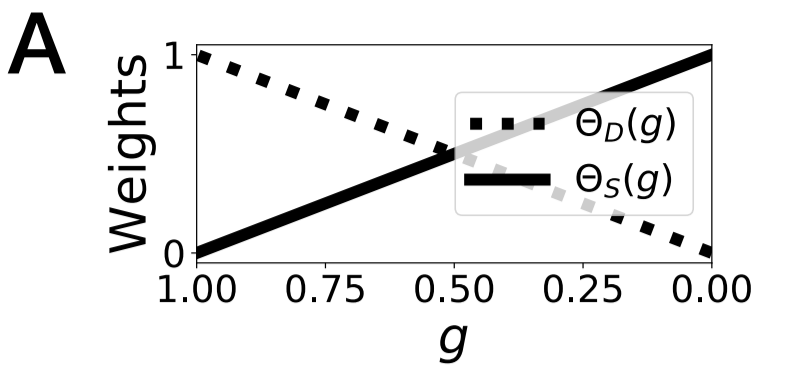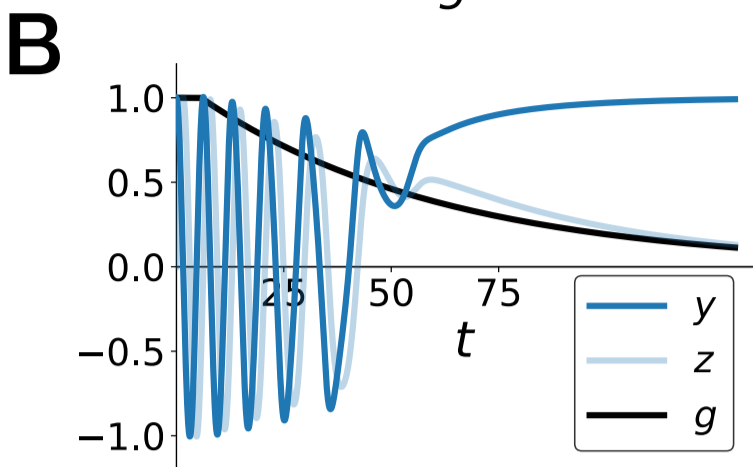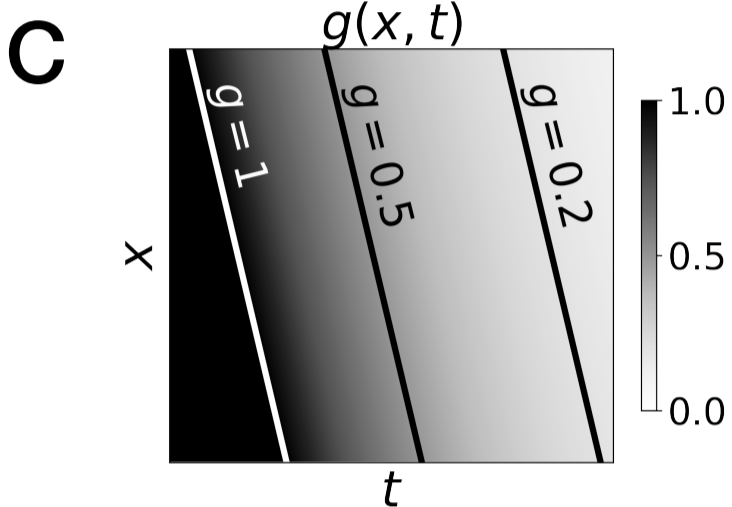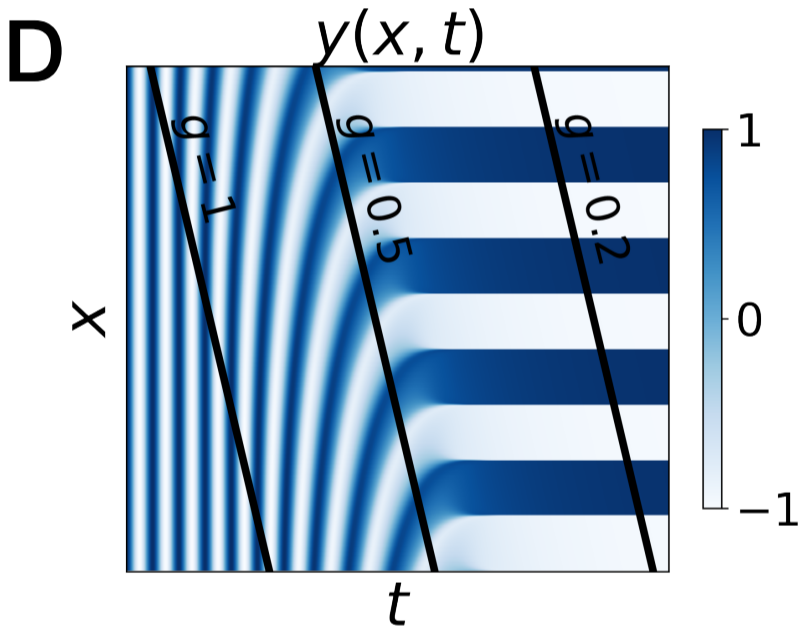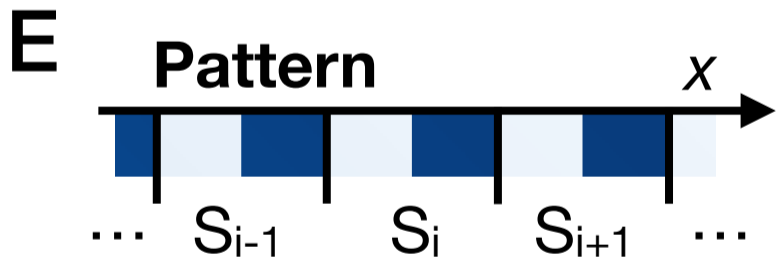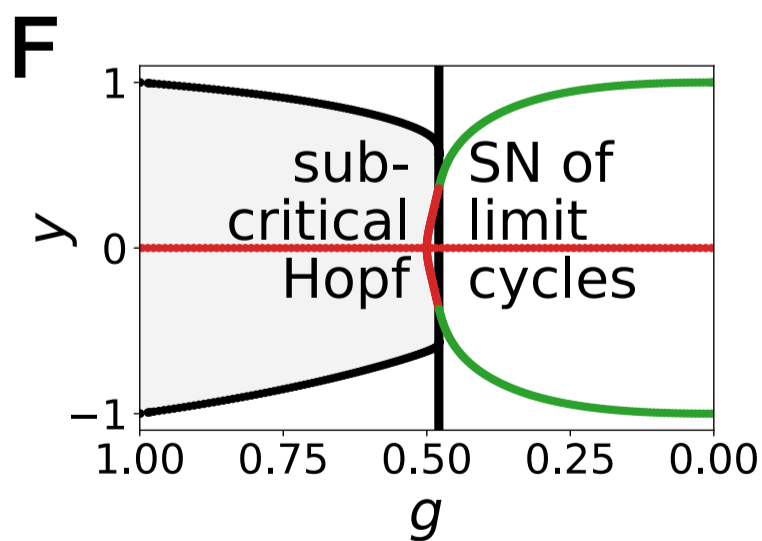

— stable fixed point

— unstable fixed point

— stable oscillations

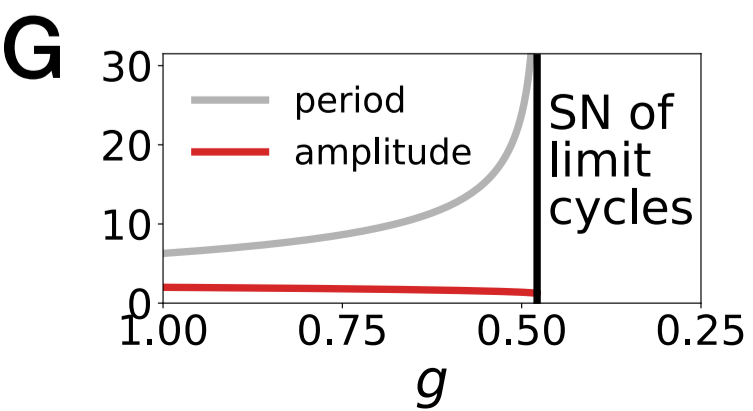

# Flow plots

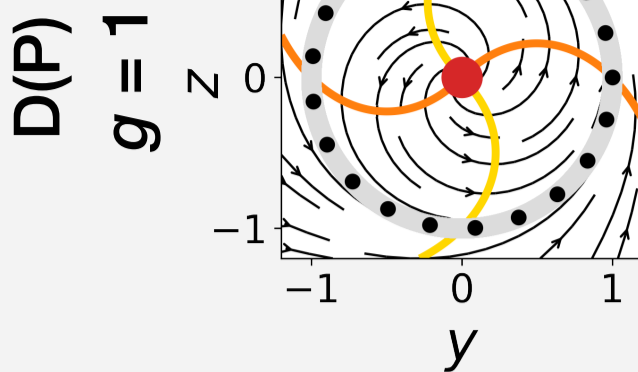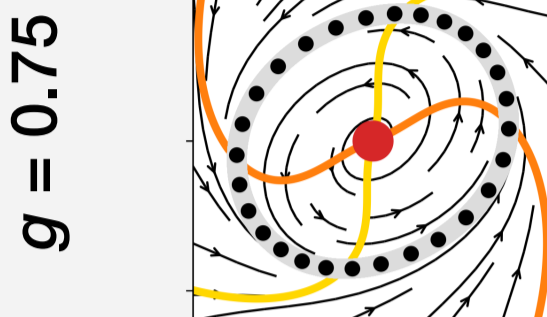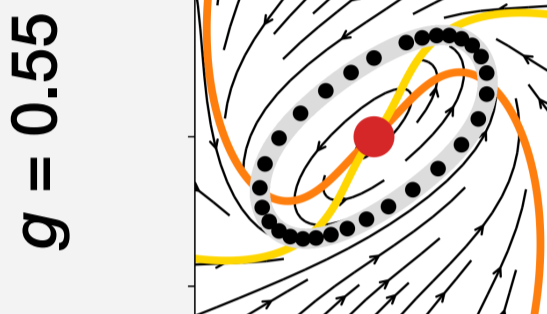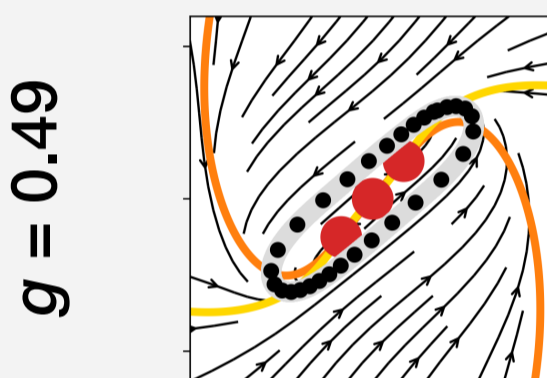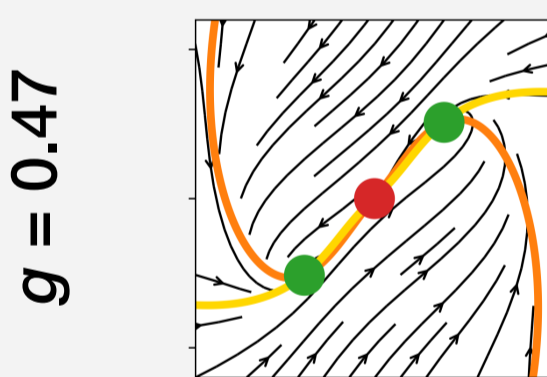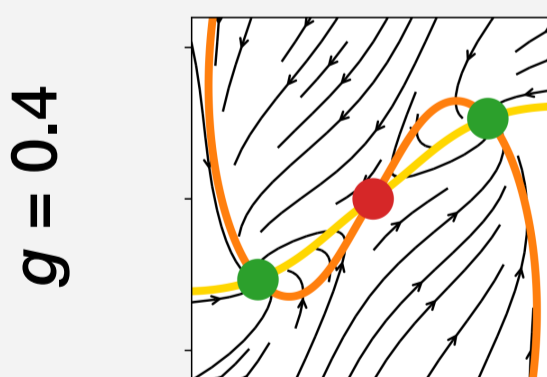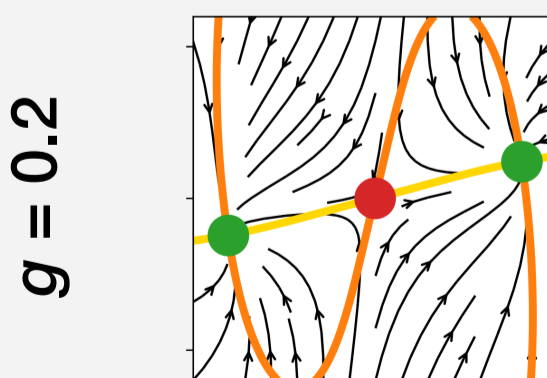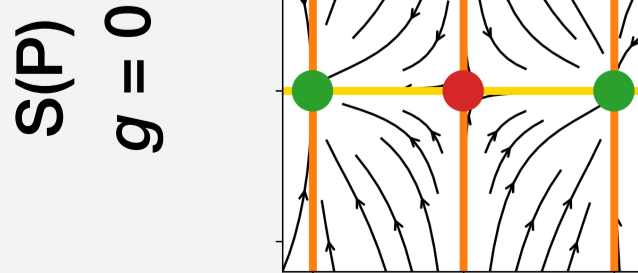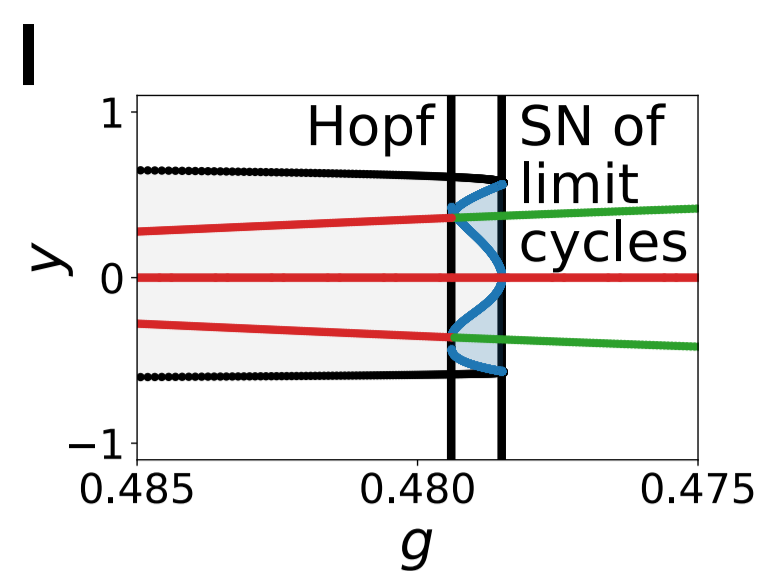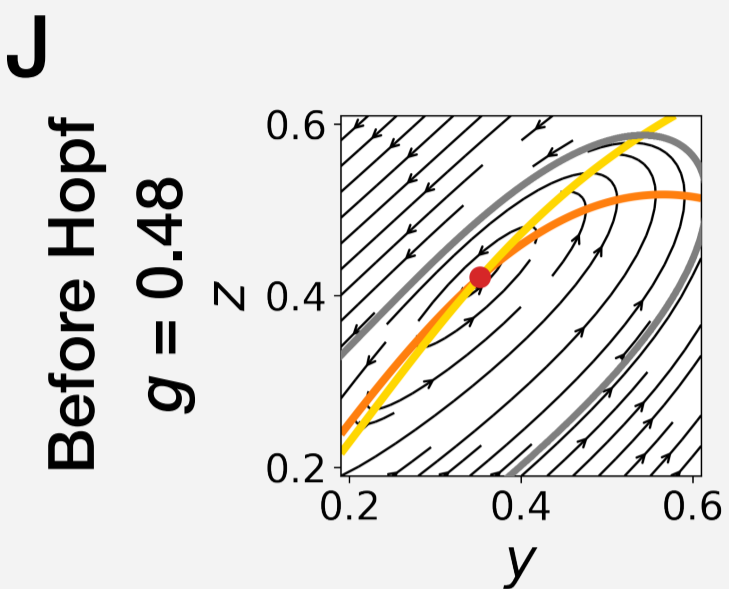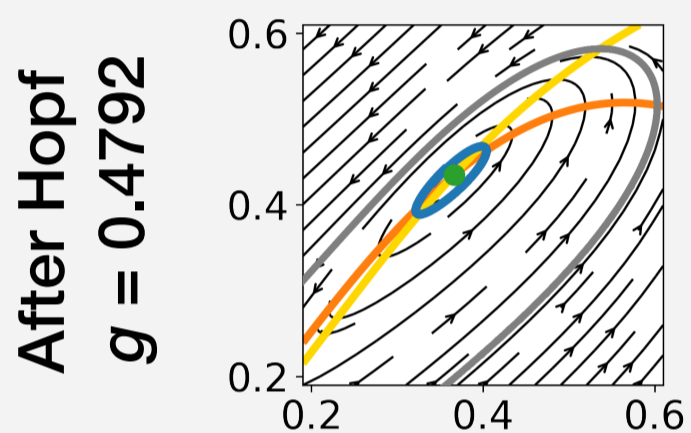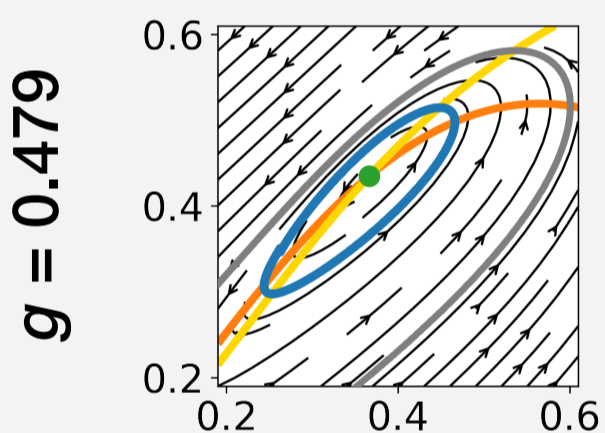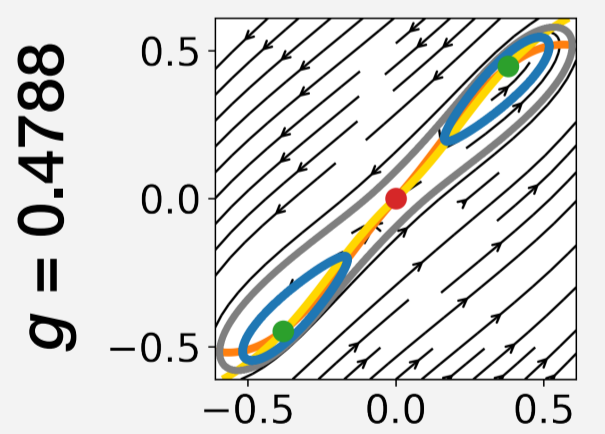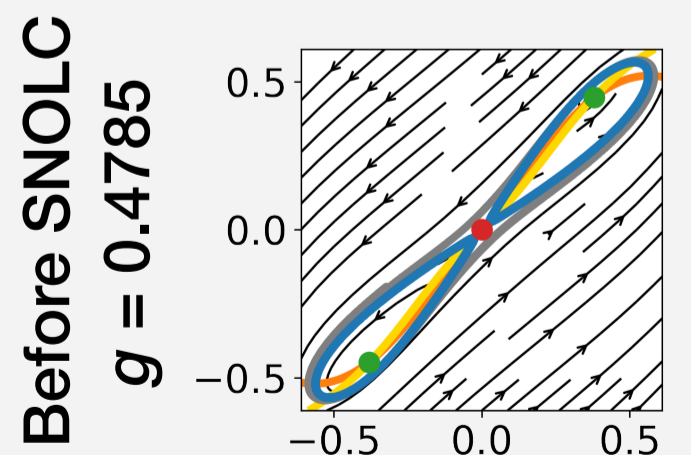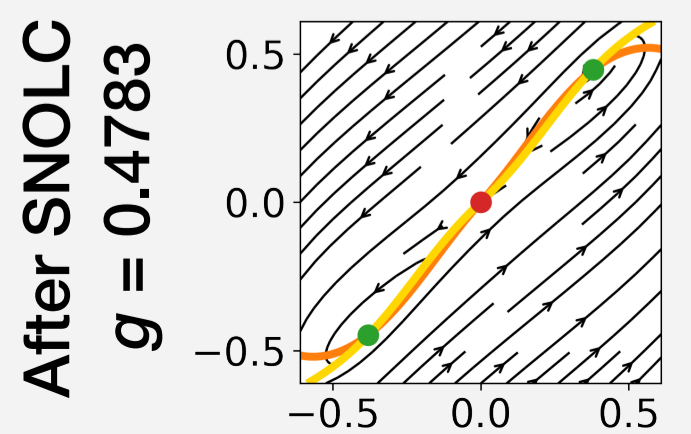

Supplement: supp [file elife-55778-supp-v1.zip › elife_poa_e55778_Figure_4_figure_supplement_4.pdf]

# Model 1

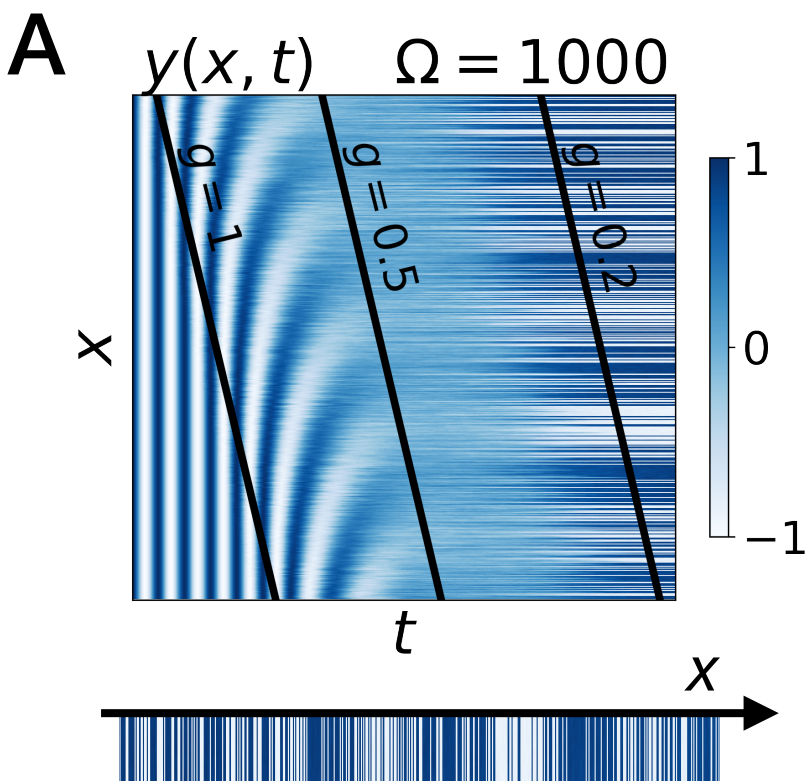

# Model 2

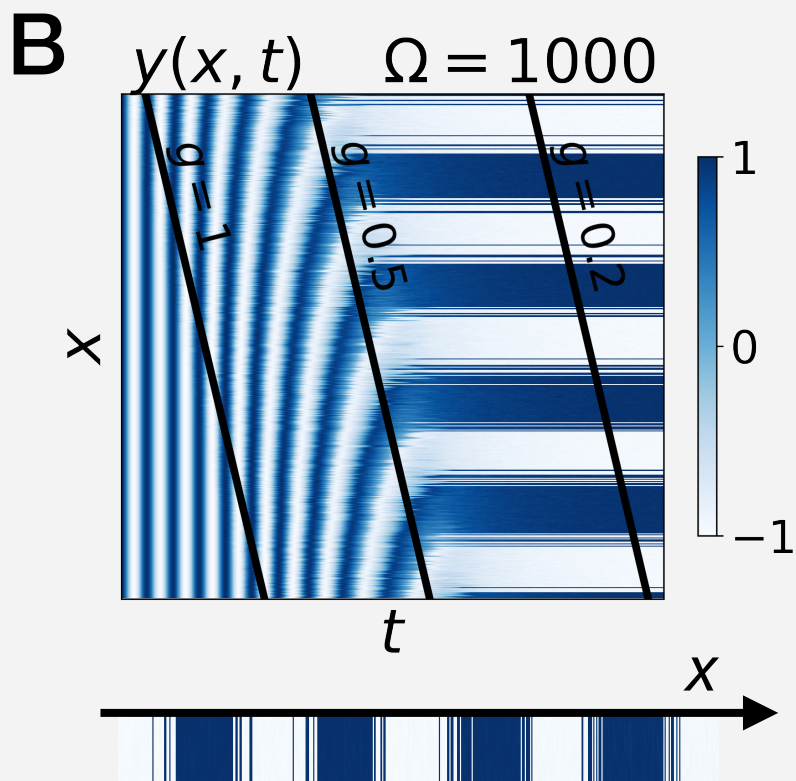

# Model 3

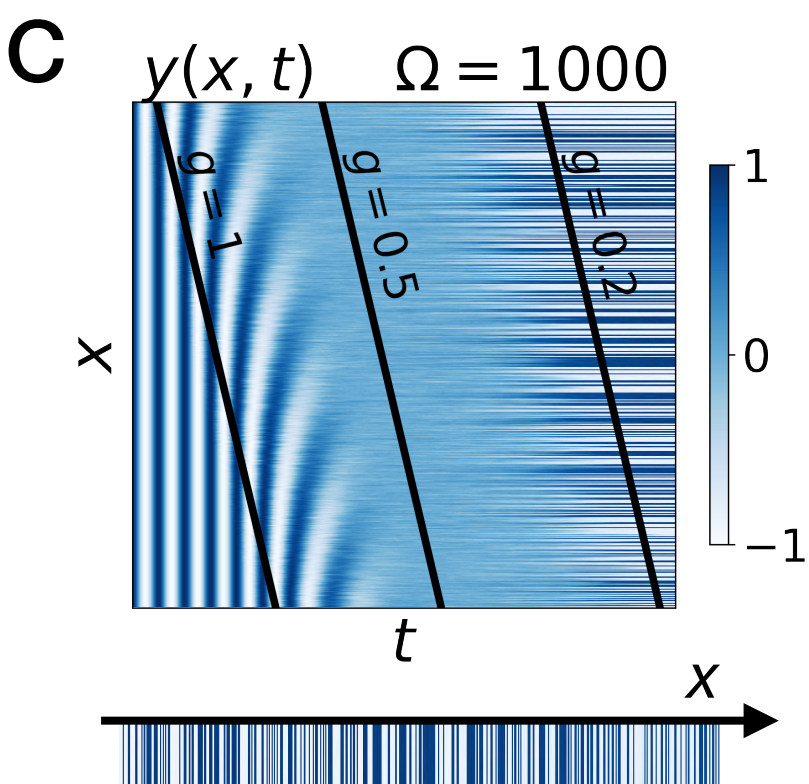

# Model 4

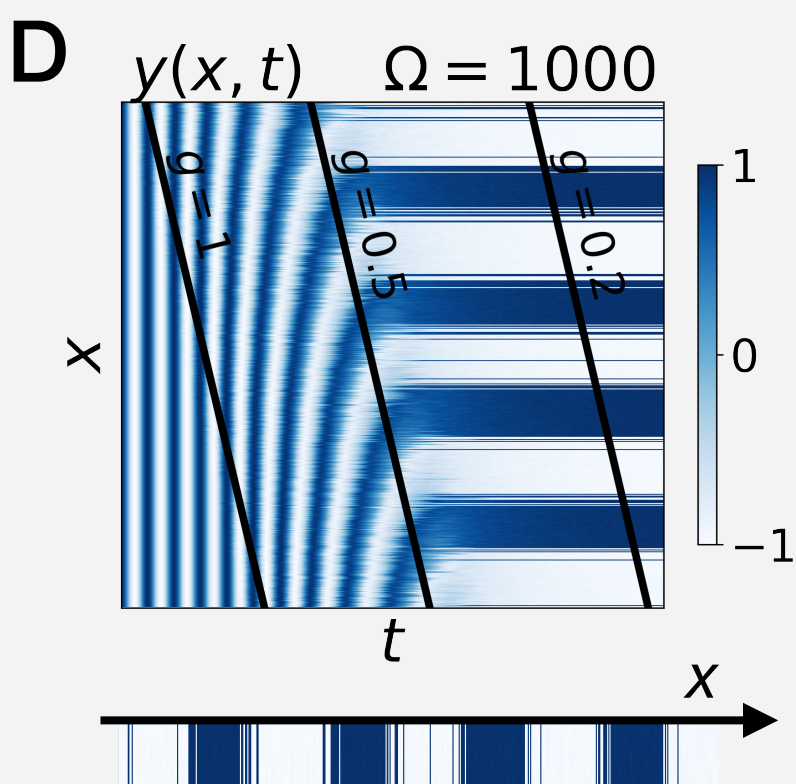

# E

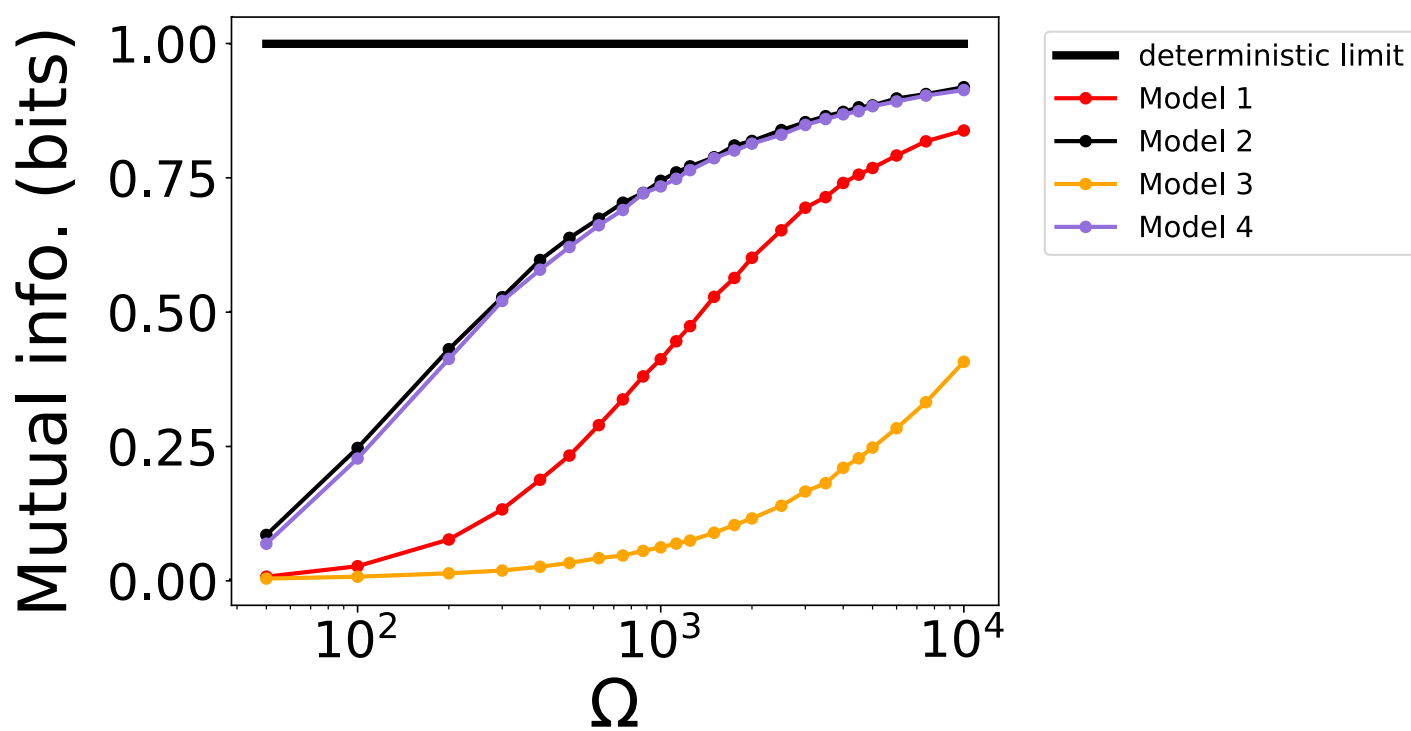

# F

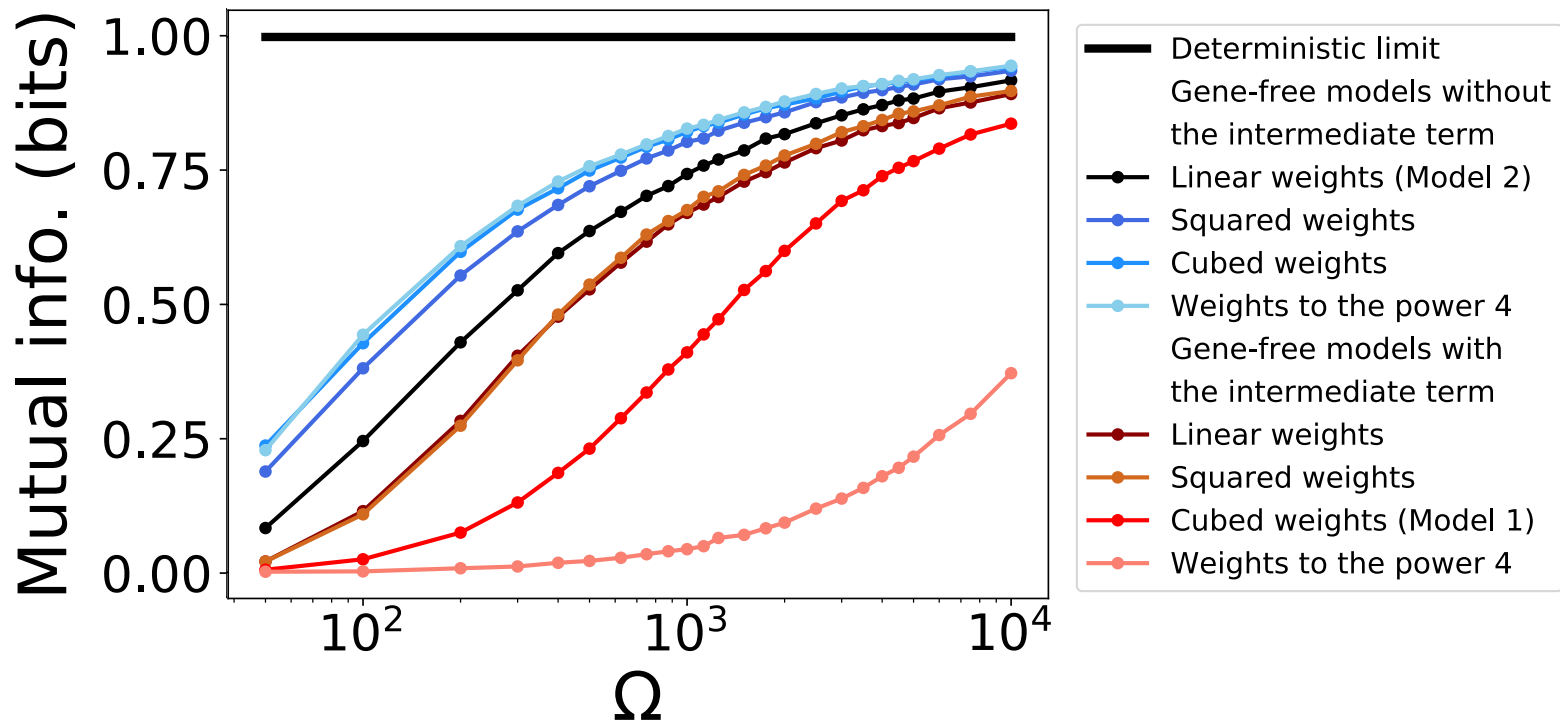

Supplement: supp [file elife-55778-supp-v1.zip › elife_poa_e55778_Figure_4_figure_supplement_5.pdf]

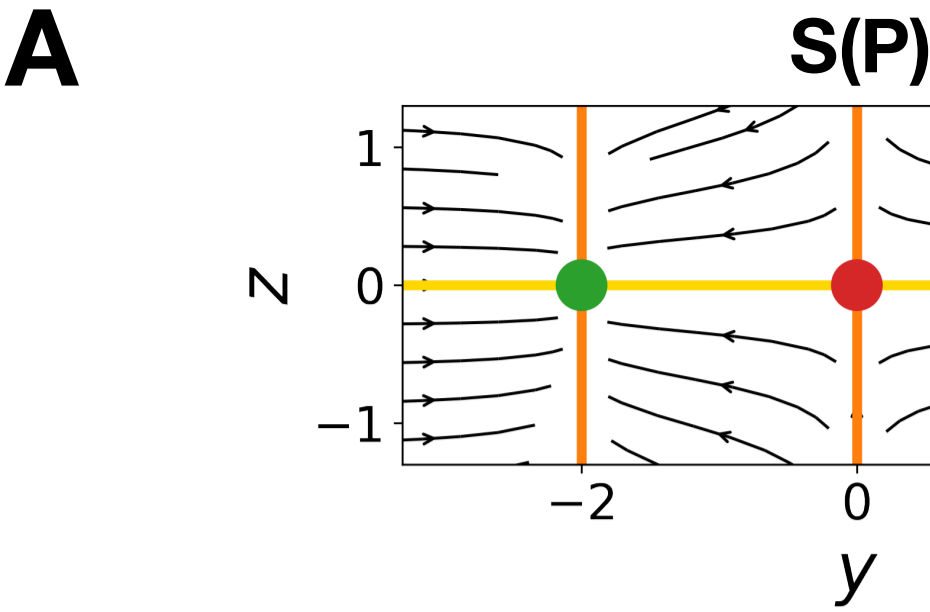

**B**

**Gene-free Model 1**

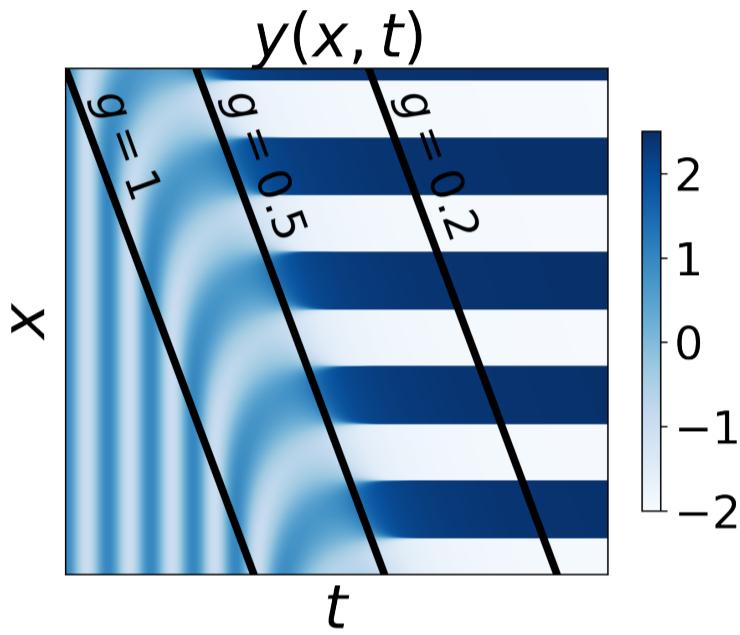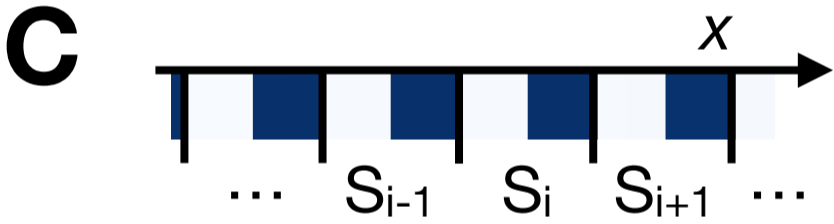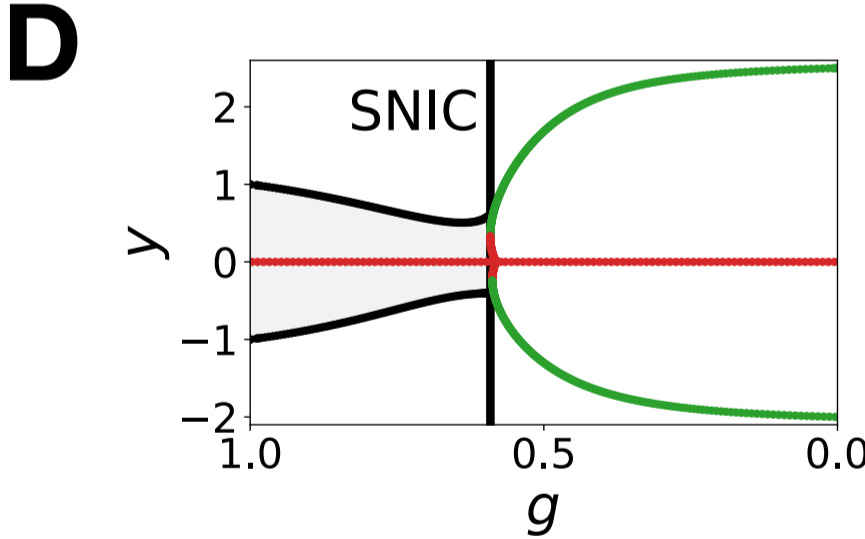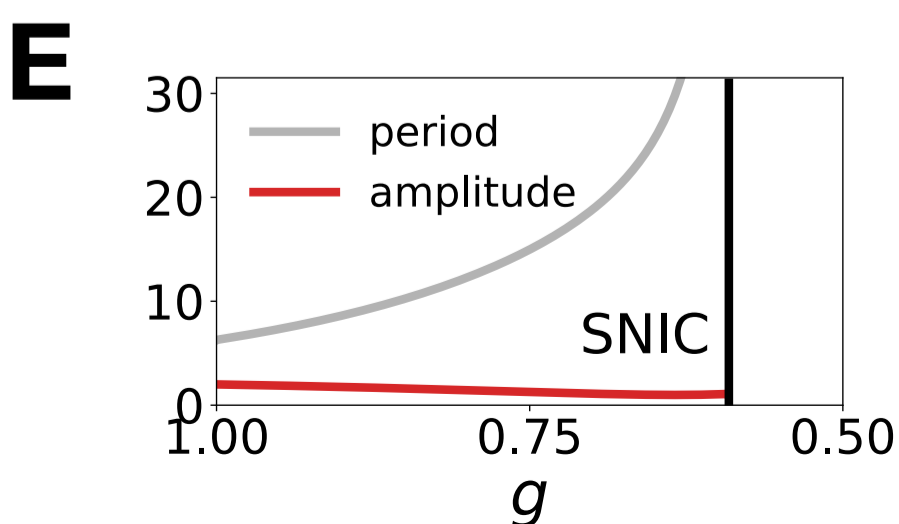

**Gene-free Model 2**

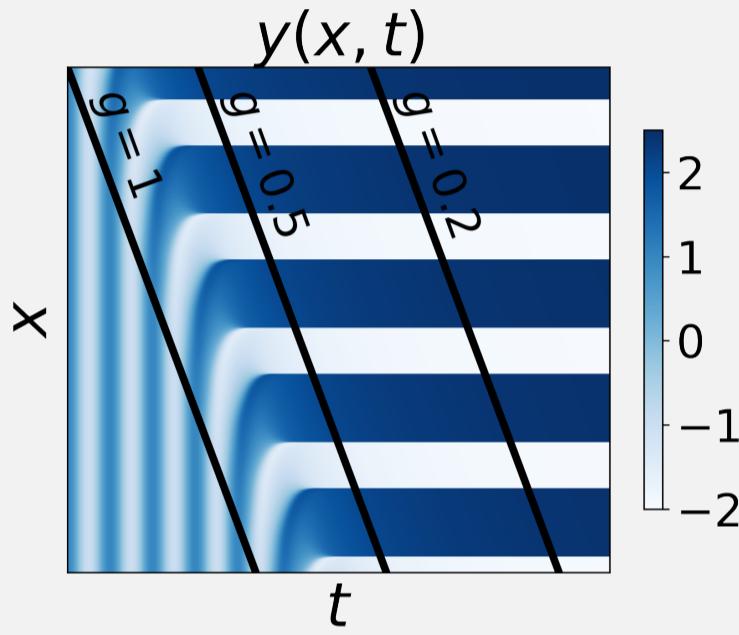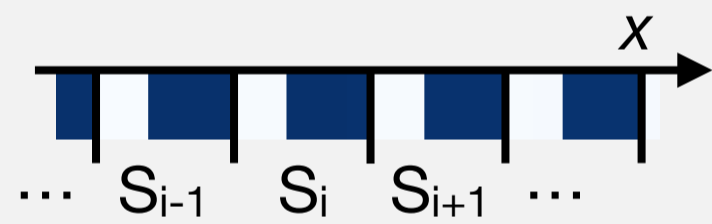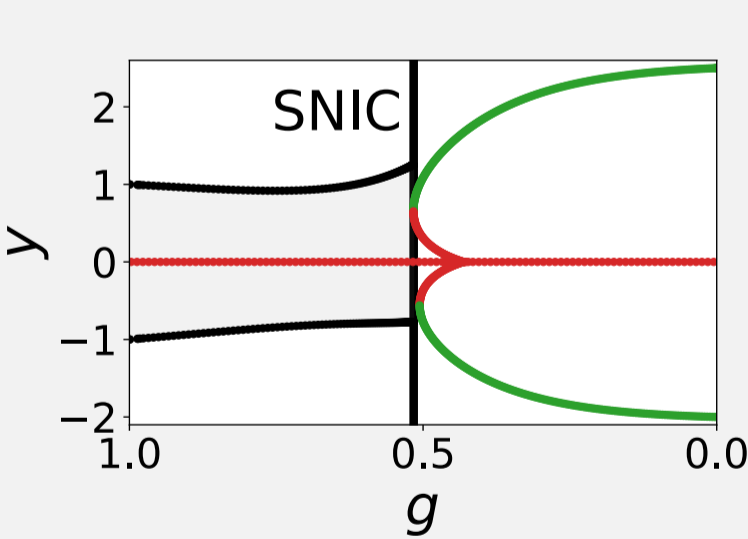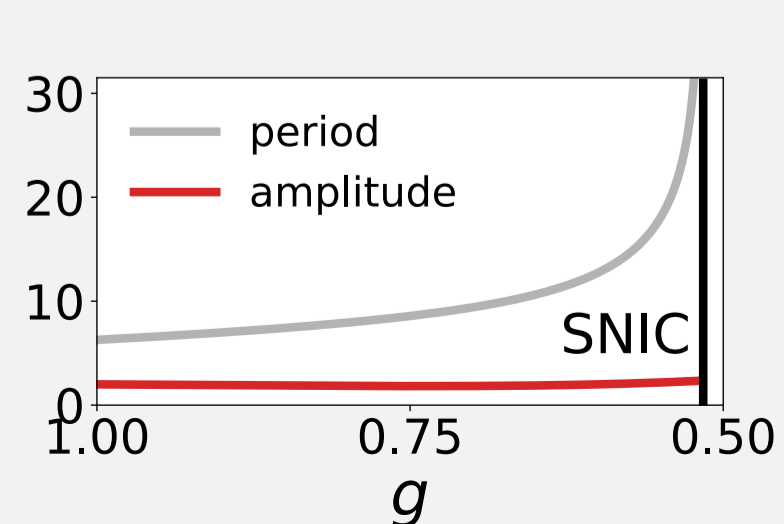

— stable fixed point    — unstable fixed point    — stable oscillations

Supplement: supp [file elife-55778-supp-v1.zip › elife_poa_e55778_Figure_6_figure_supplement_1.pdf]

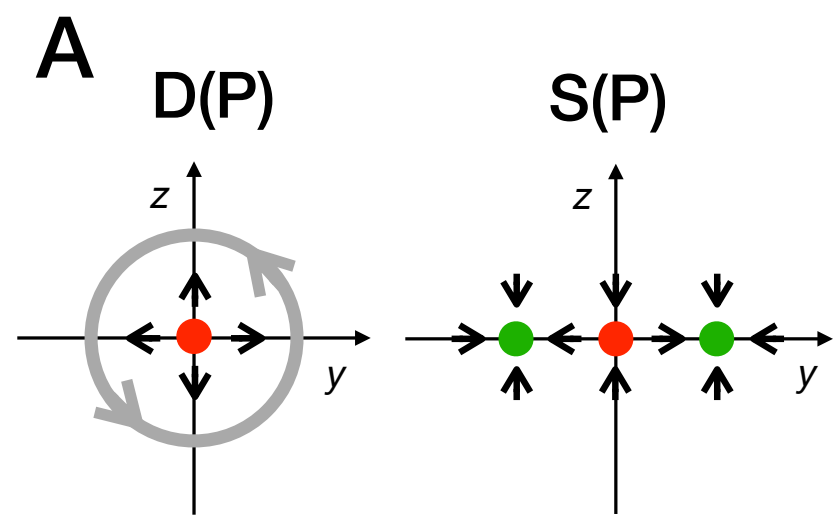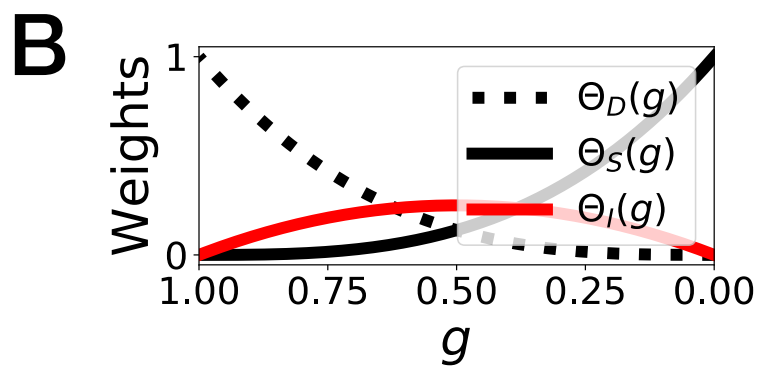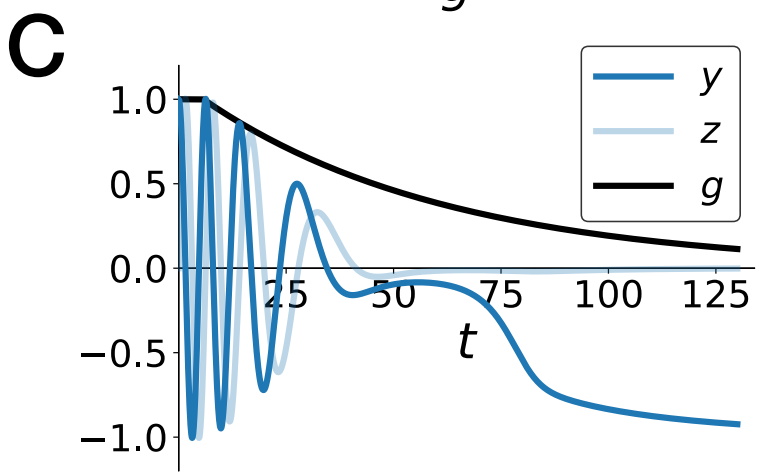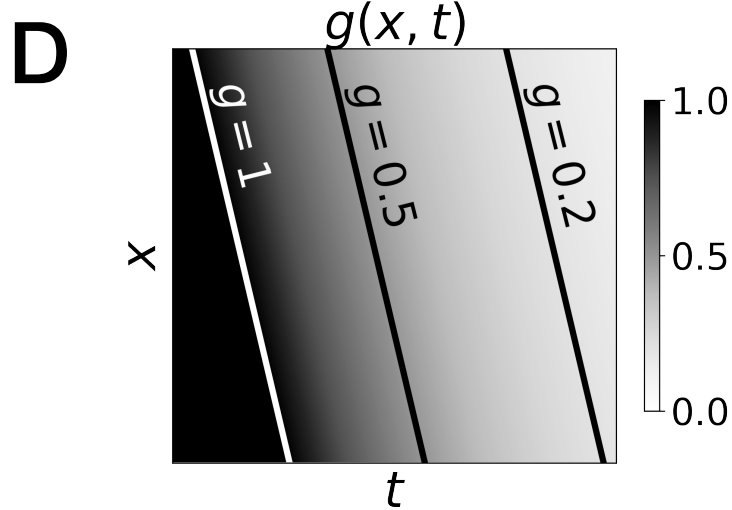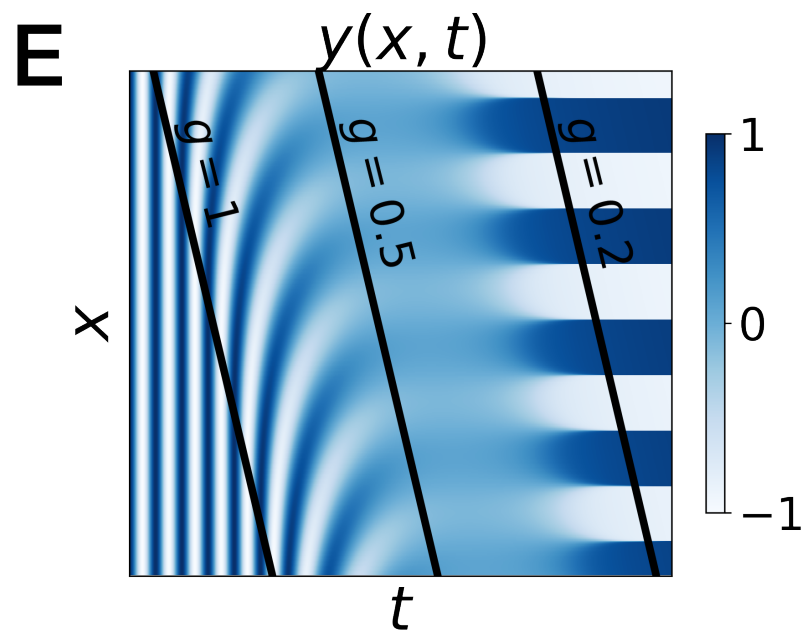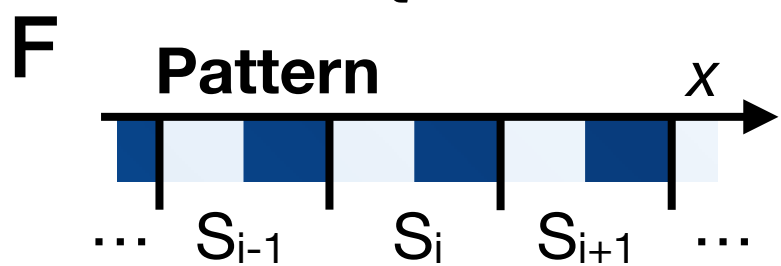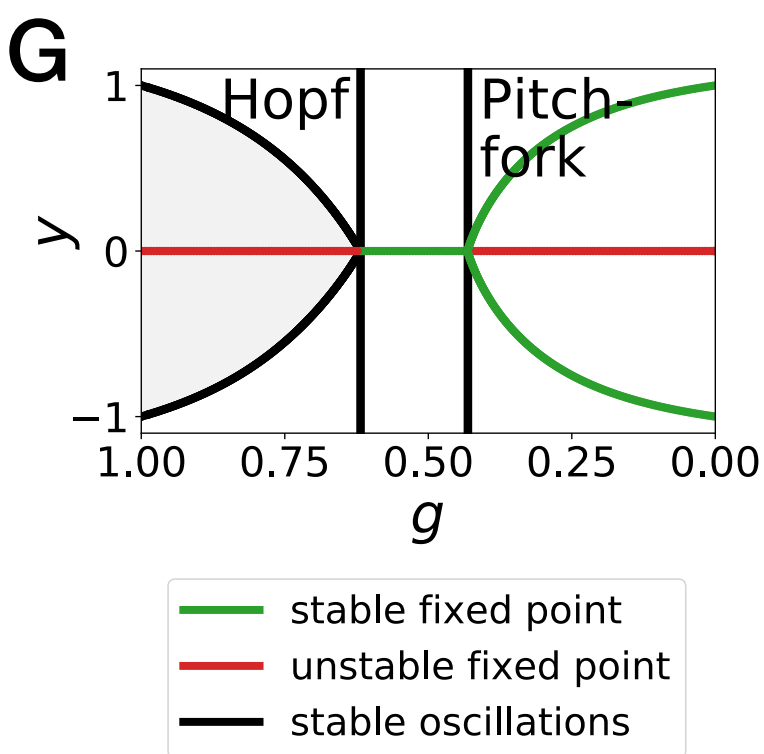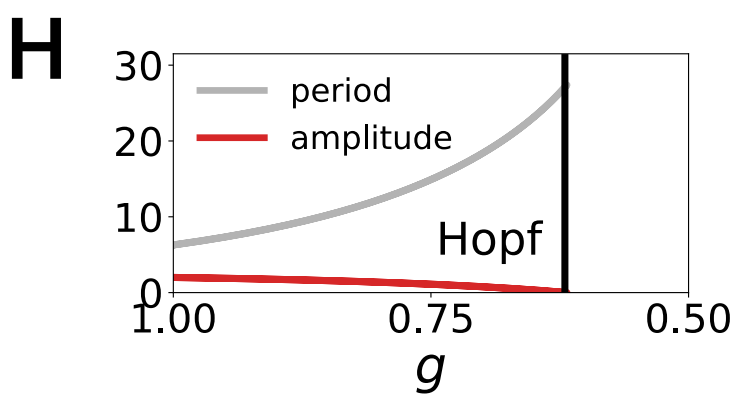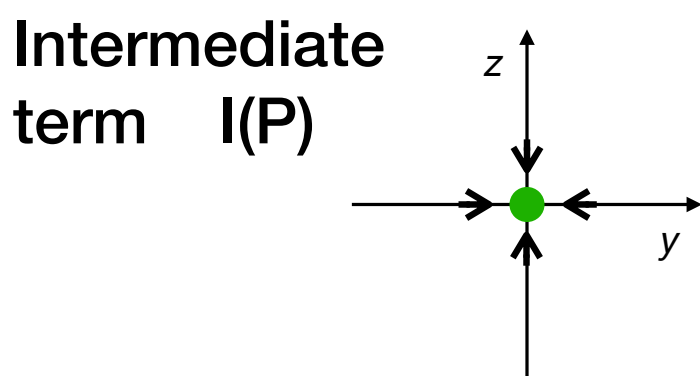

**I** **Flow plots**

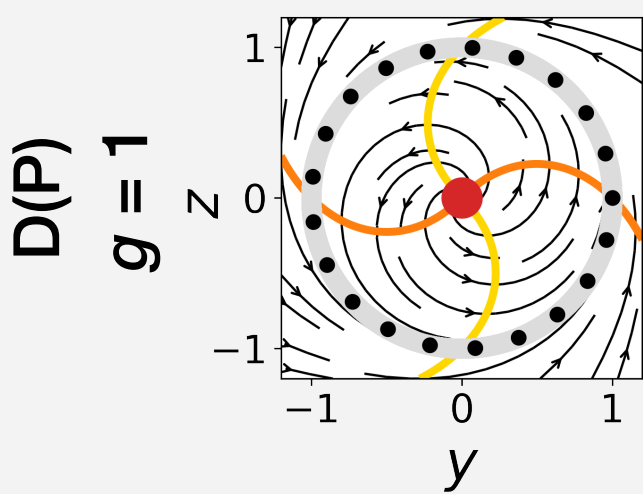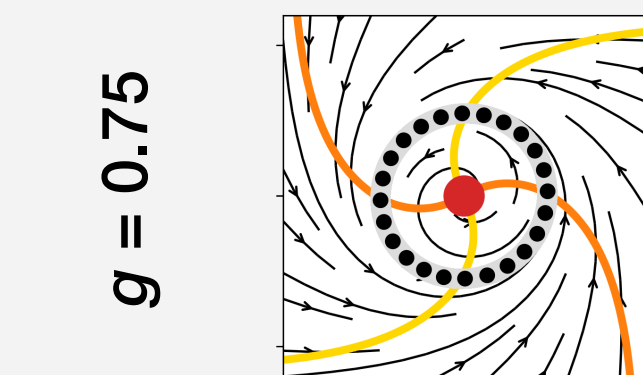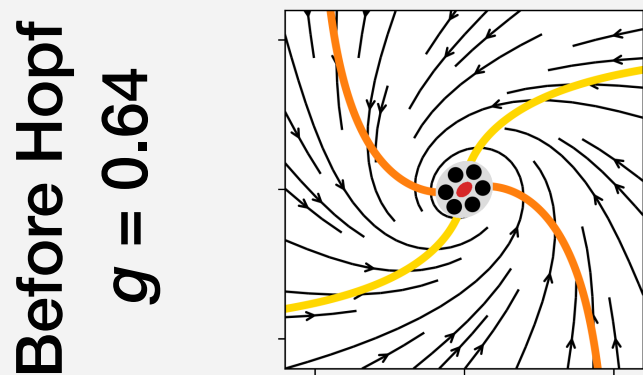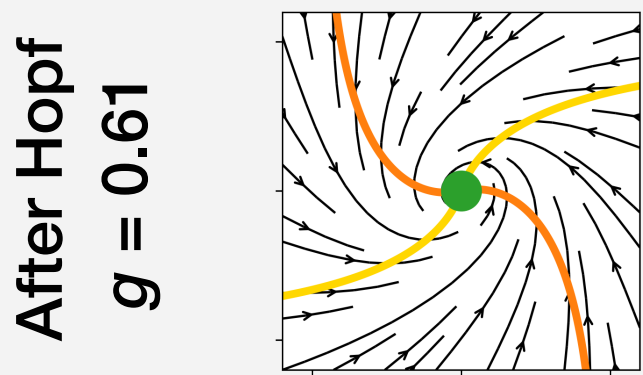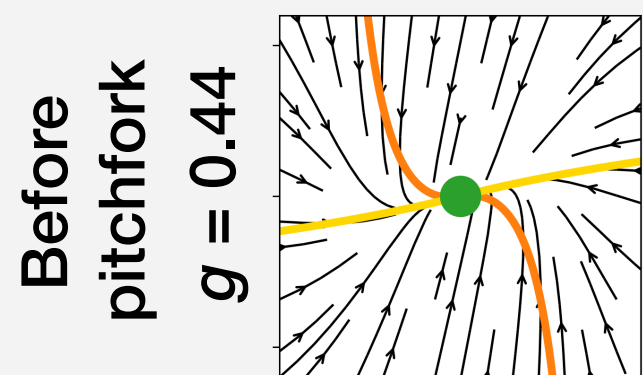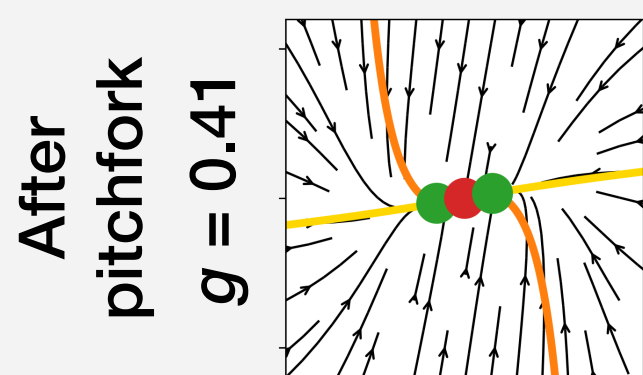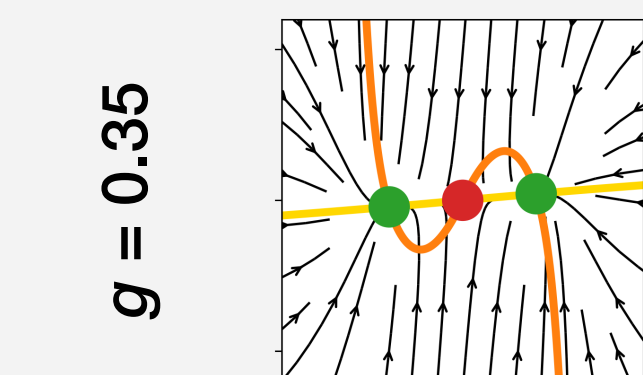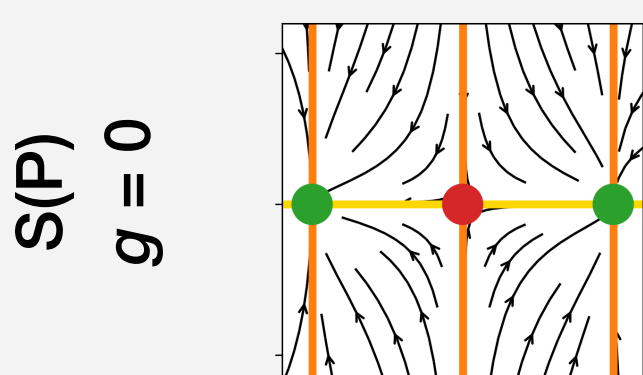

Supplement: supp [file elife_poa_e55778_Figure_4_figure_supplement_2.pdf › elife_poa_e55778_Figure_4_figure_supplement_2.pdf]
